# Supplementary material for: B,N-doped PAHs from tridentate ‘Defects’ – a bottom-up convergent approach for π-extended systems
Source: Royal Society of Chemistry journal article supplement (doi:10.1039/d2cc01801b), 2022-01-01
Supplement: d2cc01801b1.pdf [file d2cc01801b1.pdf]

## Table of contents:

|                                               |    |
|-----------------------------------------------|----|
| 1. General information .....                  | 2  |
| 2. Experimental section.....                  | 4  |
| 2.1 Experimental procedures.....              | 4  |
| 3. NMR spectra .....                          | 10 |
| 4. Mass spectra.....                          | 45 |
| 5. UV-VIS spectra .....                       | 51 |
| 6. Emission spectra.....                      | 53 |
| 7. Lifetime measurements.....                 | 55 |
| 8. Theoretical calculations.....              | 59 |
| 8.1. Optimization details.....                | 59 |
| 8.2. TD-DFT predicted UV Vis transitions..... | 61 |
| 8.3. GIAO-DFT predicted NMR values.....       | 77 |
| 9. Crystallographic data.....                 | 80 |

## 1. General information

**NMR Spectroscopy.**  $^1\text{H}$  NMR spectra were recorded on a high-field spectrometer ( $^1\text{H}$  600.15 MHz and 500 MHz,  $^{13}\text{C}$  151 MHz and 125.75 MHz), equipped with a broadband inverse gradient probe head. Spectra were referenced to the residual solvent signal (chloroform- $d$ , 7.26 ppm and methanol- $d_4$ , 3.31 ppm in  $^1\text{H}$  spectra and chloroform- $d$ , 76.16 ppm and methanol- $d_4$ , 49.00 ppm in  $^{13}\text{C}$  spectra). The experiments were performed at 300K if not specified.

**Mass Spectrometry.** High resolution and Accurate Mass spectra were recorded on a Bruker apex ultra FTMS and a Bruker microTOF-Q spectrometers using the electrospray technique.

**UV-Vis Spectroscopy.** Electronic spectra were recorded on an Agilent Technologies Carry-60 spectrophotometer.

**Fluorescence.** For recording photoluminescence excitation (PLE) and emission (PL) spectra the FSL980 Fluorescence Spectrometer from Edinburgh Instruments Ltd was used with a 450 W Xenon arc lamp (PL and PLE) as an excitation source. Emission spectra were corrected for the recording system efficiency and excitation spectra were corrected for the incident light intensity. PLE and PL spectra and QY were measured using a cooled extended-red Hamamatsu photomultiplier operating in a 200 – 1050 nm range. Quantum yield measurements were performed by using an Edinburgh Instruments integrating sphere equipped with a small elliptical mirror and a baffle plate for beam steering and shielding against directly detected light. For the measurement, the integrating sphere replaced the standard sample holder inside the sample chamber. Calculations of quantum yields were made using the software provided by Edinburgh Instruments. The decay curves of the luminescence excited by pulsed diode with excitation line 280 nm were recorded with the low-noise F-G05 detector featuring a Hamamatsu H5773-04 photomultiplier. The maximum of emission was chosen as an observation wavelength.

**X-Ray Analysis.** X-Ray quality crystals were prepared by slow evaporation or vapor diffusion in different solvents sets, based on the structure. SCXRD measurements for **1c**, **1e** and **5**, were performed using the following instrument: Bruker D8 Quest Eco diffractometer at 100K equipped with Photon II CPAD detector, MoK $\alpha$  ( $\lambda = 0.71073 \text{ \AA}$ ) sealed tube radiation source and Triumph<sup>®</sup> optics. For structures **1b**, **2a** and **3-O-3** a Rigaku Oxford Diffraction XtaLAB Synergy-R DW diffractometer equipped with a HyPix ARC 150 $^\circ$  Hybrid Photon Counting (HPC) detector using CuK $\alpha$  ( $\lambda = 1.54184 \text{ \AA}$ ) was used. For structure **1d** a Xcalibur R diffractometer equipped with Ruby CCD detector using CuK $\alpha$  ( $\lambda = 1.54184 \text{ \AA}$ ) was employed. For structure **1a**, a Xcalibur Gemini Ultra diffractometer equipped with Ruby CCD detector using CuK $\alpha$  ( $\lambda = 1.54184 \text{ \AA}$ ) was used.

Data were processed using the CrystAlisPro software. The structures were solved by intrinsic phasing with SHELXT (2015 release) and refined by full-matrix least-squares methods based F 2 using SHELXL. For all structures, H atoms bound to C atoms were placed in the geometrically idealized positions and treated in riding mode, with C-H = 0.95  $\text{\AA}$  and Uiso(H) = 1.2Ueq(C) for C-H groups, and C-H = 0.98  $\text{\AA}$  and Uiso(H) = 1.5Ueq(C) for CH<sub>3</sub> groups, while the O- and N-bound H atoms were refined freely.

**Theoretical calculations.** Geometry optimizations for all the derivatives were carried out with the Gaussian 09<sup>[1]</sup> software package within unconstrained C1 symmetry, with starting coordinates derived from semi-empirical calculations. Becke's three-parameter exchange functional with the gradient-corrected correlation formula of Lee, Yang and Parr (DFT-B3LYP)<sup>[2]</sup> were used with the 6-31G(d,p) basis set. The polarizable continuum model of solvation was used (PCM, standard dichloromethane) for all optimizations.

The electronic spectra were simulated by means of time-dependent density functional theory (TD-DFT) using the Tamm-Dancoff approximation for 50 states and 6-31G(d,p) basis set for all the derivatives. The electronic transitions and UV/Vis were analyzed by means of the GaussSum program. The transitions were convoluted by Gaussian curves with 2000 cm<sup>-1</sup> half line width for all the derivatives.

The SCF GIAO NMR predictions were determined starting from the optimized geometries and using a shielding value of 31.75 ppm when calculated in CDCl<sub>3</sub> and a shielding value of 31.74 when calculated in CD<sub>3</sub>OD. Shielding values were calculated on the TMS (tetramethyl silane) optimized structure.

**LC-MS analysis.** The LC-MS analysis was performed on Shimadzu LC IT-TOF. Separation was carried out on an RP-Zorbax (50×2.1 mm, 3.5  $\mu$ m) column with a gradient elution of 0-80% B in A (A = 0.1% HCOOH in water; B = 0.1% HCOOH in MeCN) at room temperature over a period of 20 min (flow rate: 0.1 mL/min).

**SEC chromatography.** SEC column were performed using Bio-Beads S-X1 Support, styrene divinylbenzene with 1% crosslinkage, 40-80  $\mu$ m bead size, 600-14,000 MW exclusion range as stationary phase and THF as eluent.

---

<sup>[1]</sup> Gaussian 09, Revision E.01; M. J. Frisch et al., Gaussian, Inc.: Wallingford CT, 2009.

<sup>[2]</sup> a) C. T. Lee, W. T. Yang, R. G. Parr, *Phys. Rev. B*, 1988, **37**, 785-789. b) A. D. Becke, *Phys. Rev. A*, 1988, **38**, 3098-3100.

## 2. Experimental section.

All solvents (methanol, ethyl acetate, chloroform, *n*-hexane, toluene, acetone, water and tetrahydrofuran) if not indicated differently were used without purification. CH<sub>2</sub>Cl<sub>2</sub> was distilled over CaH<sub>2</sub>. Chloroform-*d* was prepared directly before using by passing through a basic alumina column. All reactions were performed under inert atmosphere.

### 2.1 Experimental procedures.

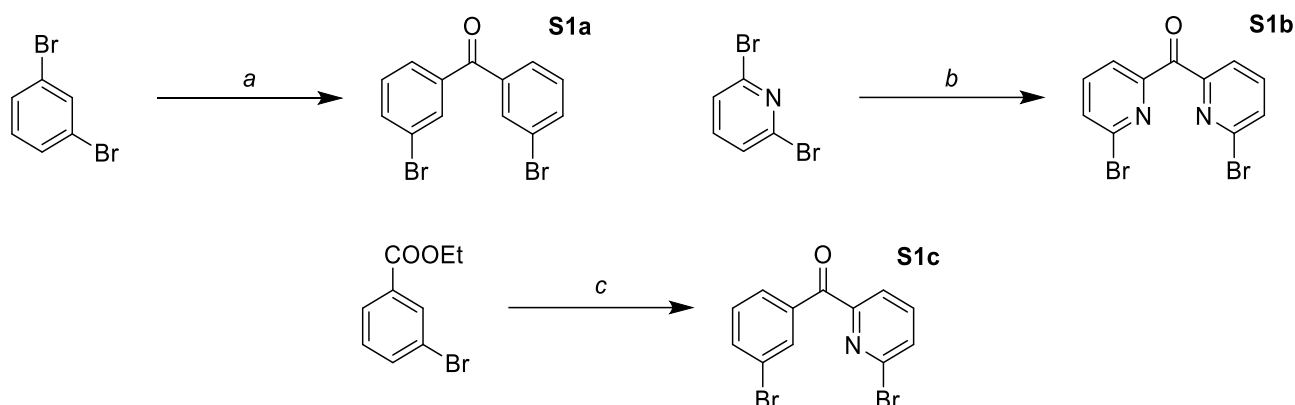

**Scheme S1.** Synthetic approach for **S1a**, **S1b** and **S1c** synthons used in this work. Conditions: *a*, 1,3-dibromobenzene (1.0 eq.), *n*BuLi (1.001 eq.), diethyl carbonate (2.01 eq.), THF, -78 °C to RT, Ar, 16h; *b*, 2,6-dibromopyridine (2.2 eq.), *n*BuLi (2.4 eq.), diethyl carbonate (1.0 eq.), THF, -78 °C to 0 °C, Ar, 2h; *c*, ethyl 3-bromobenzoate (1.0 eq.), 2,6-dibromopyridine (1.0 eq.), *n*BuLi (1.01 eq.), THF, -78 °C to RT, Ar, 2h.

**S1a** was prepared according to Gibb et al. procedure.<sup>[3]</sup>

**S1b** was prepared according to Mayor et al. procedure.<sup>[4]</sup>

**S1c** was prepared according to a modified procedure of Mayor et al.<sup>[4]</sup>

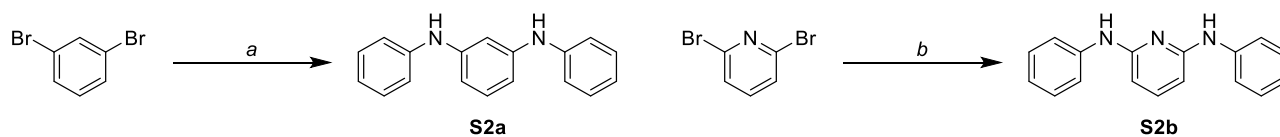

**Scheme S2.** Synthetic approach for motifs **S2a** and **S2b** used in this work. Conditions: *a*, 1,3-dibromobenzene (1.0 eq.), aniline (3.0 eq.), Pd<sub>2</sub>(dba)<sub>3</sub> (2.0% eq.), racBINAP (4.0% eq.), NaO<sup>t</sup>Bu (3.6 eq.); *b*, 2,6-dibromopyridine (1.0 eq.), aniline (2.4 eq.), Pd<sub>2</sub>(dba)<sub>3</sub> (2.0% eq.), racBINAP (4.0% eq.), NaO<sup>t</sup>Bu (2.8 eq.).

<sup>[3]</sup> X. Li, C. L. D. Gibb, M. E. Kuebel, and B. C. Gibb, *Tetrahedron*, **2001**, 57, 1175-1182.

<sup>[4]</sup> M. Lindner, M. Valàsek, J. Homberg, K. Edelmann, L. Gerhard, W. Wulfhekel, O. Fuhr, T. Wächter, M. Zharnikov, V. Kolivoska, L. Pospìsil, G. Mészáros, M. Hromadová, and M. Mayor, *Chem. Eur J.*, **2016**, 22, 13218-13235.



**S2a** was prepared according to Hatakeyama et al. procedure.<sup>[5]</sup>

**S2b** was prepared according to the procedure of Buchwald and co-worker. [6]

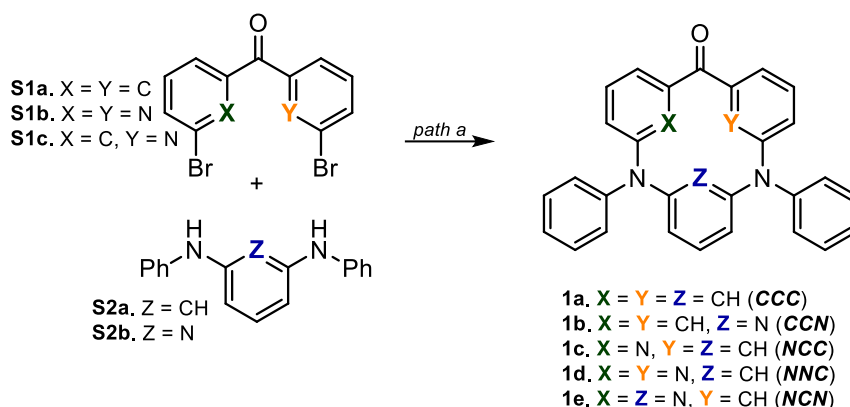

**Scheme S3.** Synthetic approach for the formation of macrocycles **1a-e**.

### General procedure for the preparation of Macrocycles **1a-1e**.<sup>[5]</sup>

A Schlenk tube was charged with **S1a** or **S1b** or **S1c** (0.15 mmol), Pd<sub>2</sub>(dba)<sub>3</sub> (7.5% mol. halo), RuPhos (30% mol. halo), **S2a** or **S2b** (0.15 mmol) and K<sub>3</sub>PO<sub>4</sub> (10 eq.) and was allowed to dry under high vacuum overnight. In the morning, 15 mL of degassed toluene (**1b**, **1d**) or *o*-xylene (**1a**, **1c**, **1e**) was added to the tube and the reaction mixture was refluxed for 24 hours. After reaction completion, the crude product was allowed to chill to room temperature and it was passed through a silica plug (eluent: ethyl acetate). The obtained solution was dried under reduced pressure and subjected to column chromatography purification.

**Macrocycle, 1a.** The product was obtained in 71% yield as a pale yellow solid (column chromatography conditions: *n*Hexane/ CH<sub>2</sub>Cl<sub>2</sub> 1:1 to 100% CH<sub>2</sub>Cl<sub>2</sub>). <sup>1</sup>H NMR (600 MHz, 300K, CDCl<sub>3</sub>)  $\delta$  7.58 (m, 3H), 7.47 (ddd, <sup>3</sup>J = 8.0 Hz, <sup>4</sup>J = 2.4 Hz, <sup>4</sup>J = 0.9 Hz, 2H), 7.37 (t, <sup>3</sup>J = 7.8 Hz, 2H), 7.29 (m, 4H), 7.17-7.14 (m, 5H), 7.01 (t, <sup>4</sup>J = 1.9 Hz, 2H) 7.00-6.96 (m, 4H). <sup>13</sup>C NMR (151 MHz, 300K, CDCl<sub>3</sub>)  $\delta$  196.1, 149.2, 147.3, 146.3, 139.9, 132.5, 130.5, 129.7, 129.6, 128.6, 127.6, 123.8, 122.9, 121.6, 119.4, HRMS (m/z): 439.1811 [M+H]<sup>+</sup> (theor. calc. 439.1805 for C<sub>31</sub>H<sub>22</sub>N<sub>2</sub>O), UV-Vis: 284, 404 nm, Extinction: 2.3 · 10<sup>4</sup> M<sup>-1</sup>cm<sup>-1</sup>, Emission: 495 nm.

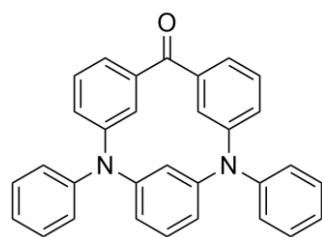

**Macrocycle, 1b.** In this case, Pd<sub>2</sub>dba<sub>3</sub> (5% halo.) and XantPhos (10% halo.) were used. The product was obtained in 35% yield as a pale yellow solid (column chromatography conditions: 100% CH<sub>2</sub>Cl<sub>2</sub>). <sup>1</sup>H NMR (600 MHz, 300K, CDCl<sub>3</sub>)  $\delta$  = 8.66 (t, <sup>4</sup>J = 1.9 Hz, 2H), 7.68 (ddd, <sup>3</sup>J = 7.6, <sup>4</sup>J = 1.5, 1.0 Hz, 2H), 7.51-7.44 (m, 4H), 7.39-7.29 (m, 8H), 7.24 (t, <sup>3</sup>J = 8.1 Hz, 1H), 7.00 (ddd, <sup>3</sup>J = 8.1, <sup>4</sup>J = 2.3, 0.9 Hz, 2H), 6.23 (d, <sup>3</sup>J = 8.1 Hz, 2H). <sup>13</sup>C NMR (151 MHz, 300K, CDCl<sub>3</sub>)  $\delta$  = 196.6, 155.9, 143.8, 142.9, 138.7, 137.8, 134.9, 130.2, 128.0, 127.8, 127.3, 126.5, 123.1, 104.9,

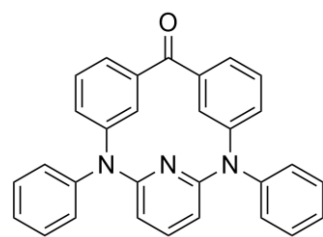

<sup>[5]</sup> S. Nakatsuka, H. Gotoh, K. Kinoshita, N. Yasuda, T. Hatakeyama, *Angew. Chem. Int. Ed.*, **2017**, 56, 5087-5090.

<sup>[6]</sup> S. Wagaw and S. L. Buchwald. *J. Org. Chem.*, **1996**, 61, 21, 7240-7241.

**HRMS (m/z):** 440.1743 [M+H]<sup>+</sup> (theor. calc. 440.1757 for C<sub>30</sub>H<sub>21</sub>N<sub>3</sub>O), **UV-Vis:** 268, 336 nm, **Extinction:** 2.5 · 10<sup>4</sup> M<sup>-1</sup>cm<sup>-1</sup>, **Emission:** 487 nm.

**Macrocycle, 1c.** The product was obtained in 54% yield as a yellow solid (column chromatography conditions: *n*Hexane/ CH<sub>2</sub>Cl<sub>2</sub> 1:1 to 80% CH<sub>2</sub>Cl<sub>2</sub>).

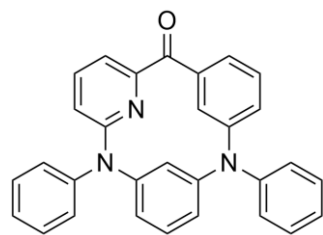

**<sup>1</sup>H NMR (600 MHz, 300K, CDCl<sub>3</sub>)**  $\delta$  8.77 (s, 1H), 8.00 (t, <sup>3</sup>J = 2.1 Hz, 1H), 7.59 (d, <sup>3</sup>J = 7.4 Hz, 1H), 7.54 – 7.47 (m, 3H), 7.47 – 7.35 (m, 7H), 7.21 – 7.12 (m, 4H), 7.01 (t, <sup>3</sup>J = 8.1 Hz, 1H), 6.72 (dd, <sup>3</sup>J = 8.1, <sup>4</sup>J = 2.2 Hz, 1H), 6.64 (d, <sup>3</sup>J = 8.5 Hz, 1H), 6.33 (ddd, <sup>3</sup>J = 8.0, <sup>4</sup>J = 2.0, 0.6 Hz, 1H). **<sup>13</sup>C NMR (151 MHz, 300K, CDCl<sub>3</sub>)**  $\delta$  192.2, 155.4, 151.8, 146.0, 145.5, 144.2, 143.1, 142.4, 137.2, 136.8, 129.4, 128.7, 127.9, 127.6, 127.4, 126.4, 126.3, 124.6, 124.1, 123.4, 122.1, 119.7, 117.3, 116.7, 114.4, 111.7, **HRMS (m/z):** 440.1771 [M+H]<sup>+</sup> (theor. calc. 441.1757 for C<sub>30</sub>H<sub>21</sub>N<sub>3</sub>O), **UV-Vis:** 292, 386 nm, **Extinction:** 3.45 · 10<sup>4</sup> M<sup>-1</sup>cm<sup>-1</sup>, **Emission:** 576 nm.

**Macrocycle, 1d.** The product was obtained in 77% yield as an orange solid (column chromatography conditions: ethyl acetate/ CH<sub>2</sub>Cl<sub>2</sub> 1:10).

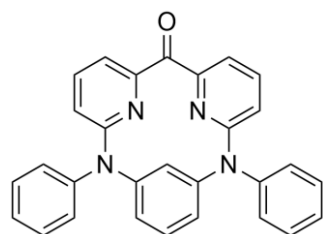

**<sup>1</sup>H NMR (600 MHz, 300K, CDCl<sub>3</sub>)**  $\delta$  8.51 (t, <sup>4</sup>J = 2.2 Hz, 1H), 7.55-7.44 (m, 12H), 7.34 (tt, <sup>3</sup>J = 7.2 Hz, <sup>4</sup>J = 1.4 Hz, 2H), 6.98 (t, <sup>3</sup>J = 8.1 Hz, 1H), 6.77 (dd, <sup>3</sup>J = 7.8 Hz, <sup>4</sup>J = 1.3 Hz, 2H), 6.42 (dd, <sup>3</sup>J = 8.1 Hz, <sup>4</sup>J = 2.2 Hz, 2H). **<sup>13</sup>C NMR (151 MHz, 300K, CDCl<sub>3</sub>)**  $\delta$  189.6, 157.0, 153.0, 143.8, 143.1, 138.2, 130.3, 128.3, 127.4, 126.8, 126.7, 118.2, 116.5, 113.9, **HRMS (m/z):** 441.1715 [M+H]<sup>+</sup> (theor. calc. 441.1710 for C<sub>29</sub>H<sub>20</sub>N<sub>4</sub>O), **UV-Vis:** 277, 405 nm, **Extinction:** 5.8 · 10<sup>4</sup> M<sup>-1</sup>cm<sup>-1</sup>, **Emission:** 576 nm.

**Macrocycle, 1e.** The product was obtained in 59% yield as a yellow solid (column chromatography conditions: 100% CH<sub>2</sub>Cl<sub>2</sub> to ethyl acetate/ CH<sub>2</sub>Cl<sub>2</sub> 1:10 and the purification was concluded with an additional SEC column with THF as solvent).

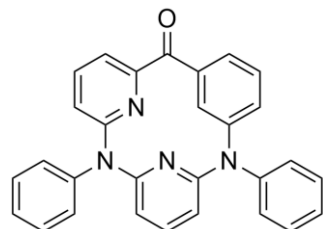

**<sup>1</sup>H NMR (600 MHz, 300K, CDCl<sub>3</sub>)**  $\delta$  = 9.67 (t, <sup>4</sup>J = 1.9 Hz, 1H), 7.60 (d, <sup>3</sup>J = 7.4 Hz, 2H), 7.55 (m, 2H), 7.52-7.41 (m, 8H), 7.30 (tt, <sup>3</sup>J = 7.1, <sup>4</sup>J = 1.3, 1H), 7.28-7.24 (m, 1H), 7.15 (t, <sup>3</sup>J = 7.8 Hz, 1H), 6.88 (ddd, <sup>3</sup>J = 8.1, <sup>4</sup>J = 2.4, 0.75, 1H), 6.44 (d, <sup>3</sup>J = 8.5 Hz, 1H), 6.28 (d, <sup>4</sup>J = 8.0 Hz, 1H), 5.94 (d, <sup>4</sup>J = 8.0, 1H). **<sup>13</sup>C NMR (151 MHz, 300K, CDCl<sub>3</sub>)**  $\delta$  = 192.9, 156.6, 155.6, 155.5, 153.6, 144.2, 143.0, 139.0, 138.1, 136.6, 130.9, 130.3, 129.9, 128.2, 127.7, 127.5, 126.3, 124.4, 121.9, 116.2, 114.7, 108.7, 107.9, **HRMS (m/z):** 441.1736 [M+H]<sup>+</sup> (theor. calc. 441.1710 for C<sub>29</sub>H<sub>20</sub>N<sub>4</sub>O), **UV-Vis:** 288, 343 nm, **Extinction:** 3.8 · 10<sup>4</sup> M<sup>-1</sup>cm<sup>-1</sup>, **Emission:** 539 nm.

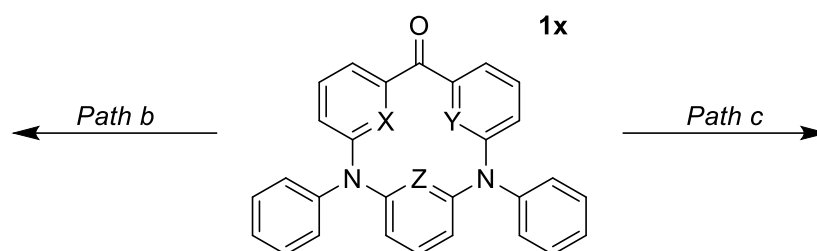

**Scheme S4.** Schematic representation of the Boron(III) insertion reactions.

### General procedure for Boron(III) insertion.<sup>[7]</sup>

**Path b:** A Schlenk tube was charged with a macrocycle **1a-e** (0.1 mmol), degassed toluene (10 mL) was added and the mixture was brought to reflux.  $\text{BBr}_3$  (10 equiv.) was added and allowed to reflux for additional 20 minutes. After this time, TEA (10 equiv.) was added and the reaction was refluxed for 2 hours. After that time, the reaction mixture was allowed to cool to room temperature and water (50 mL) was added. The mixture was extracted with  $\text{CH}_2\text{Cl}_2$  (3X30 mL), the collected organic phase was dried over  $\text{Na}_2\text{SO}_4$ , filtered and dried to solid. The solids were then purified with different methods.

**Path c:** A Schlenk tube was charged with a macrocycle **1a-e** (0.1 mmol) and degassed 1,2-dichlorobenzene (5 mL).  $\text{BBr}_3$  (10 equiv.) was added dropwise and the reaction was allowed to reflux for 5 hours. After that time, the reaction mixture was allowed to cool to room temperature and water (50 mL) was added. The mixture was extracted with  $\text{CH}_2\text{Cl}_2$  (3X30 mL), the collected organic phase was dried over  $\text{Na}_2\text{SO}_4$ , filtered and dried to solid. The solids were then purified with different methods.

**Macrocycle meso-bromine, 2a.** The product was obtained as an off white solid (column chromatography conditions: 100% *n*Hexane to 100%  $\text{CH}_2\text{Cl}_2$  with gradient), from starting material **1a**, following conditions from **Path b**.  **$^1\text{H}$  NMR (600 MHz, 300K,  $\text{CDCl}_3$ )**  $\delta$  7.80 (s, 2H), 7.13 – 7.05 (m, 2H), 7.03 (t,  $^3J = 8.1$  Hz, 1H), 6.92 (t,  $^3J = 7.8$  Hz, 2H), 6.79 (ddd,  $^3J = 8.2$ ,  $^4J = 2.3$ ,  $^4J = 0.8$  Hz, 2H), 6.65 (t,  $^3J = 7.0$  Hz, 3H), 6.63 (dd,  $^3J = 8.1$ ,  $^4J = 2.2$  Hz, 2H), 5.64 (s, 1H), 1.25 (s, 2H).  **$^{13}\text{C}$  NMR (150 MHz, 300K,  $\text{CDCl}_3$ )**  $\delta$  149.0, 148.4, 144.3, 144.1, 129.0, 128.5, 127.8, 124.5, 123.7, 122.9, 120.7, 120.2, 117.9, 116.0, 28.9. **HRMS (m/z):** 927.27735  $[\text{M}+\text{H}]^+$ , **UV-Vis:** 298 nm, **Extinction:**  $5.9 \cdot 10^4 \text{ M}^{-1}\text{cm}^{-1}$ , **Emission:** 402 nm.

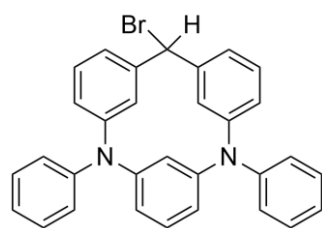

**Fused Dimer, 3.** The product was obtained in 49% yield as a dark green-brown solid, from starting material **1d**, following conditions from **Path b**. The product was purified using a SEC chromatography (eluent: THF) and precipitation ( $\text{CH}_2\text{Cl}_2/n$ Hexane).  **$^1\text{H}$  NMR (600 MHz,  $\text{CD}_3\text{OD}$ )**  $\delta$  = 9.01 (d,  $^3J = 10.1$  Hz, 2H), 8.14 (dd,  $^3J = 8.8$  Hz, 7.9 Hz, 2H), 7.95-7.77 (m, 14H), 7.72 (d,  $^3J = 7.2$  Hz, 2H), 7.64-7.56 (m, 6H), 7.34 (t,  $^3J = 8.2$  Hz, 2H), 7.24 (d,  $^3J = 10.1$  Hz, 2H), 7.03 (d,  $^3J = 9.1$  Hz, 2H), 6.52 (d,  $^3J = 8.2$  Hz, 2H), 6.45 (d,  $^3J = 8.2$  Hz, 2H).  **$^{13}\text{C}$  NMR (151 MHz,  $\text{CD}_3\text{OD}$ )**  $\delta$  = 153.0, 151.6, 143.7, 143.4, 142.7, 141.9, 140.6, 139.0, 138.7, 135.9, 133.6, 133.1, 132.8, 132.4, 131.9, 131.3, 130.9, 129.7, 125.8, 123.6, 118.9, 117.1, 113.7, 113.5. **HRMS (m/z):** 450.16112

<sup>[7]</sup> M. Kijewska, M. Siczek, and M. Pawlicki, *Org. Lett.*, **2021**, 23, 9, 3652-3656.

$[M]^{+2}$  (theor. calc. 450.16466 for  $C_{58}H_{38}B_2N_8O_2$ ), **UV-Vis**: 309, 389, 460, 486, 580 nm, **Extinction**:  $2.5 \cdot 10^4 M^{-1}cm^{-1}$ , **Emission**: 637 nm.

**Fused dimer, 4.** The product was obtained in 44% yield as a dark red-brown solid, from starting

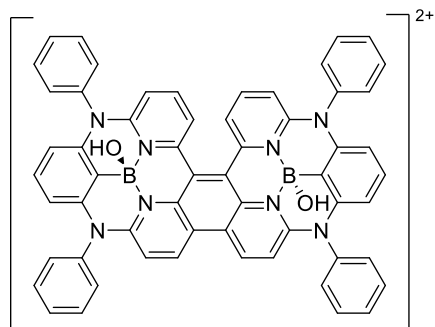

material **1d**, following conditions from **Path c**. The product was purified using SEC chromatography (eluent: THF) and precipitation ( $CH_2Cl_2/n$ Hexane).  **$^1H$  NMR (600 MHz,  $CD_3OD$ )**  $\delta$  = 9.13 (d,  $^3J$  = 9.9 Hz, 1H), 7.83 (m, 10H), 7.68 (d,  $^3J$  = 7.4 Hz, 1H), 7.65 (d,  $^3J$  = 7.2 Hz, 1H), 7.30 (m, 2H), 6.95 (d,  $^3J$  = 9.0 Hz, 1H), 6.46 (d,  $^3J$  = 8.2 Hz, 1H), 6.42 (d,  $^3J$  = 8.2 Hz, 1H).  **$^{13}C$  NMR (151 MHz,  $CD_3OD$ )**  $\delta$  = 152.2, 151.5, 149.1, 148.0, 146.7, 144.8, 143.4, 142.4, 139.2, 139.1, 137.6, 133.0, 132.2, 131.9, 131.1, 131.0, 129.0, 125.1,

121.9, 119.2, 117.5, 113.4, 113.4. **HRMS (m/z)**: 450.1695  $[M]^{+2}$  (theor. calc. 450.1655 for  $C_{58}H_{38}B_2N_8O_2$ ), **UV-Vis**: 311, 368, 382, 448, 472, 554 nm, **Extinction**:  $3.2 \cdot 10^4 M^{-1}cm^{-1}$ , **Emission**: 614 nm.

**Fused Tetramer, 3-O-3.** The product was obtained as result of slow conversion from mono

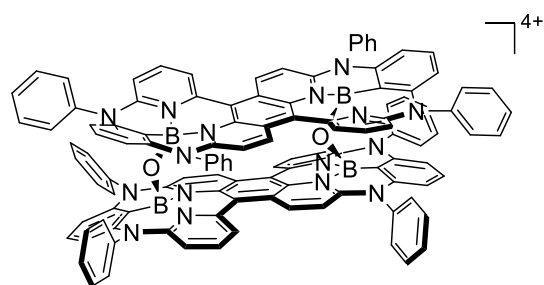

layered system **3** with the elimination of 2 molecules of  $H_2O$ . **HRMS (m/z)**: 441.15866  $[M]^{+4}$  (theor. calc. 441.16111 for  $C_{116}H_{72}B_4N_{16}O_2$ ), **UV-Vis**: 303, 388, 455, 481, 580 nm, **Extinction**:  $2.4 \cdot 10^4 M^{-1}cm^{-1}$ .

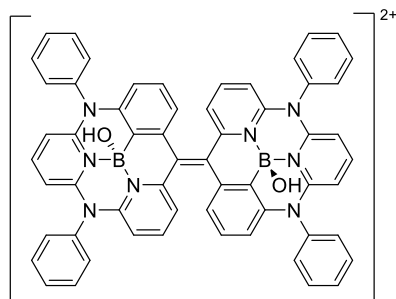

**Dimer, 5.** The product was obtained in 51% yield as a dark green solid, from starting material **1e**, following conditions from **Path c** (using longer reaction time, 18 hours). The product was purified using a preparative HPLC (eluent: acetonitrile and  $H_2O$  with TFA).  **$^1H$  NMR (500 MHz,  $CD_3OD$ )**  $\delta$  = 7.88-7.69 (m, 20H), 7.56 (d,  $^3J$  = 7.2 Hz, 4H), 7.41 (dd,  $^3J$  = 7.8,  $^4J$  = 0.8 Hz, 2H), 7.09 (dd,  $^3J$  = 8.3, 7.7 Hz, 2H), 6.93 (d,  $^3J$  = 7.6 Hz, 2H), 6.79 (dd,  $^3J$  = 8.8,  $^4J$  = 0.8 Hz, 2H), 6.44 (d,  $^3J$  = 8.4 Hz, 2H), 6.35 (dd,  $^3J$  = 8.8,  $^4J$  = 0.6 Hz, 2H), 6.14 (dd,  $^3J$  =

8.2,  $^4J$  = 0.6 Hz, 2H).  **$^{13}C$  NMR (126 MHz,  $CD_3OD$ )**  $\delta$  = 151.7, 150.8, 150.7, 149.4, 144.8, 144.0, 143.3, 139.6, 138.0, 136.40, 136.38, 133.2, 132.8, 132.7, 131.6, 131.0, 130.8, 130.2, 124.5, 124.0, 117.8, 116.5, 108.6, 104.3. **HRMS (m/z)**: 451.1761  $[M]^{+2}$  (theor. calc. 451.1734 for  $C_{58}H_{40}B_2N_8O_2$ ), **UV-Vis**: 284, 375 nm, **Extinction**:  $1.7 \cdot 10^4 M^{-1}cm^{-1}$ , **Emission**: 630 nm.

*B,N*-doped PAHs from Tridentate 'Defects' - a Bottom-up Convergent Approach for  $\pi$ -Extended Systems  
 Marco Farinone, Monika Kijewska, Joanna Cybińska, Miłosz Siczek and Miłosz Pawlicki

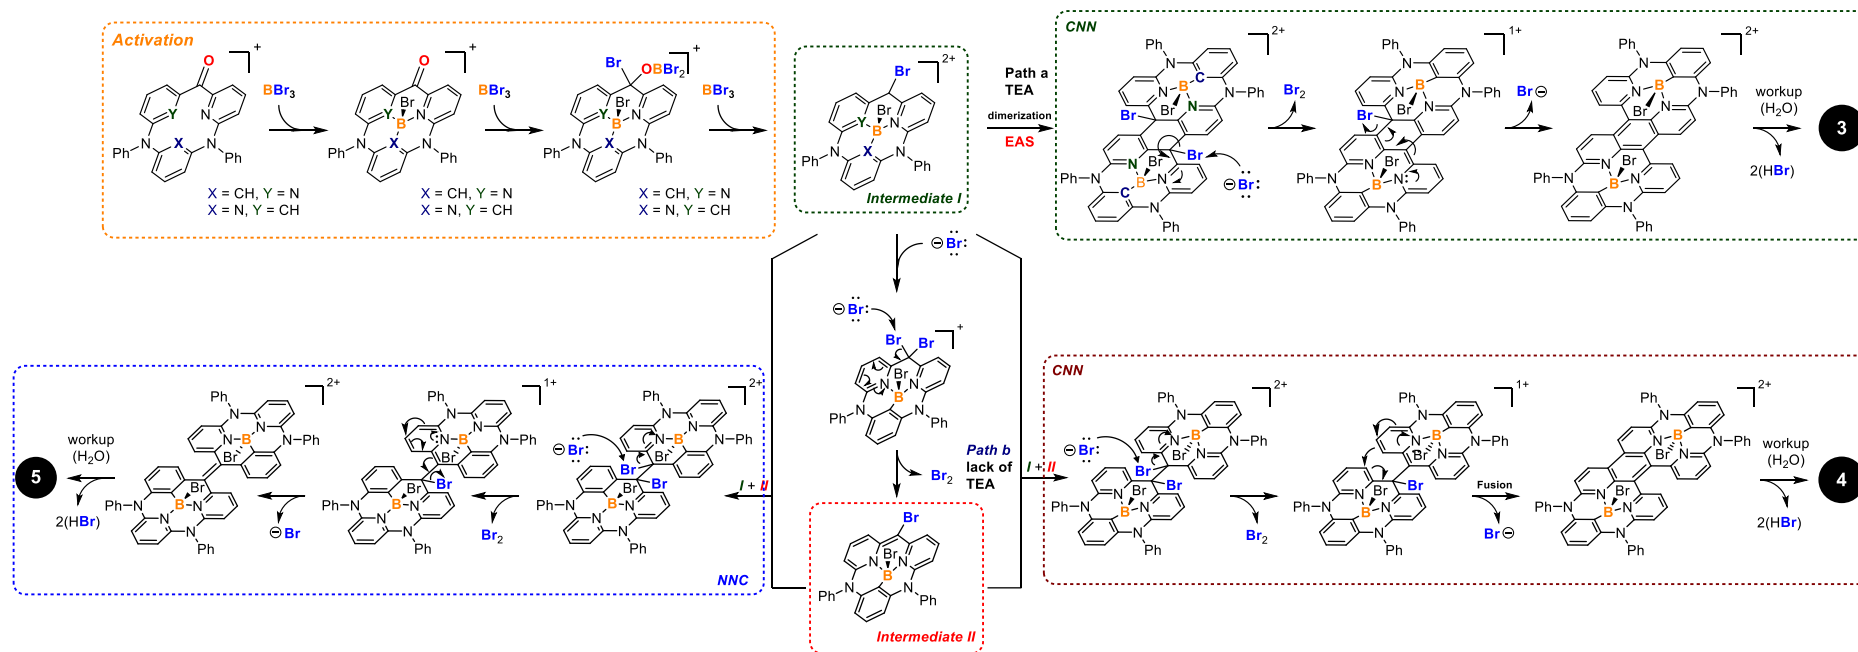

Scheme S5. Plausible mechanism.

### 3. NMR spectra

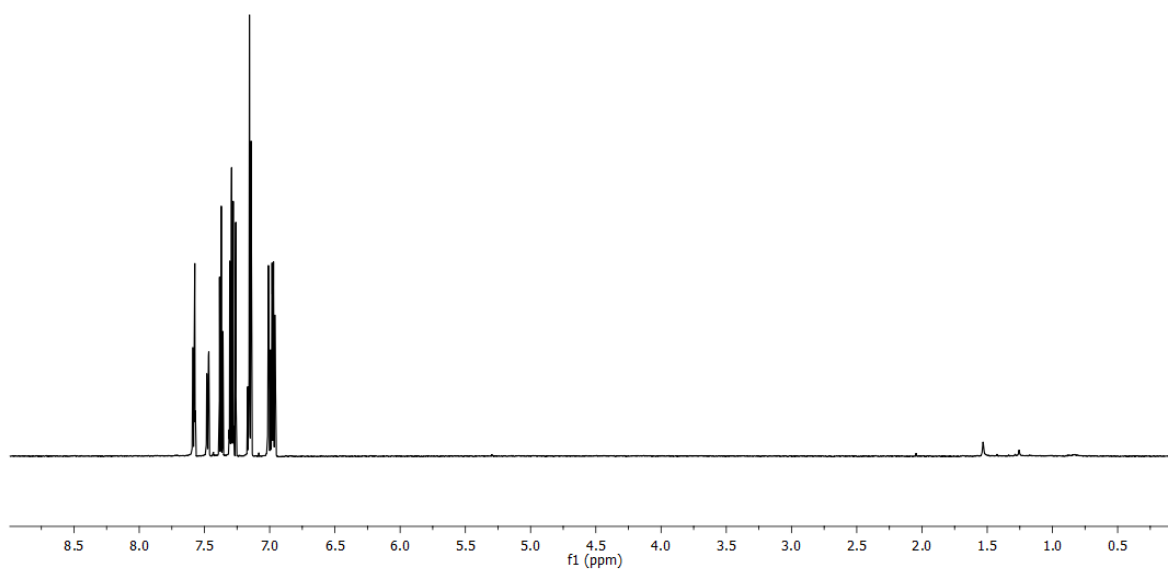

Figure S1.  $^1\text{H}$  NMR spectrum of **1a** ( $\text{CDCl}_3$ , 300K, 600 MHz).

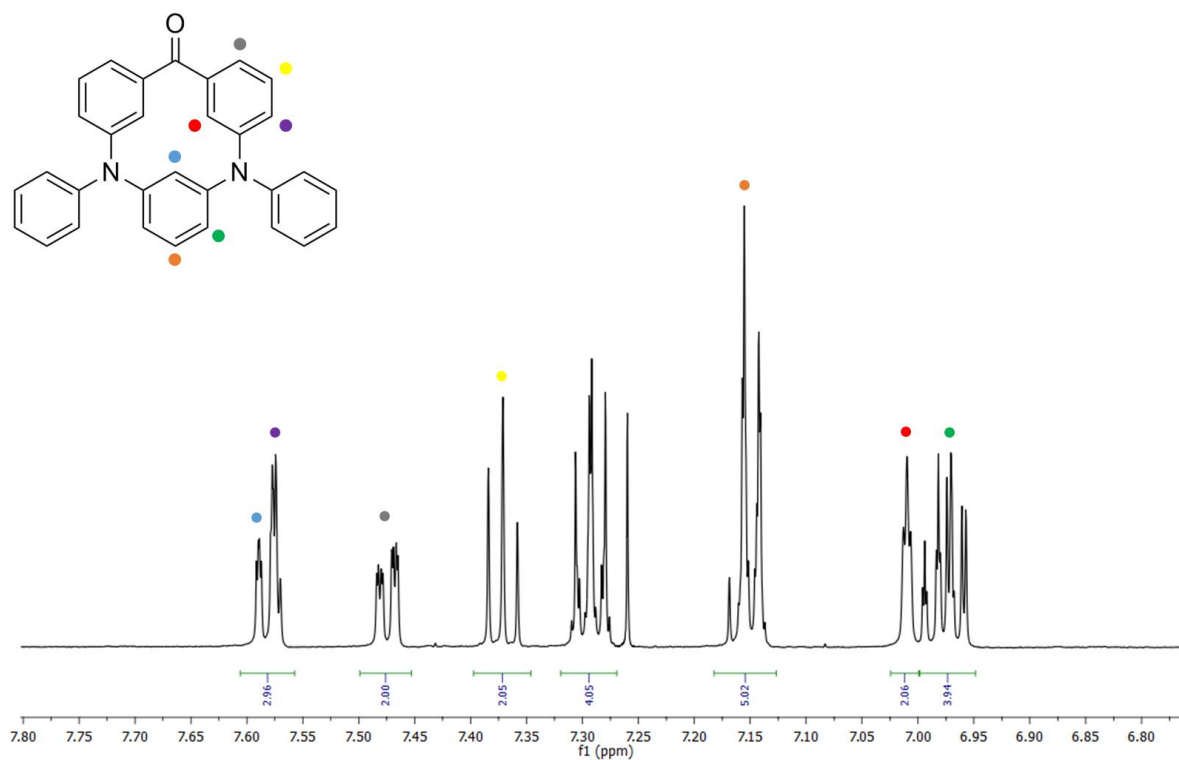

Figure S2.  $^1\text{H}$  NMR spectrum (zoom, aromatic region) of **1a** ( $\text{CDCl}_3$ , 300K, 600 MHz).

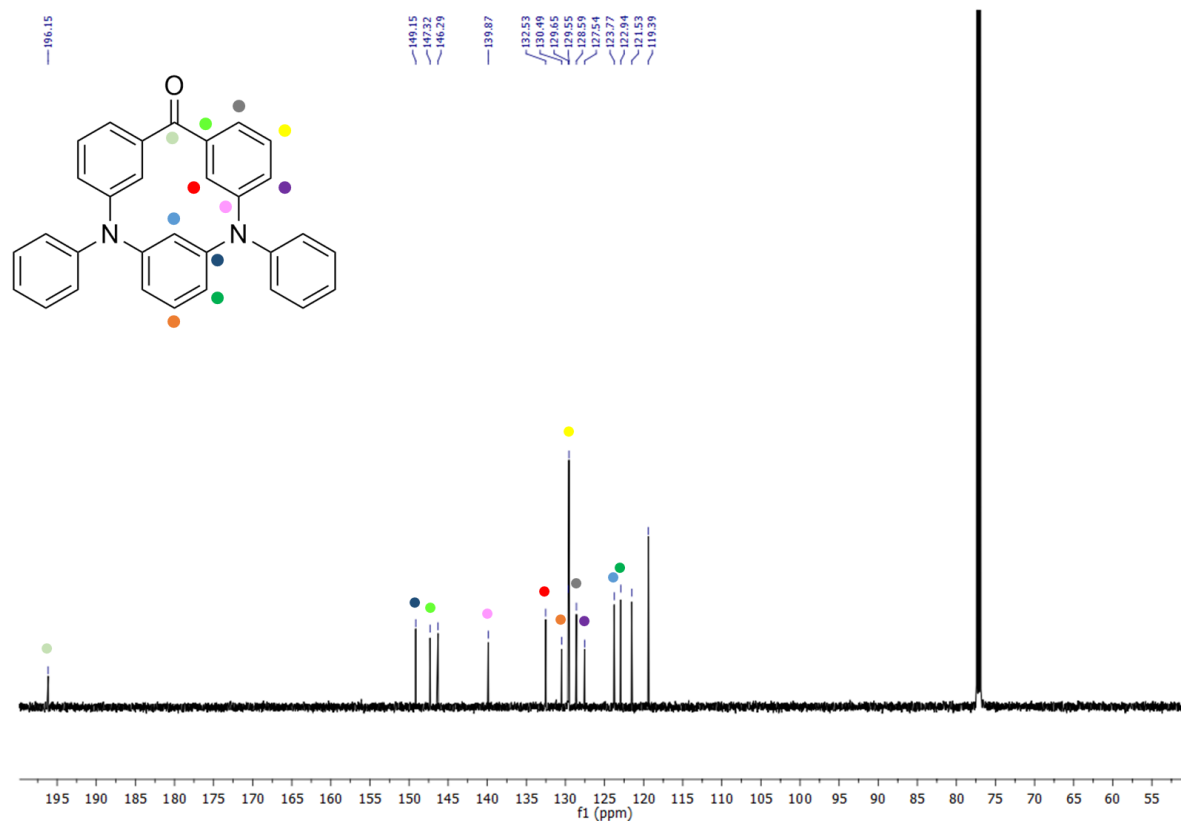

**Figure S3.**  $^{13}\text{C}$  NMR spectrum of **1a** ( $\text{CDCl}_3$ , 300K, 151 MHz).

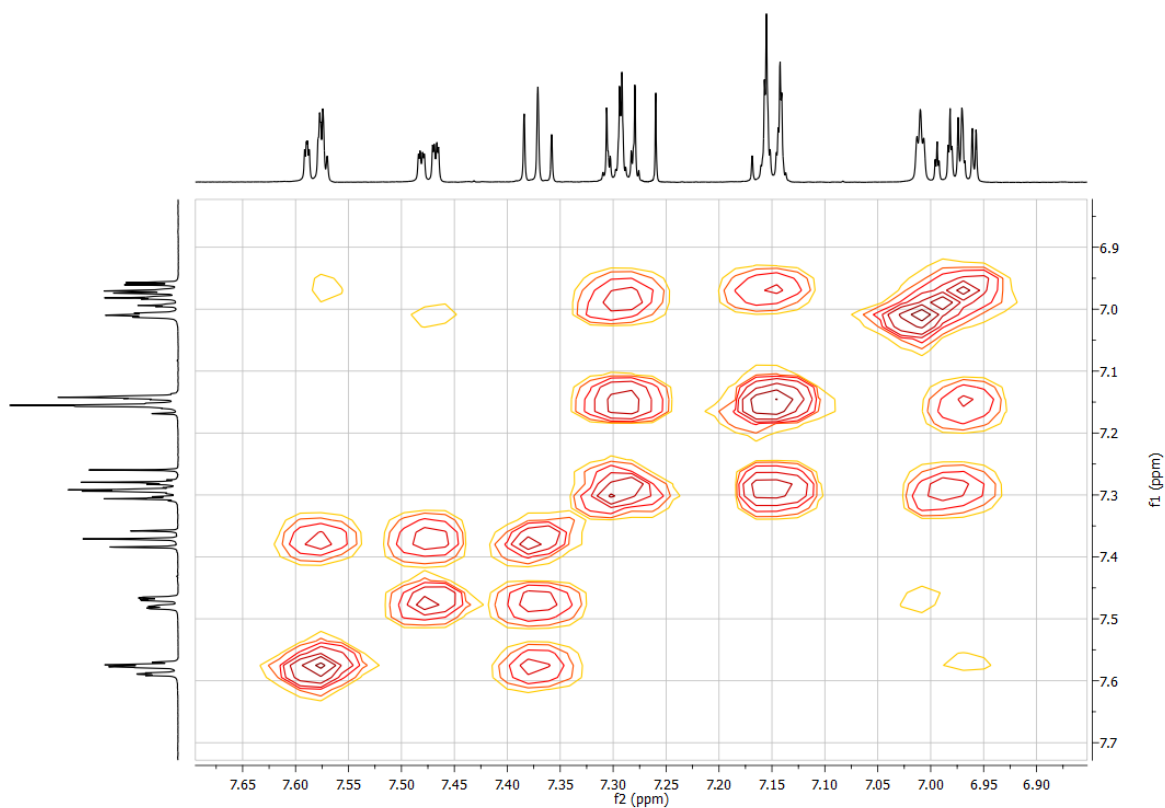

**Figure S4.** COSY NMR spectrum of **1a** ( $\text{CDCl}_3$ , 300K, 600 MHz).

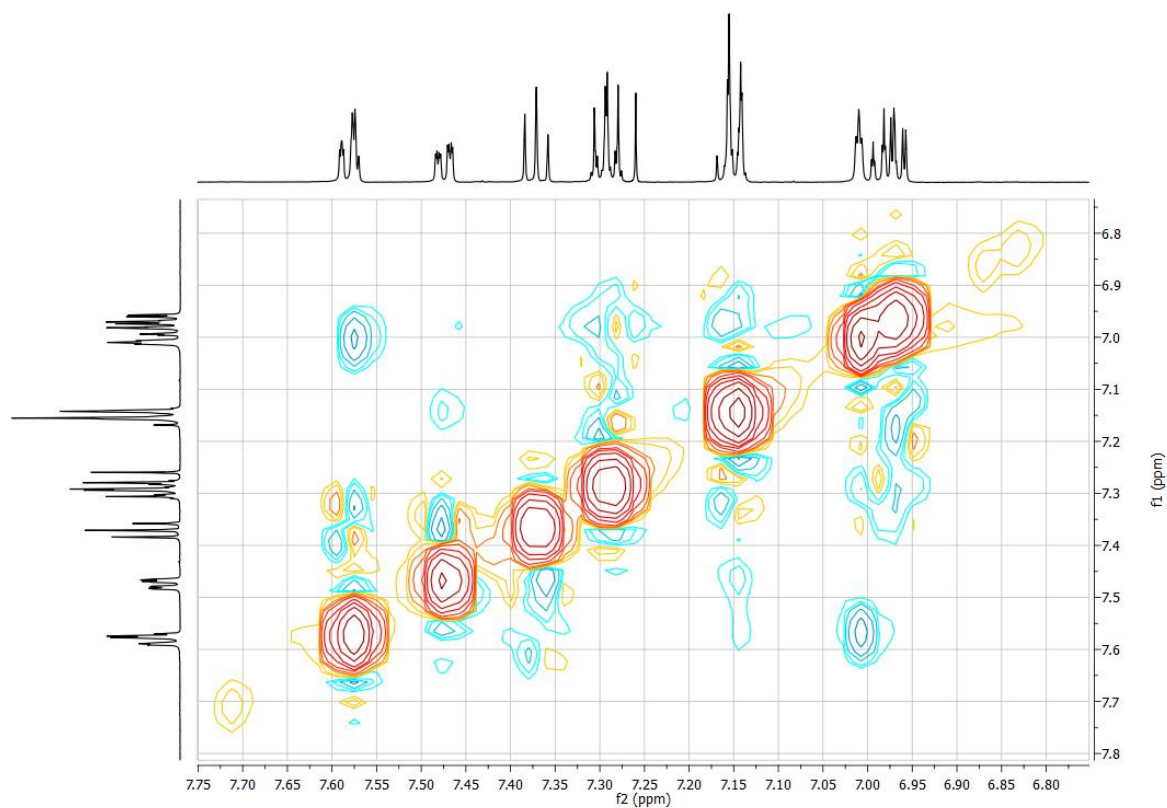

Figure S5. NOESY NMR spectrum of **1a** (CDCl<sub>3</sub>, 300K, 600 MHz).

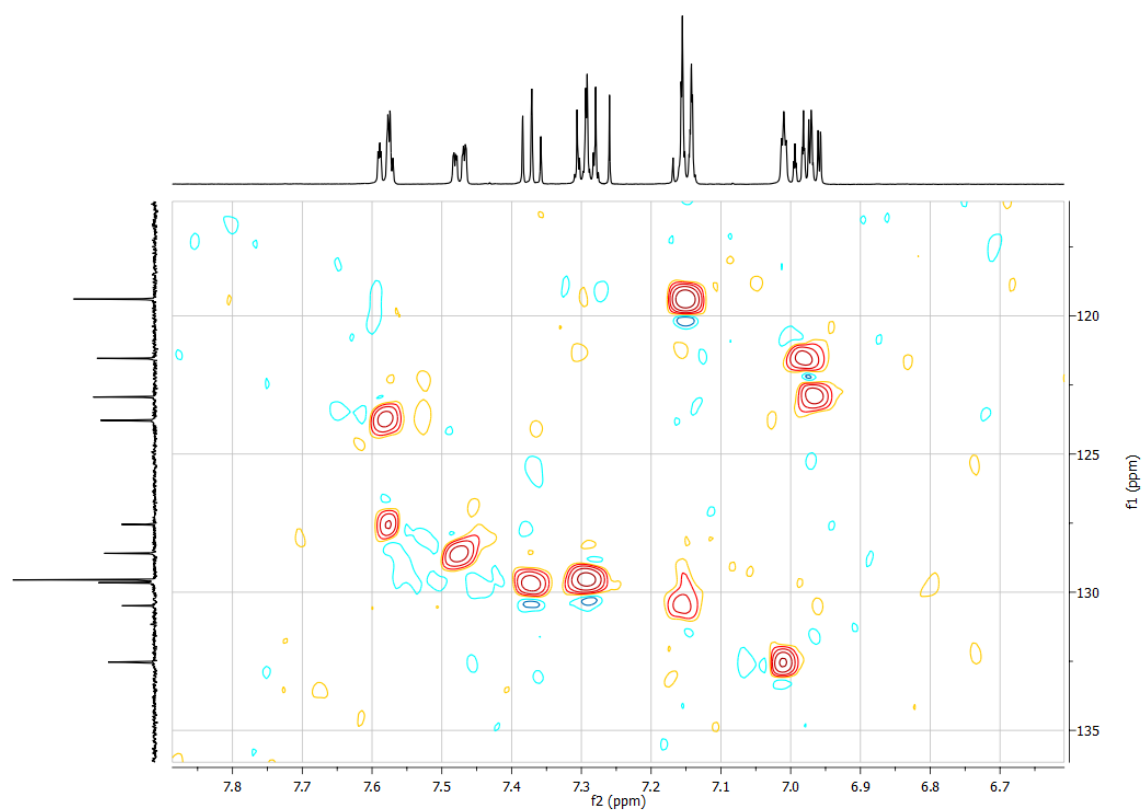

Figure S6. HSQC NMR spectrum of **1a** (CDCl<sub>3</sub>, 300K, 600, 151 MHz).



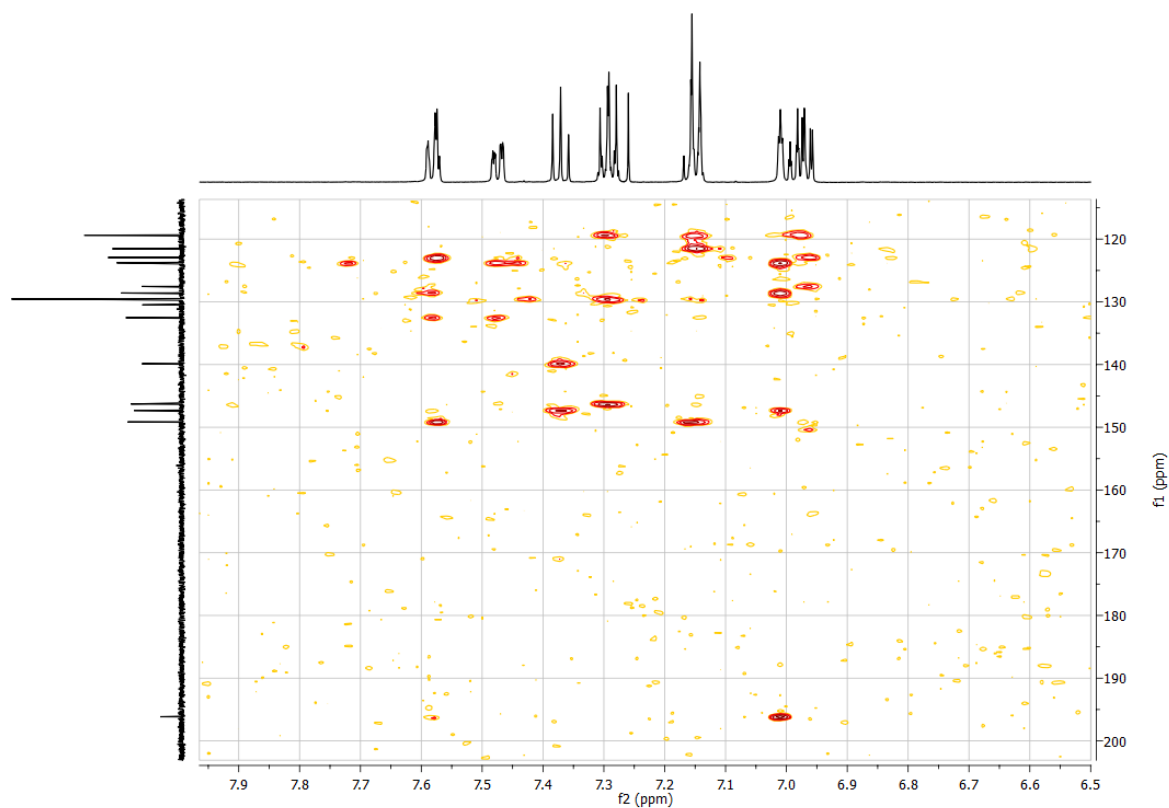

Figure S7. HMBC NMR spectrum of **1a** (CDCl<sub>3</sub>, 300K, 600, 151 MHz).

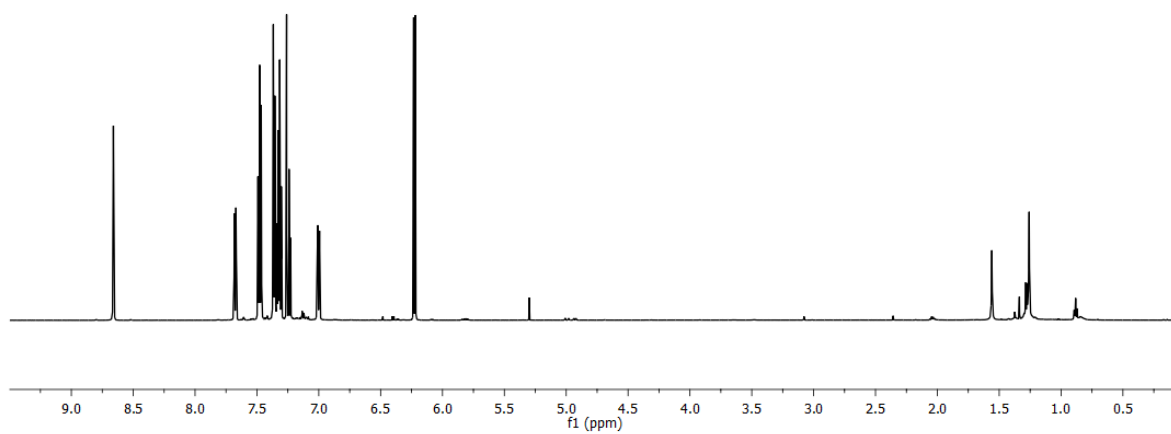

Figure S8. <sup>1</sup>H NMR spectrum of **1b** (CDCl<sub>3</sub>, 300K, 600 MHz).

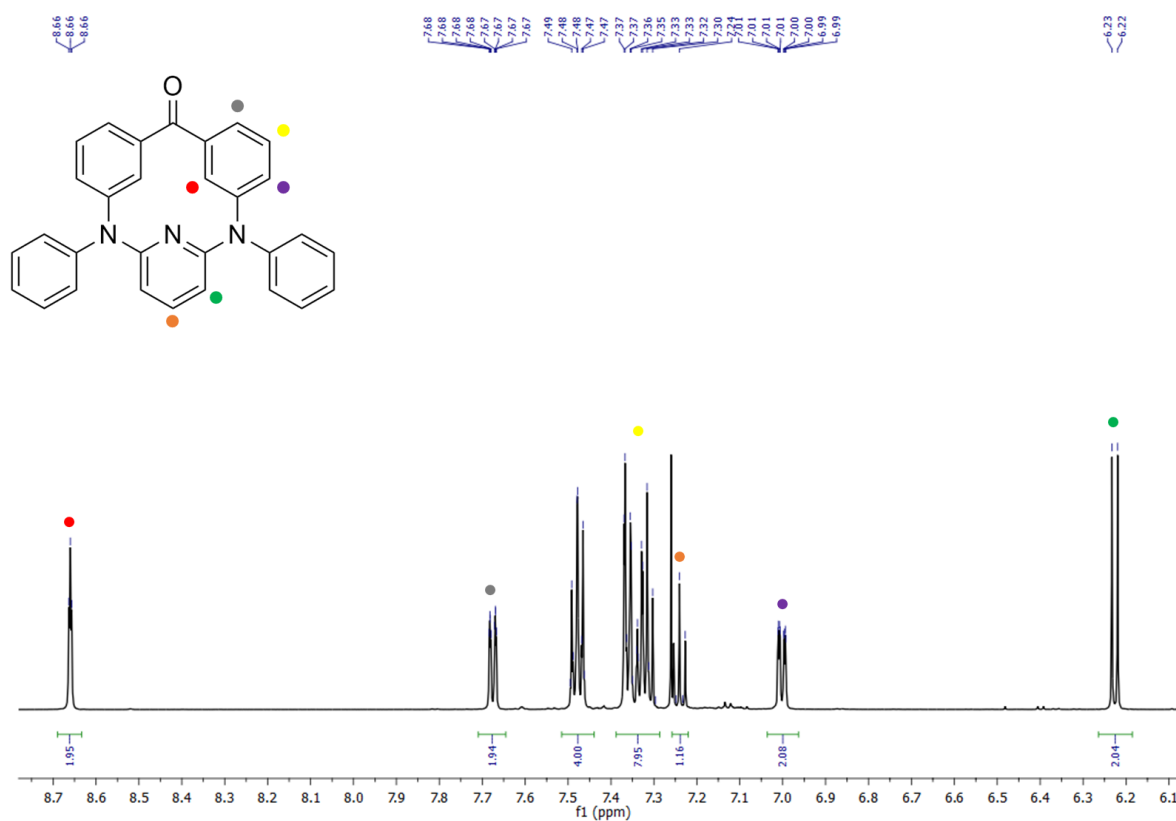

Figure S9.  $^1\text{H}$  NMR spectrum (zoom, aromatic region) of **1b** ( $\text{CDCl}_3$ , 300K, 600 MHz).

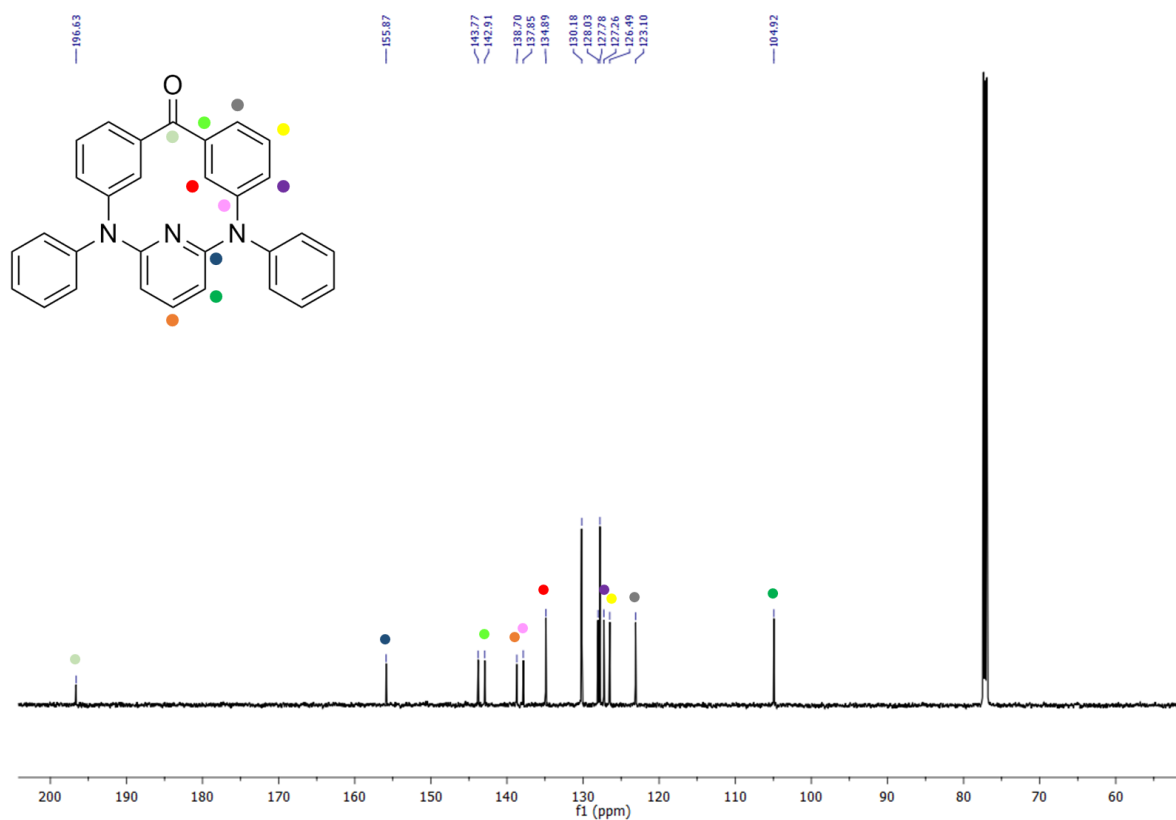

Figure S10.  $^{13}\text{C}$  NMR spectrum of **1b** ( $\text{CDCl}_3$ , 300K, 151 MHz).

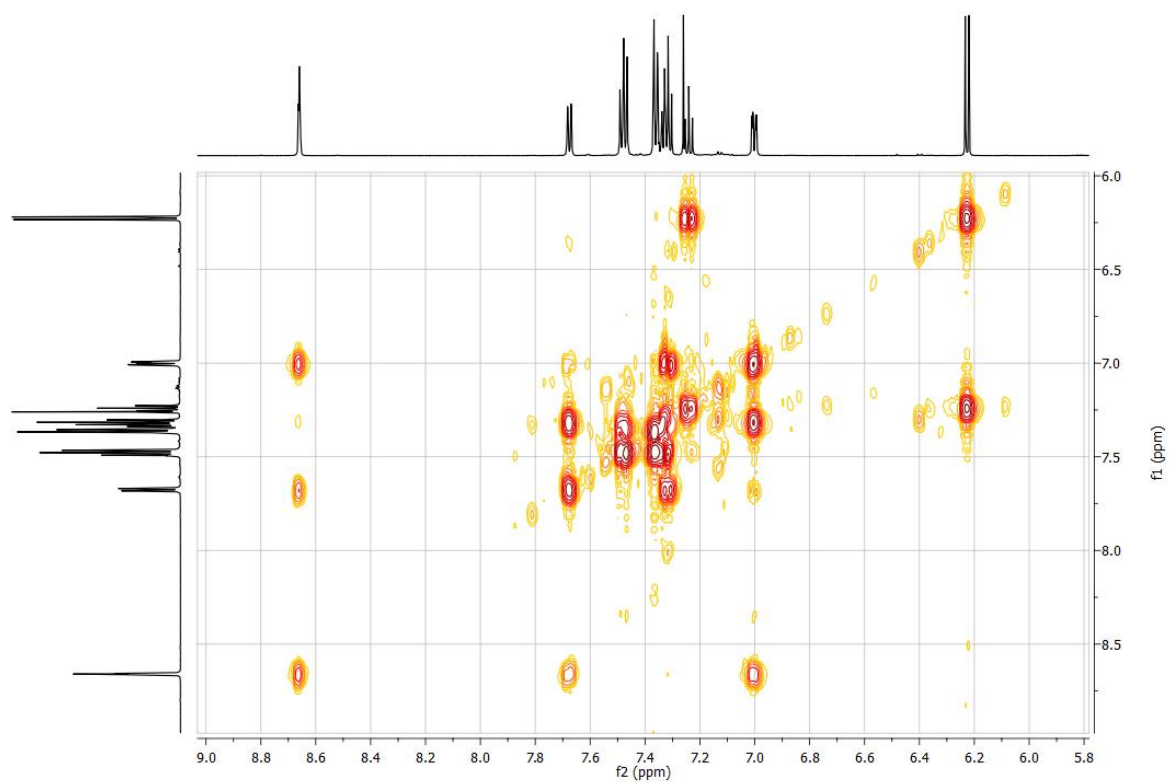

Figure S11. COSY NMR spectrum of **1b** (CDCl<sub>3</sub>, 300K, 600 MHz).

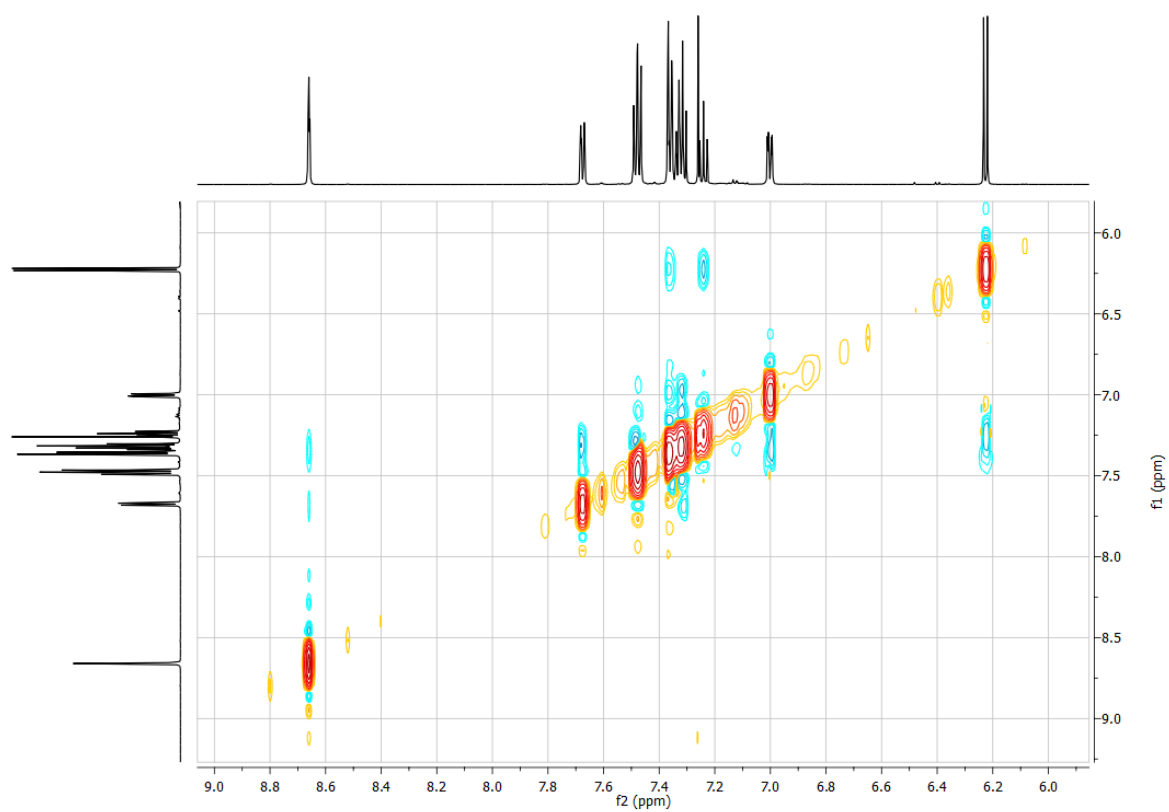

Figure S12. NOESY NMR spectrum of **1b** (CDCl<sub>3</sub>, 300K, 600 MHz).

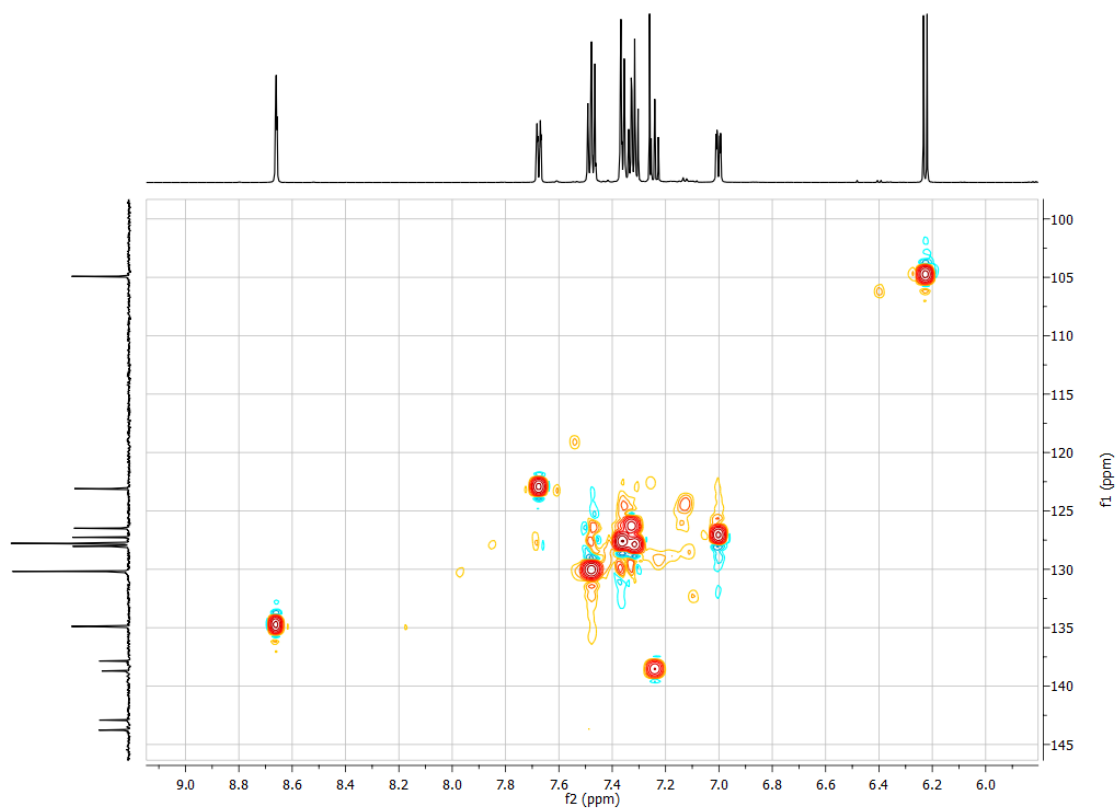

Figure S13. HSQC NMR spectrum of **1b** (CDCl<sub>3</sub>, 300K, 600, 151 MHz).

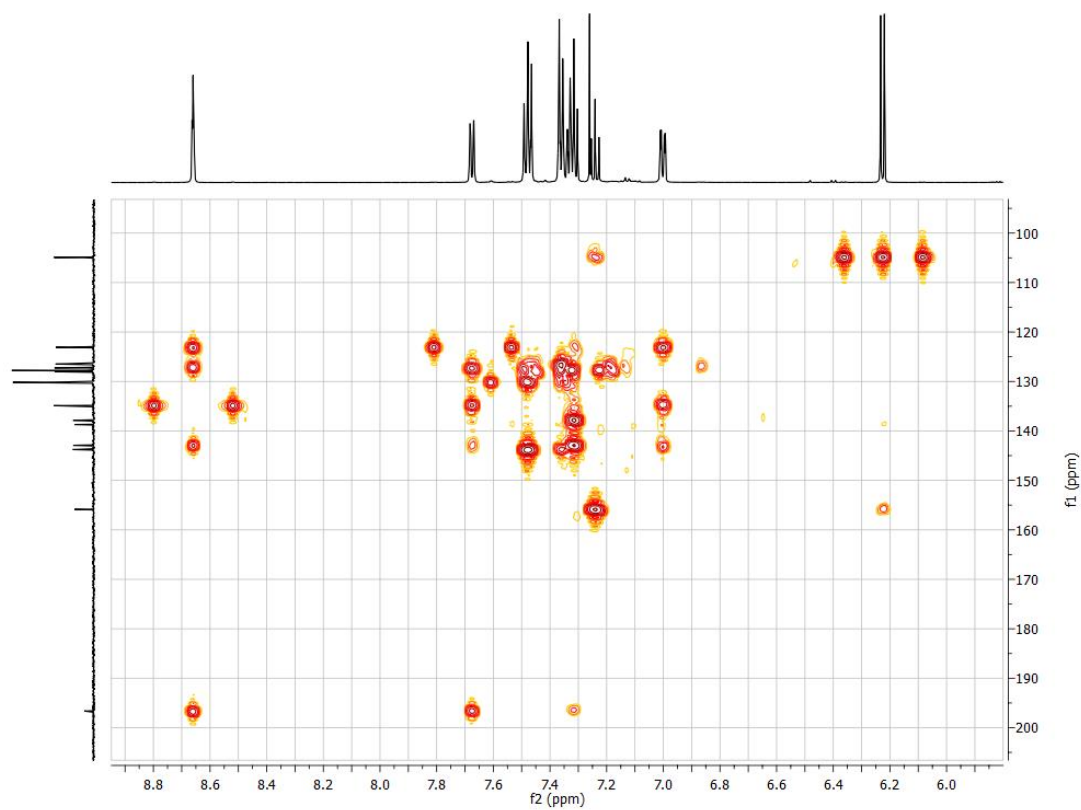

Figure S14. HMBC NMR spectrum of **1b** (CDCl<sub>3</sub>, 300K, 600, 151 MHz).

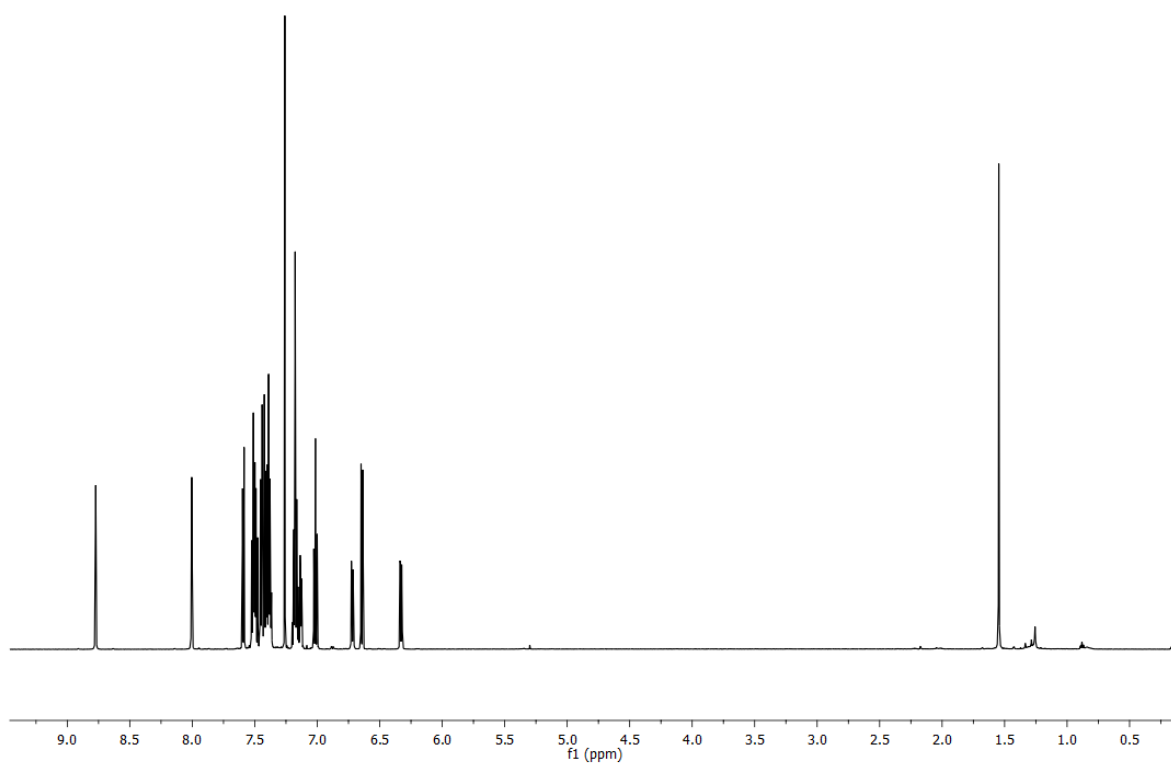

Figure S15.  $^1\text{H}$  NMR spectrum of **1c** ( $\text{CDCl}_3$ , 300K, 600 MHz).

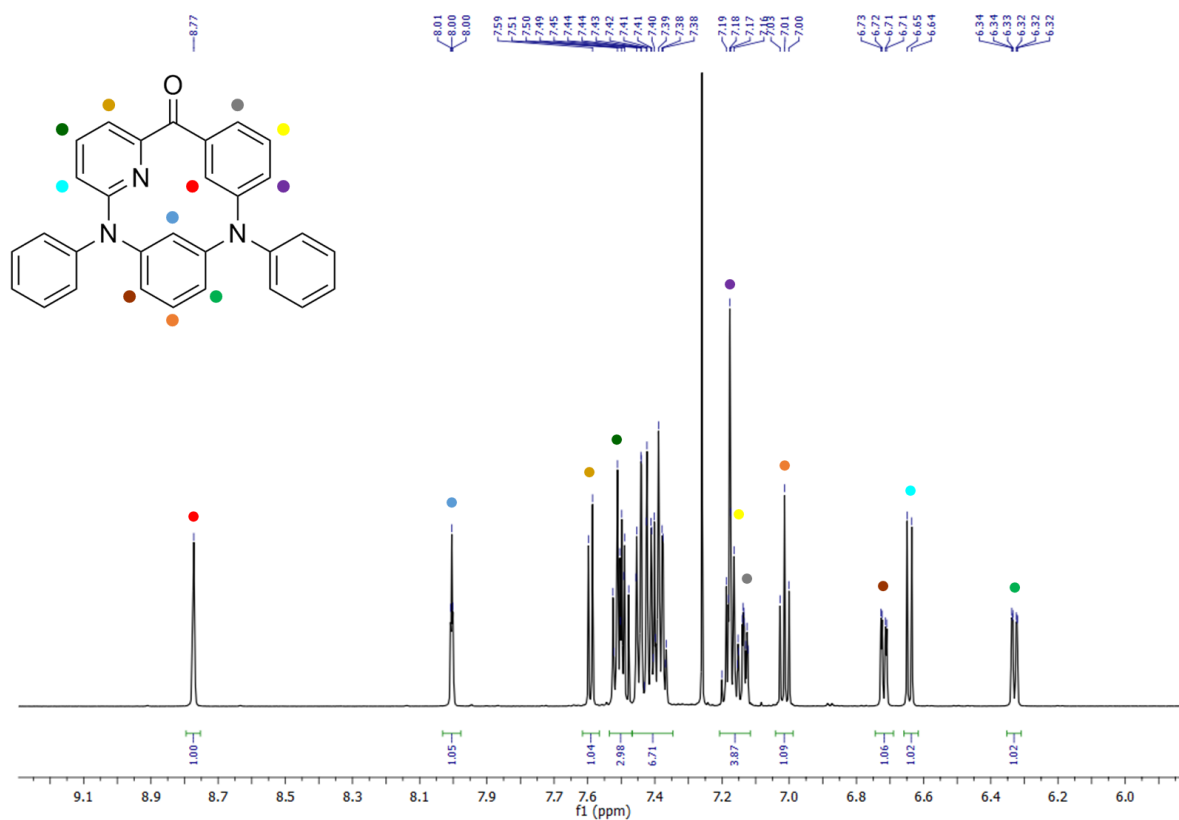

Figure S16.  $^1\text{H}$  NMR spectrum (zoom, aromatic region) of **1c** ( $\text{CDCl}_3$ , 300K, 600 MHz).

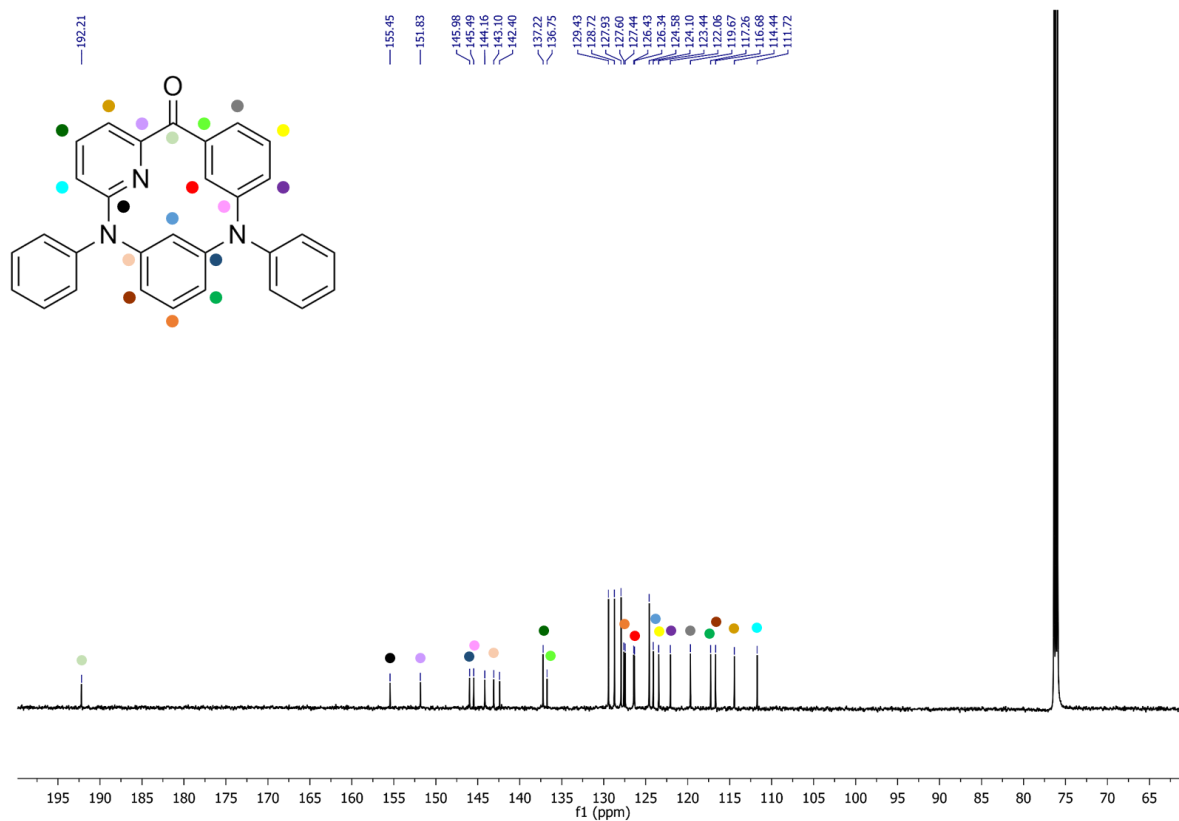

Figure S17.  $^{13}\text{C}$  NMR spectrum of **1c** (CDCl<sub>3</sub>, 300K, 151 MHz).

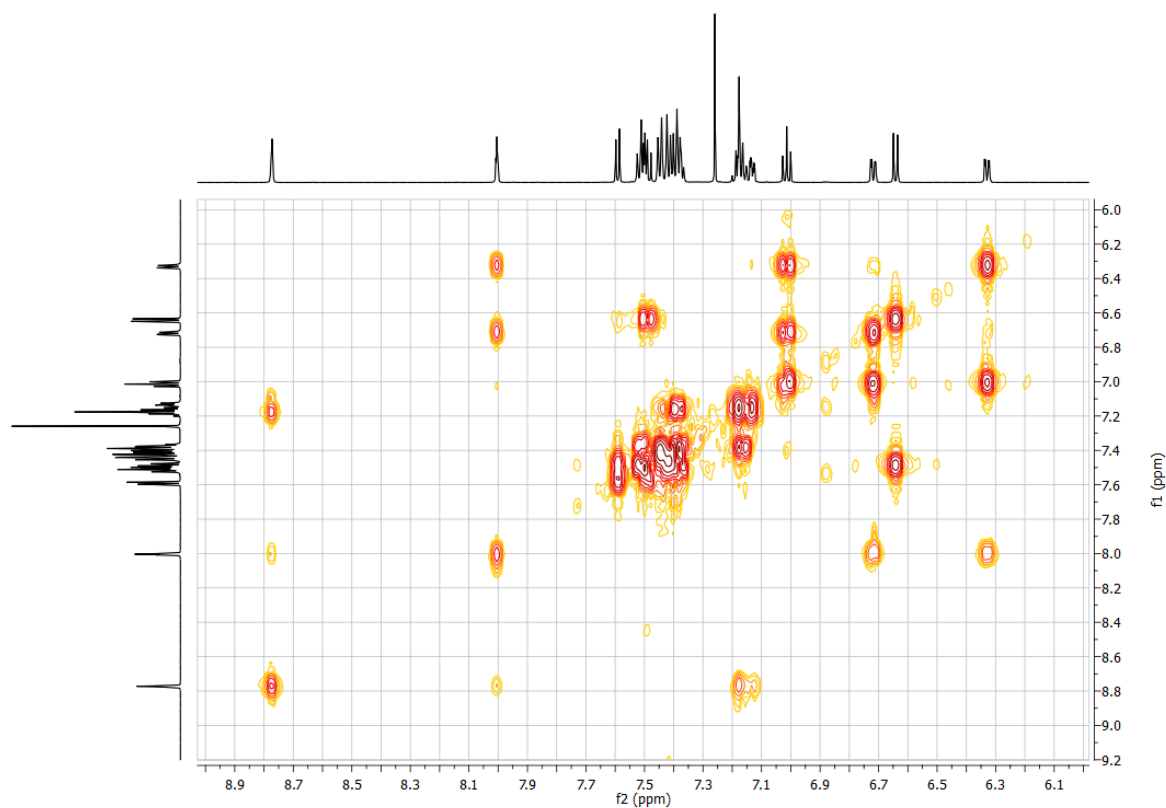

Figure S18. COSY NMR spectrum of **1c** (CDCl<sub>3</sub>, 300K, 600 MHz).

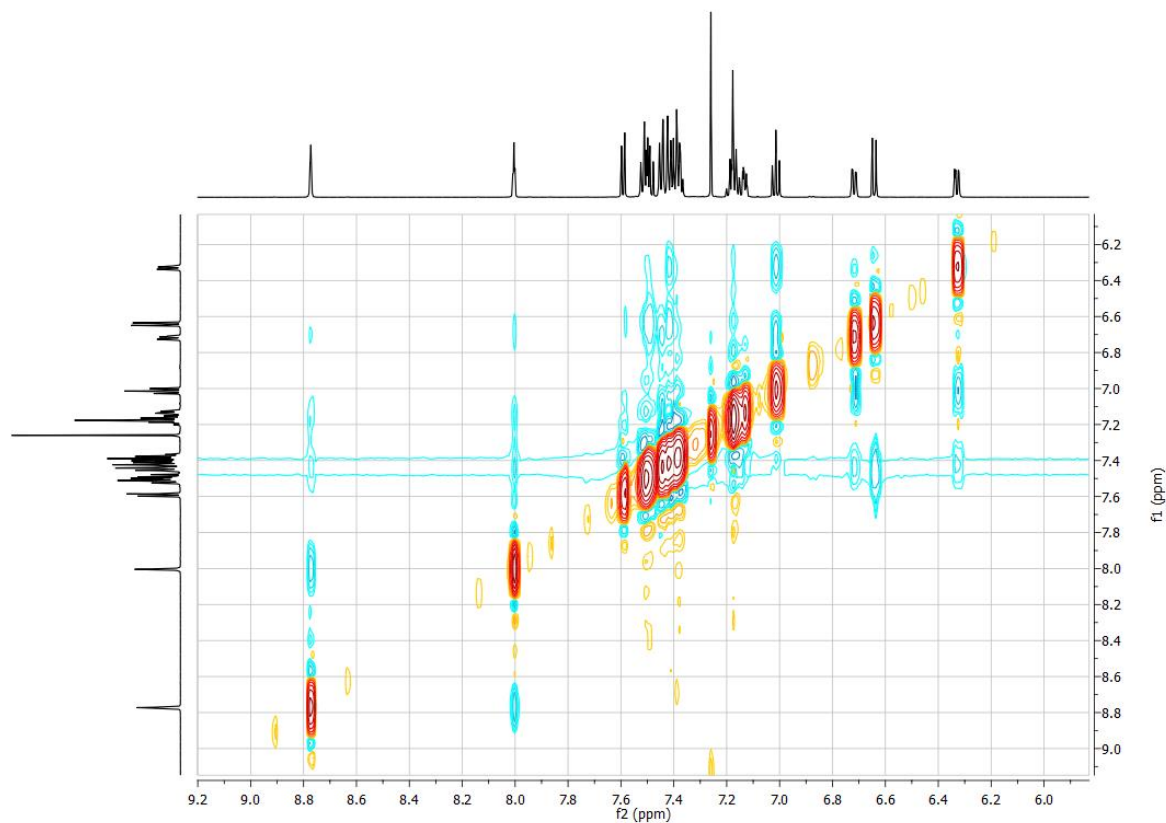

**Figure S19.** NOESY NMR spectrum of **1c** (CDCl<sub>3</sub>, 300K, 600 MHz).

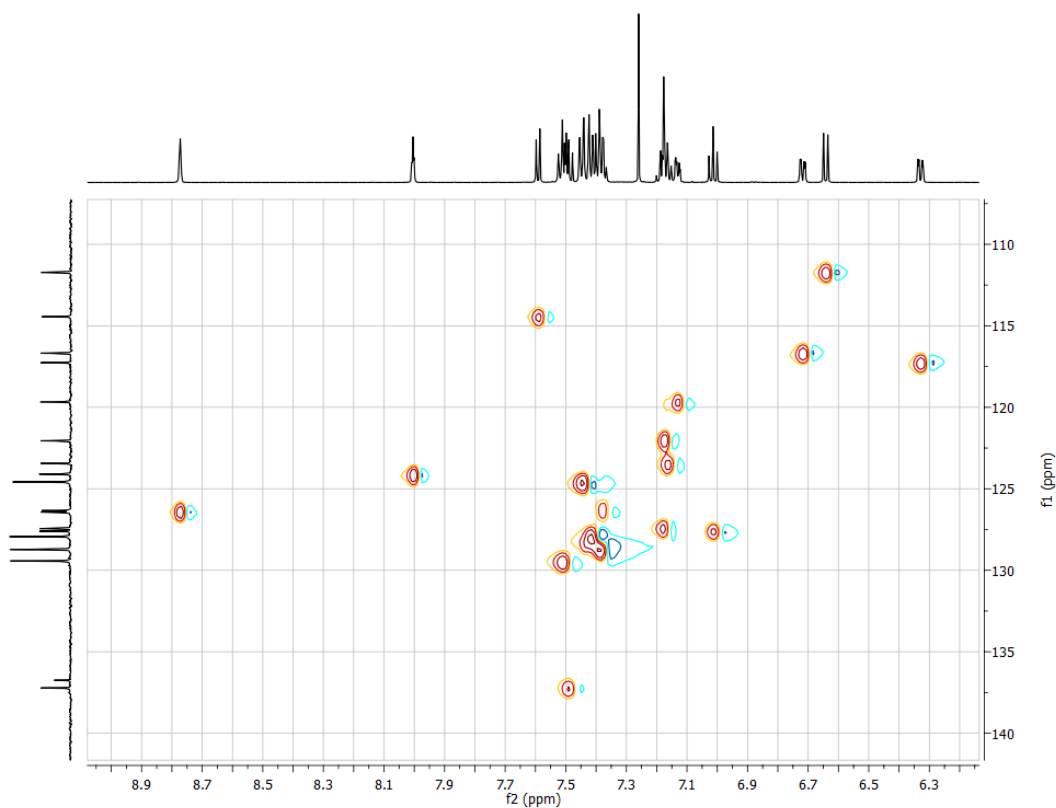

**Figure S20.** HSQC NMR spectrum of **1c** (CDCl<sub>3</sub>, 300K, 600, 151 MHz).

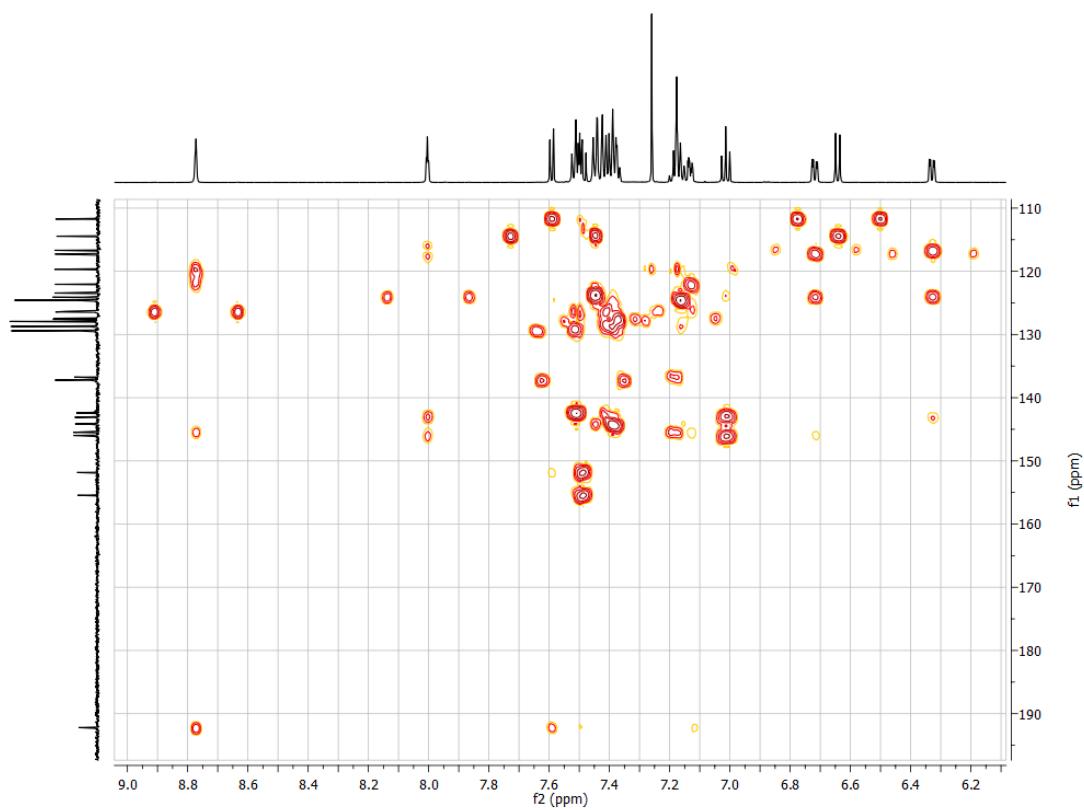

Figure S21. HMBC NMR spectrum of **1c** (CDCl<sub>3</sub>, 300K, 600, 151 MHz).

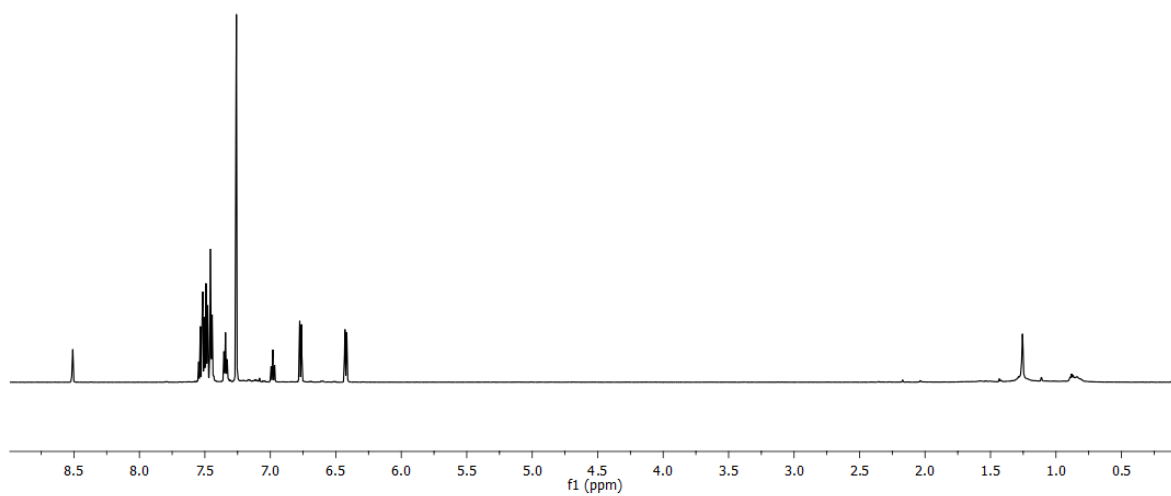

Figure S22. <sup>1</sup>H NMR spectrum of **1d** (CDCl<sub>3</sub>, 300K, 600 MHz).



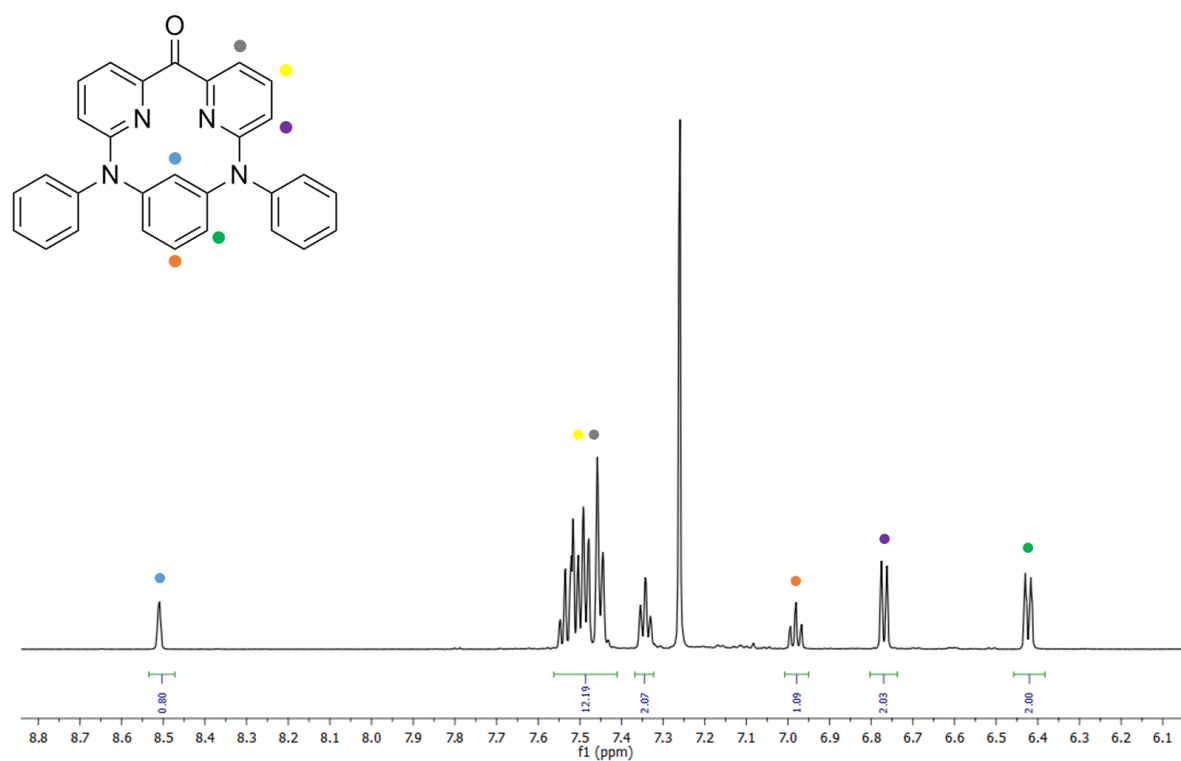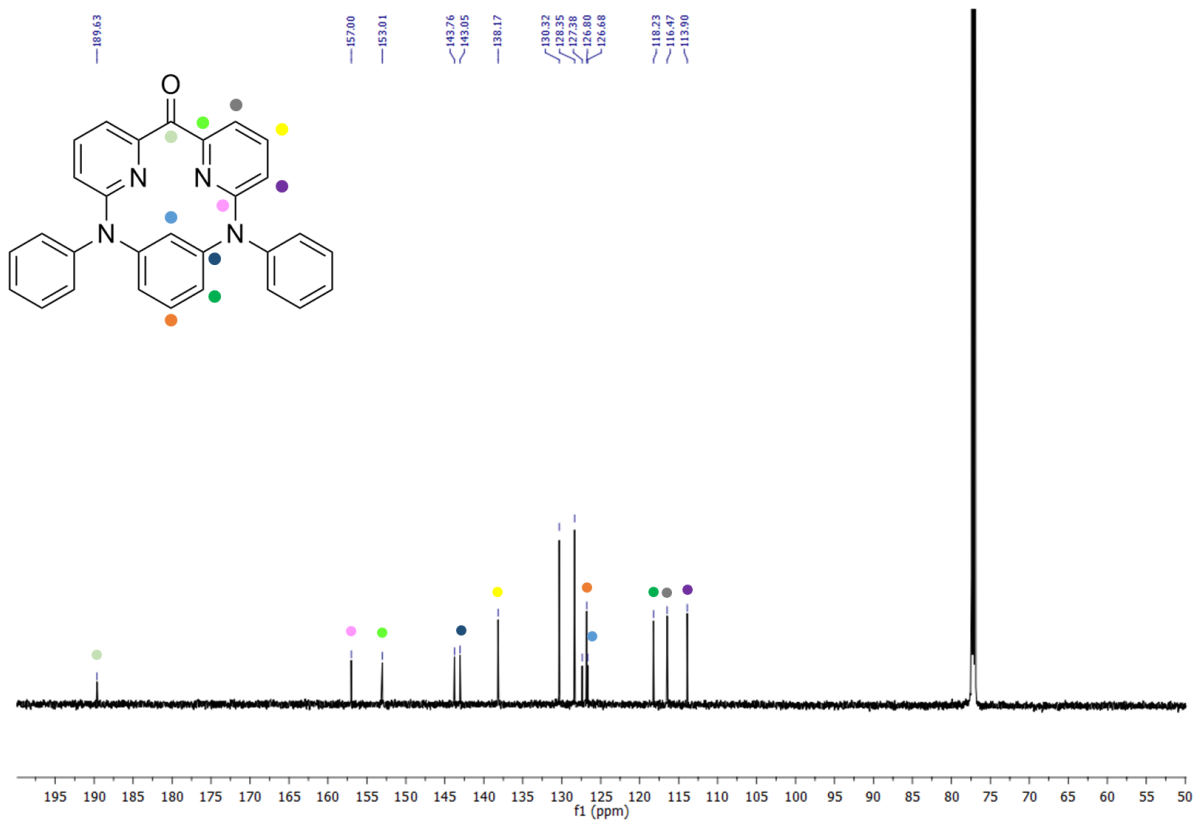

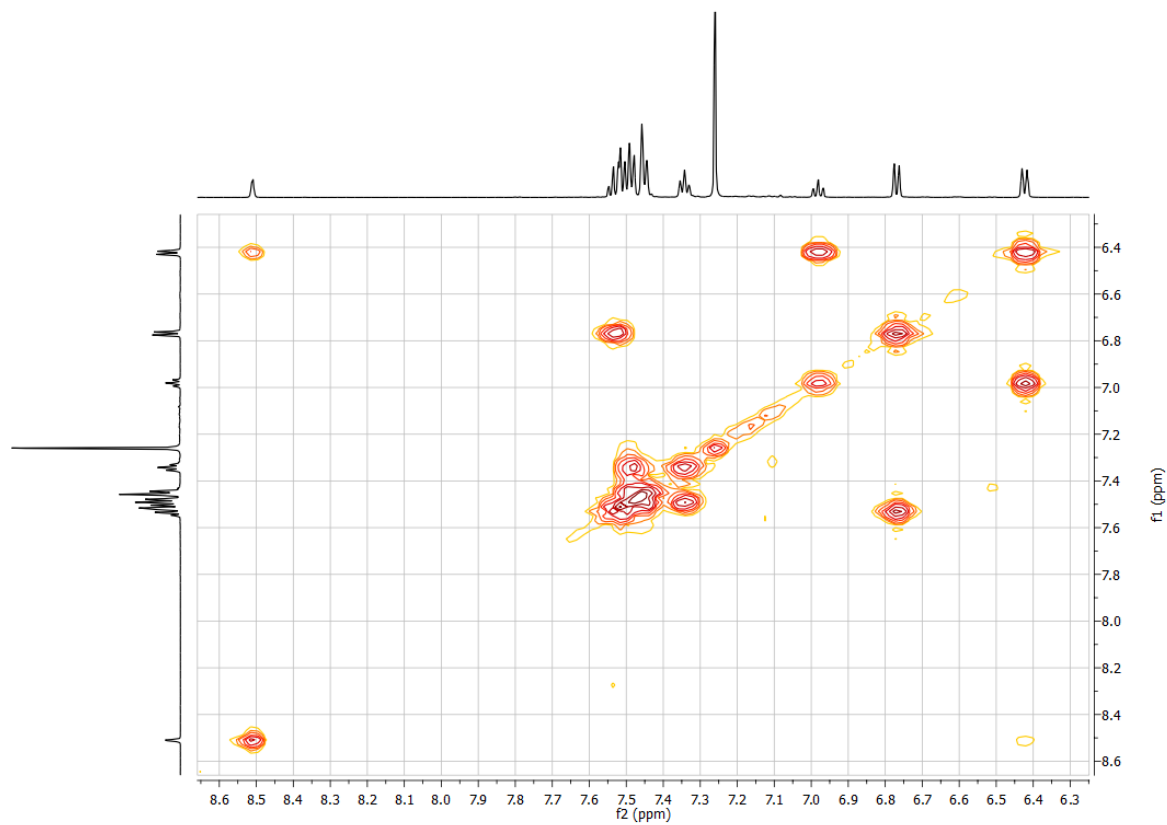

Figure S25. COSY NMR spectrum of **1d** (CDCl<sub>3</sub>, 300K, 600 MHz).

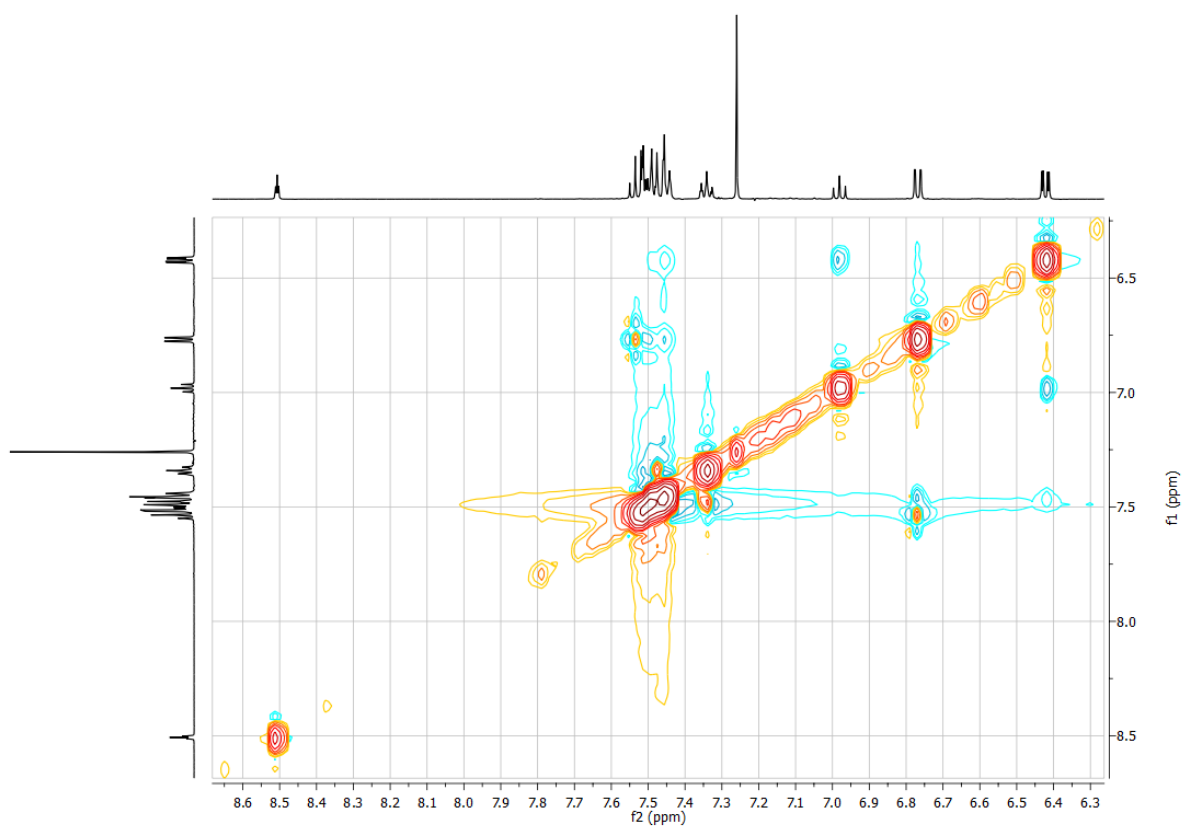

Figure S26. NOESY NMR spectrum of **1d** (CDCl<sub>3</sub>, 300K, 600 MHz).

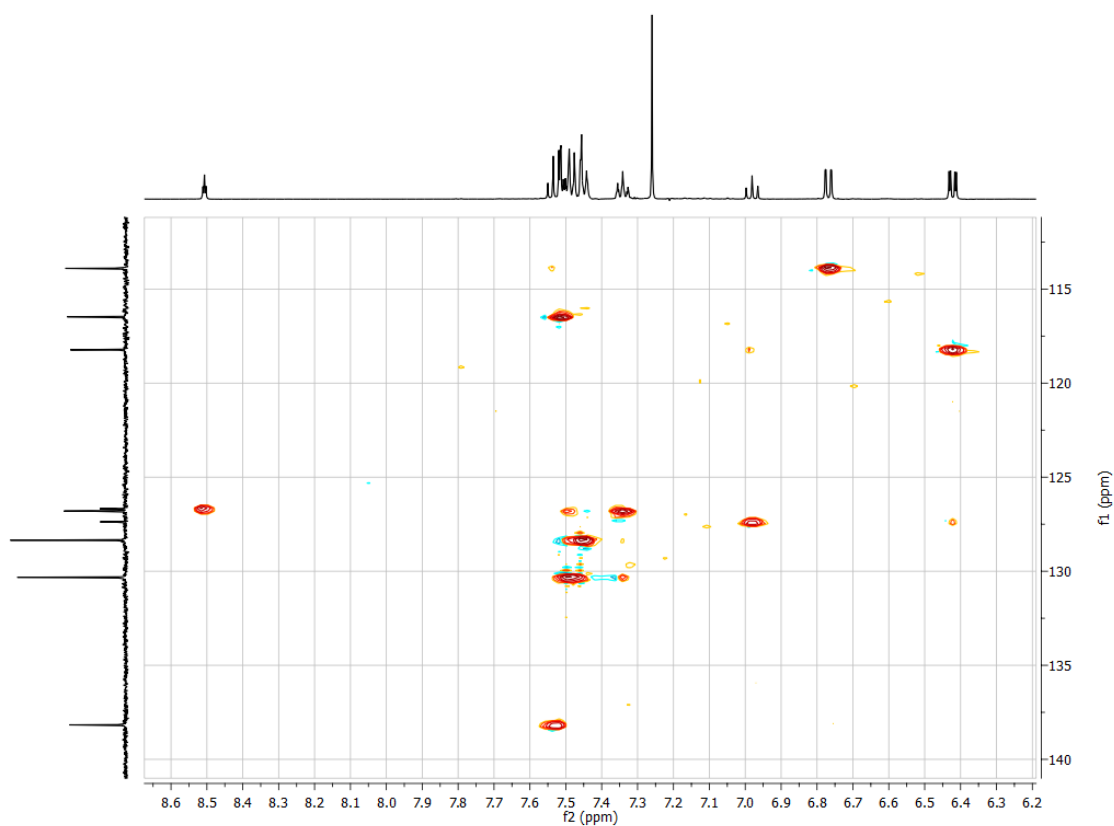

Figure S27. HSQC NMR spectrum of **1d** (CDCl<sub>3</sub>, 300K, 600, 151 MHz).

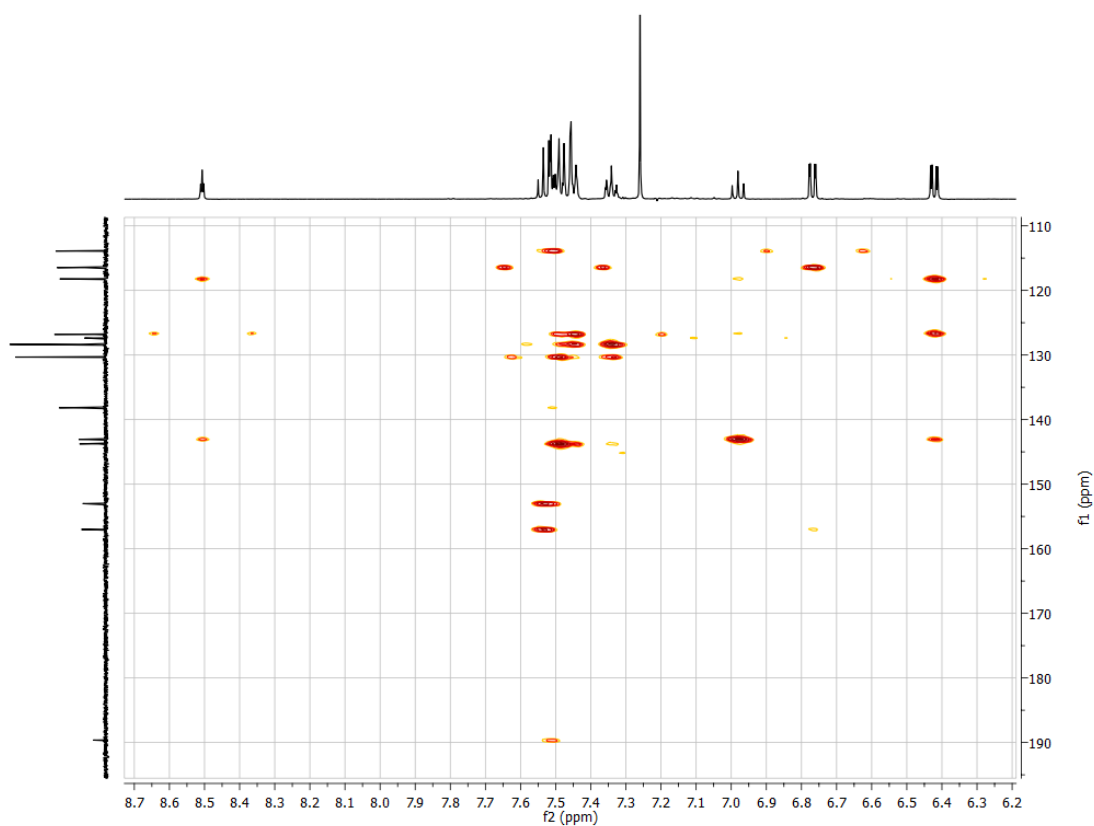

Figure S28. HMBC NMR spectrum of **1d** (CDCl<sub>3</sub>, 300K, 600, 151 MHz).

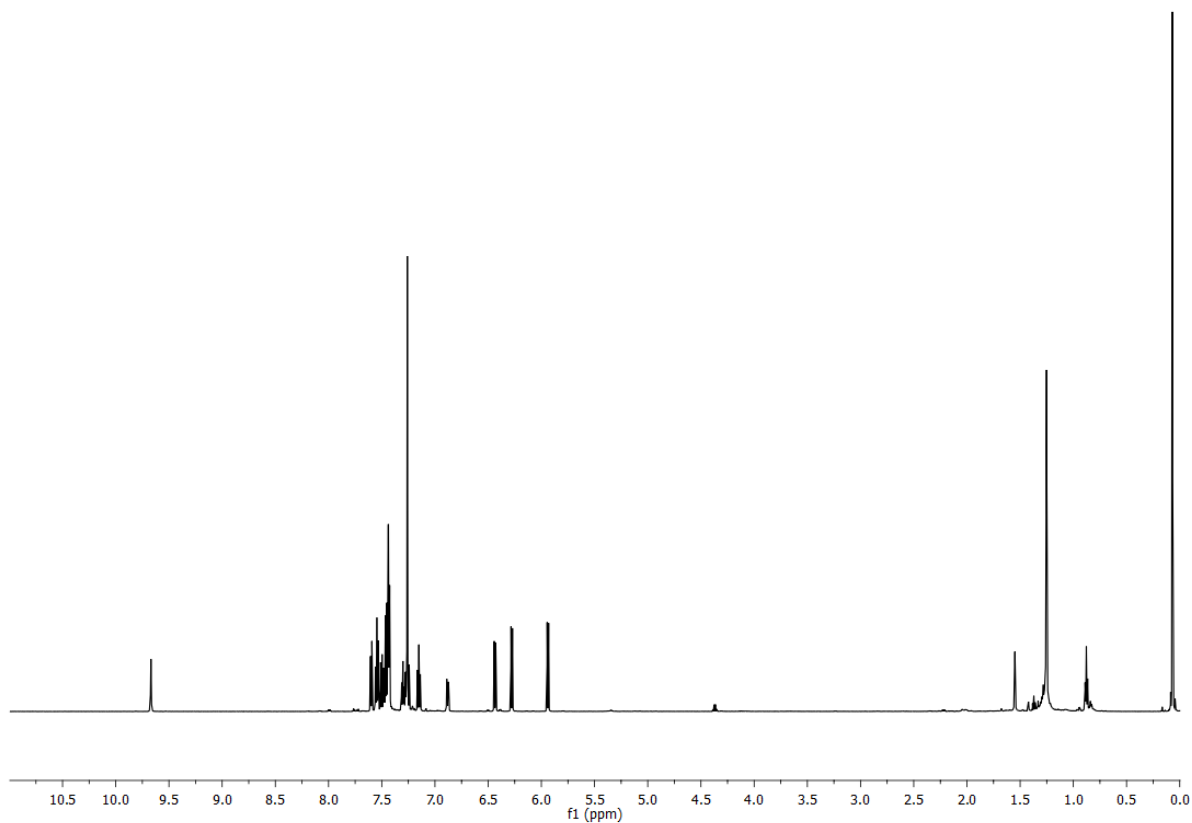

Figure S29.  $^1\text{H}$  NMR spectrum of **1e** ( $\text{CDCl}_3$ , 300K, 600 MHz).

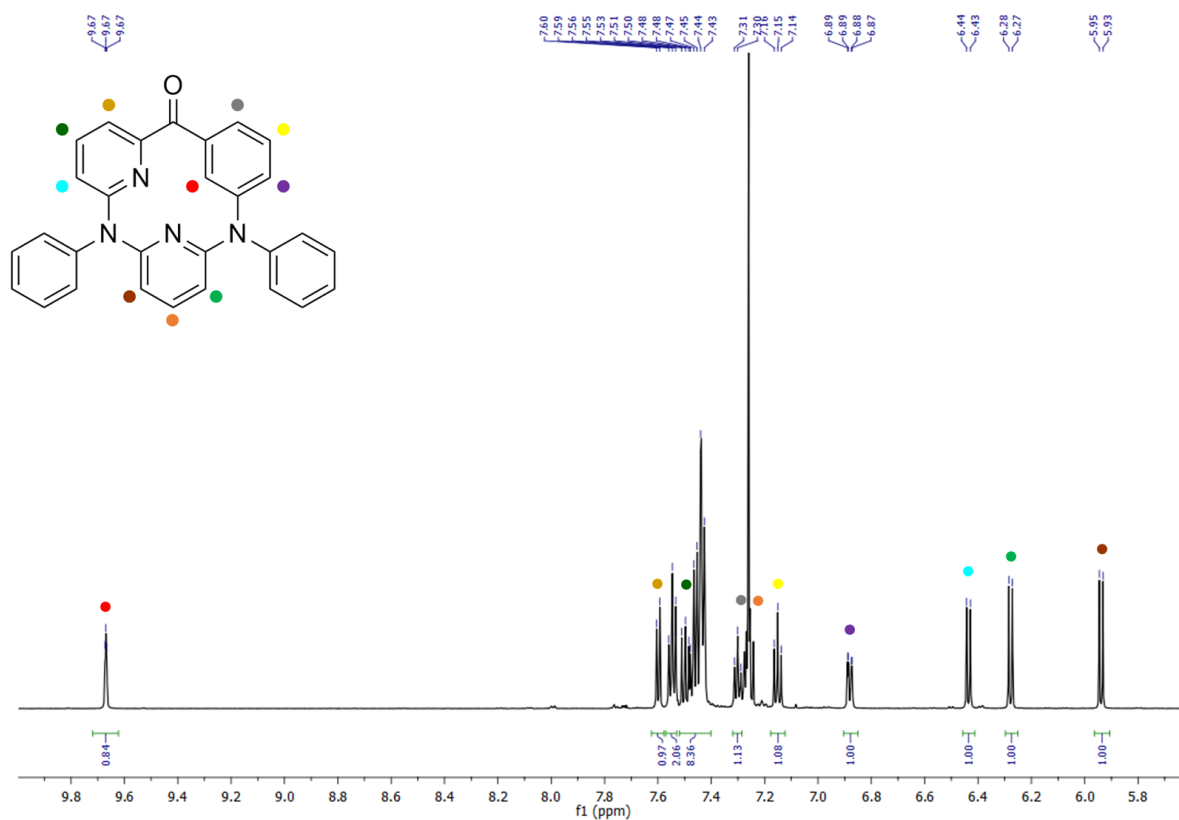

Figure S30.  $^1\text{H}$  NMR spectrum (zoom, aromatic region) of **1e** ( $\text{CDCl}_3$ , 300K, 600 MHz).

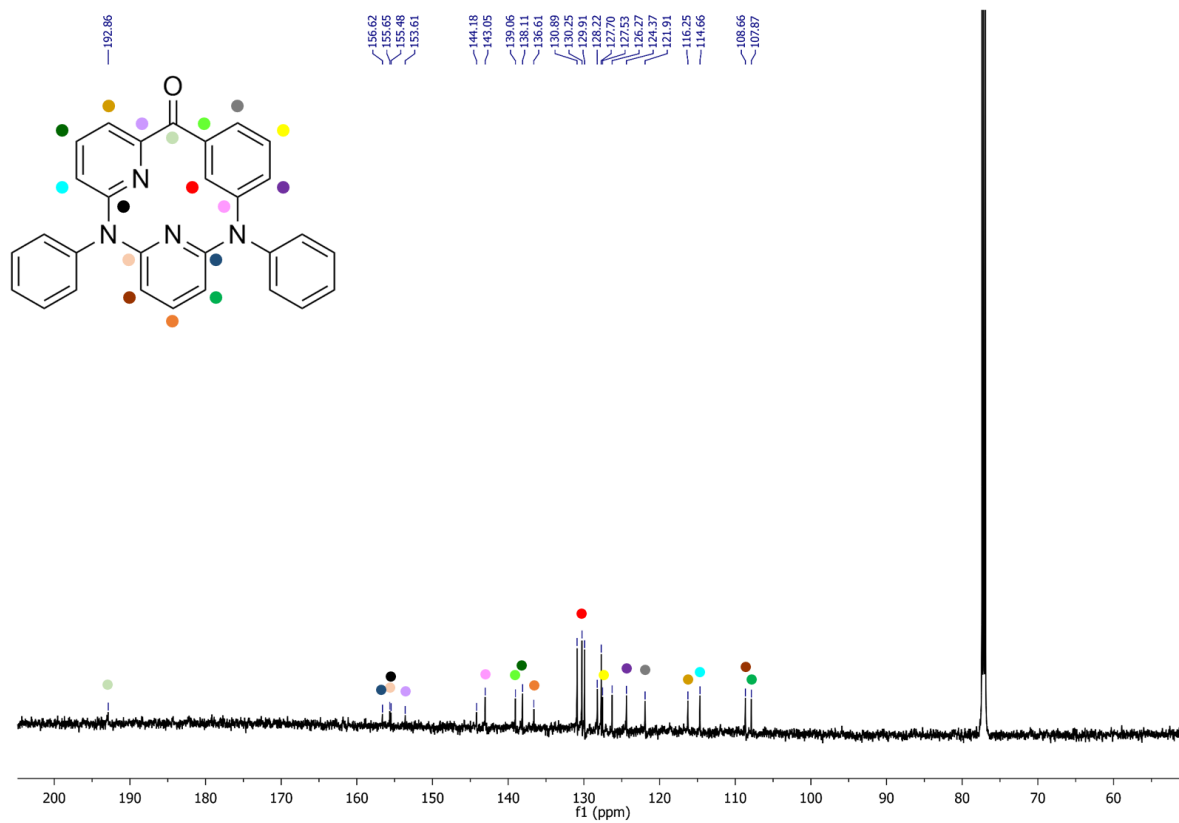

Figure S31.  $^{13}\text{C}$  NMR spectrum of **1e** ( $\text{CDCl}_3$ , 300K, 151 MHz).

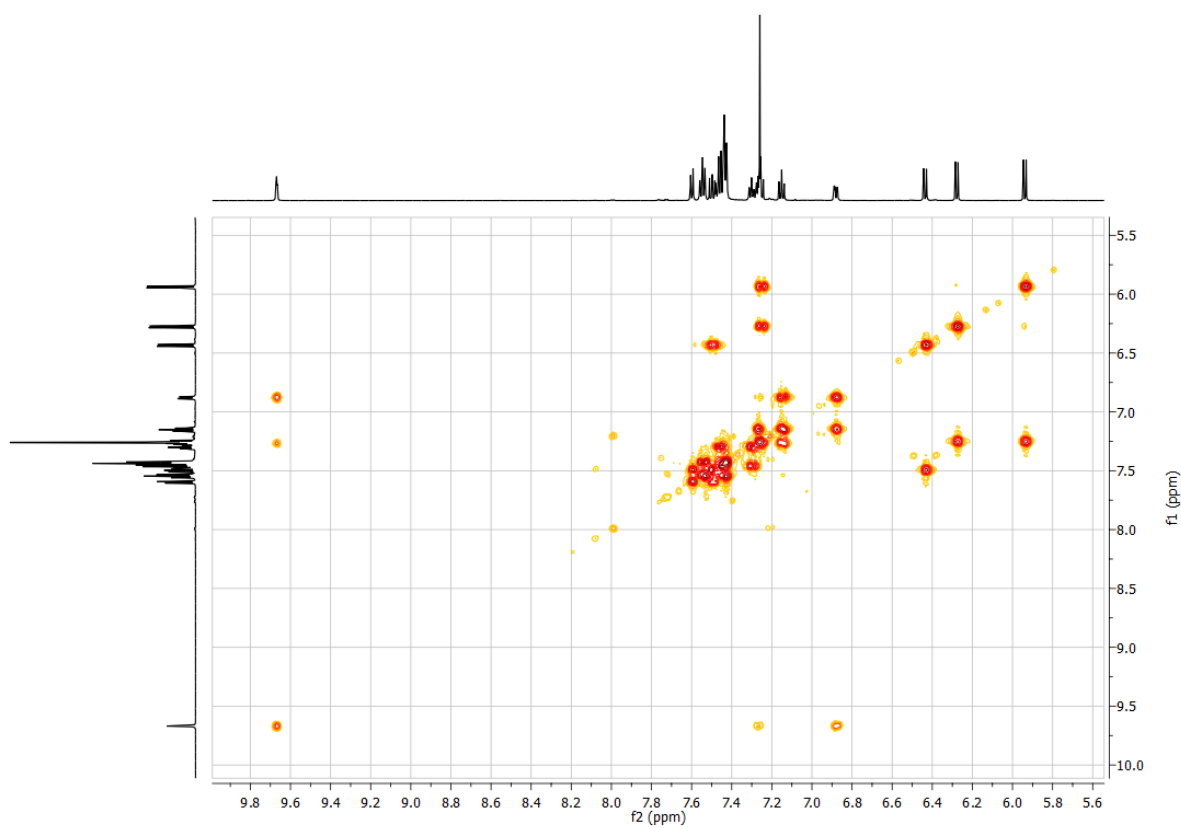

Figure S32. COSY NMR spectrum of **1e** ( $\text{CDCl}_3$ , 300K, 600 MHz).

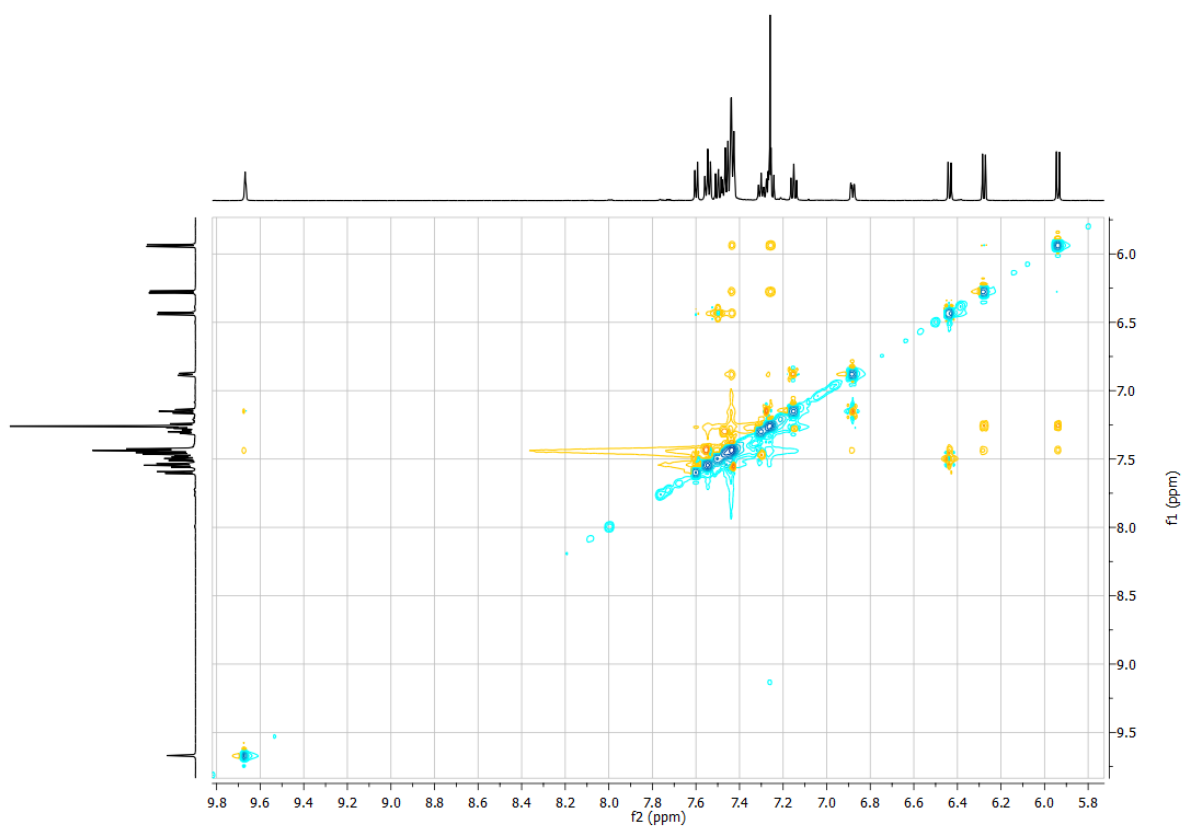

Figure S33. NOESY NMR spectrum of **1e** (CDCl<sub>3</sub>, 300K, 600 MHz).

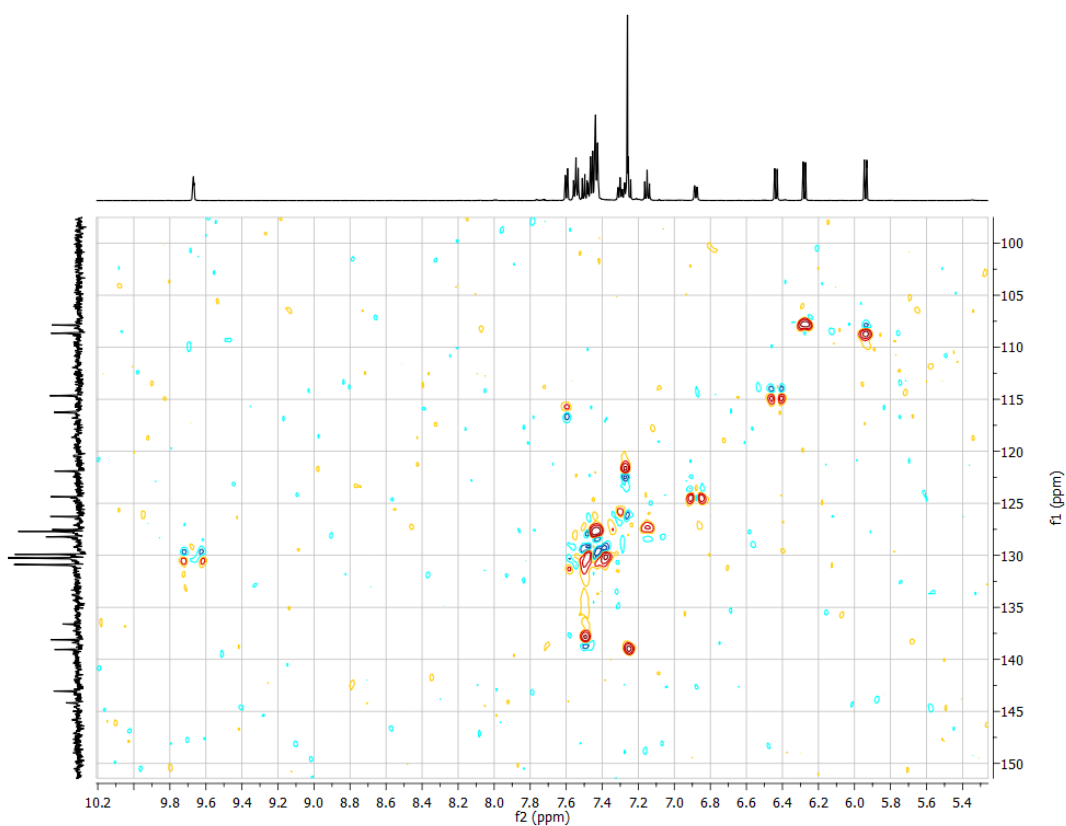

Figure S34. HSQC NMR spectrum of **1e** (CDCl<sub>3</sub>, 300K, 600, 151 MHz).

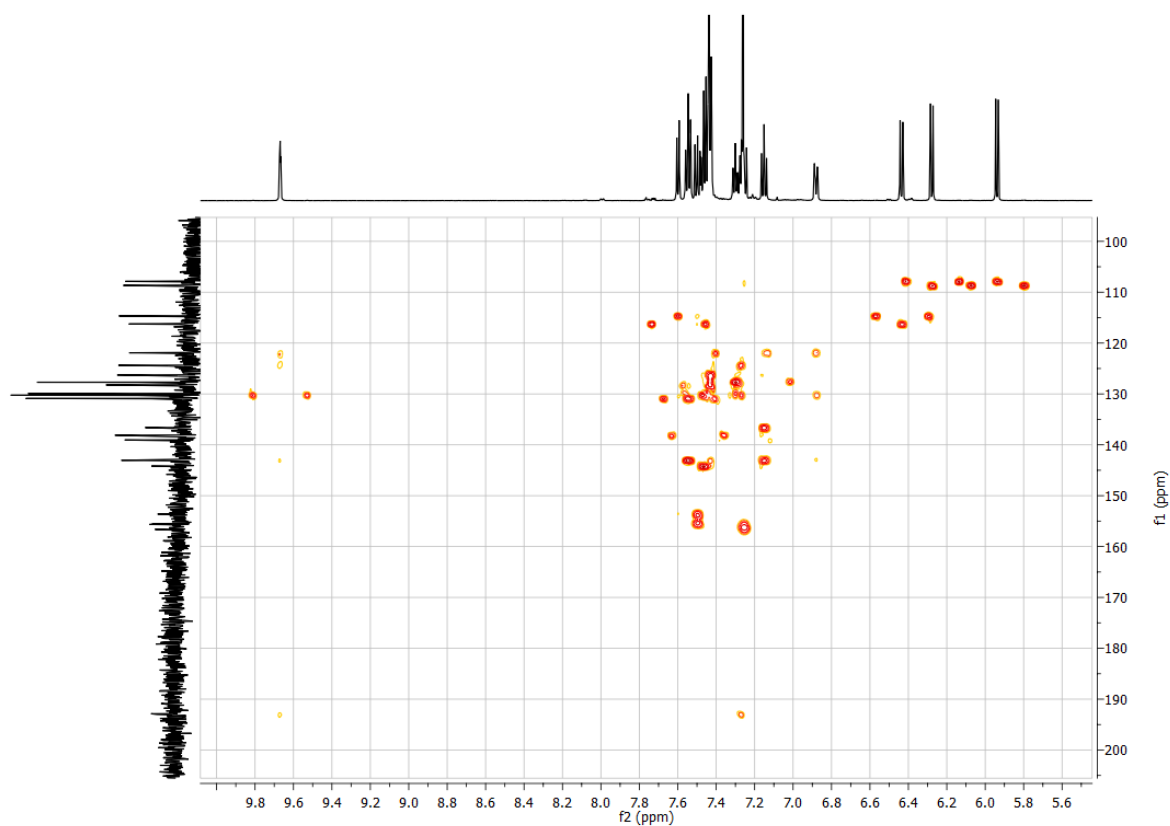

Figure S35. HMBC NMR spectrum of **1e** (CDCl<sub>3</sub>, 300K, 600, 151 MHz).

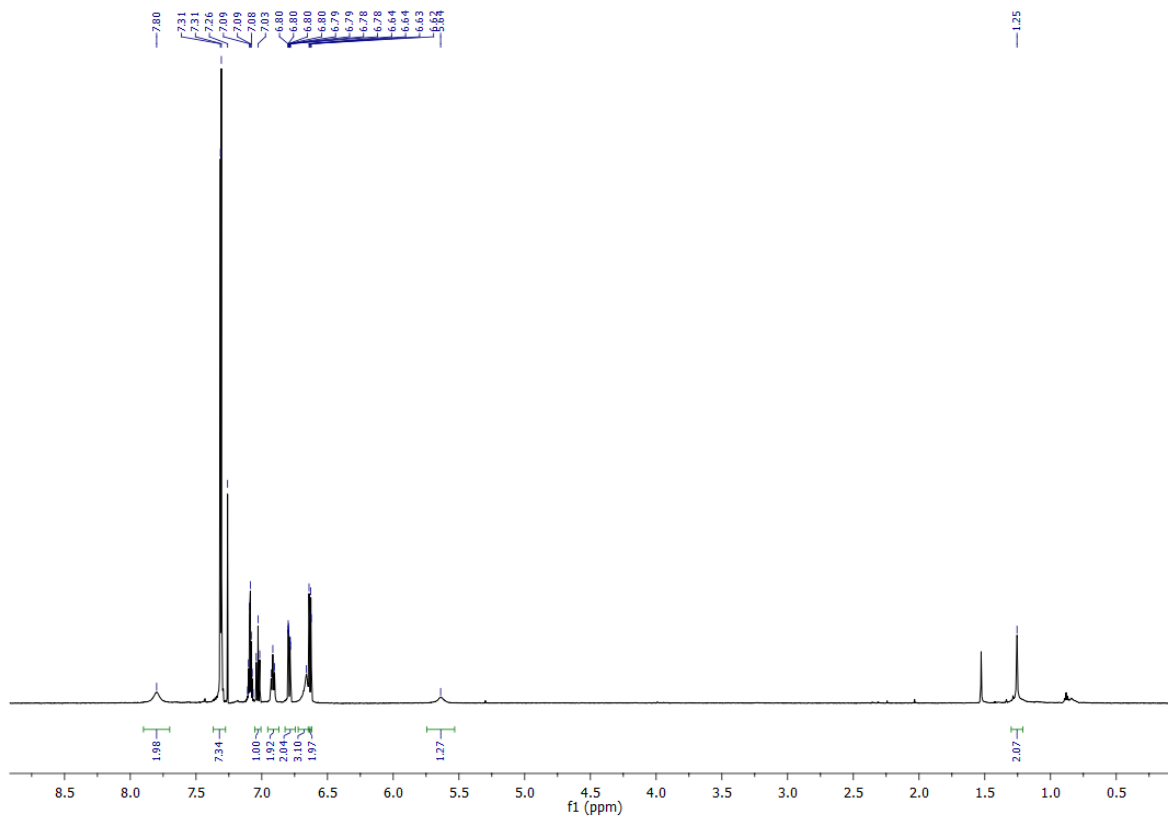

Figure S36. <sup>1</sup>H NMR spectrum of **2a** (CDCl<sub>3</sub>, 300K, 600 MHz).





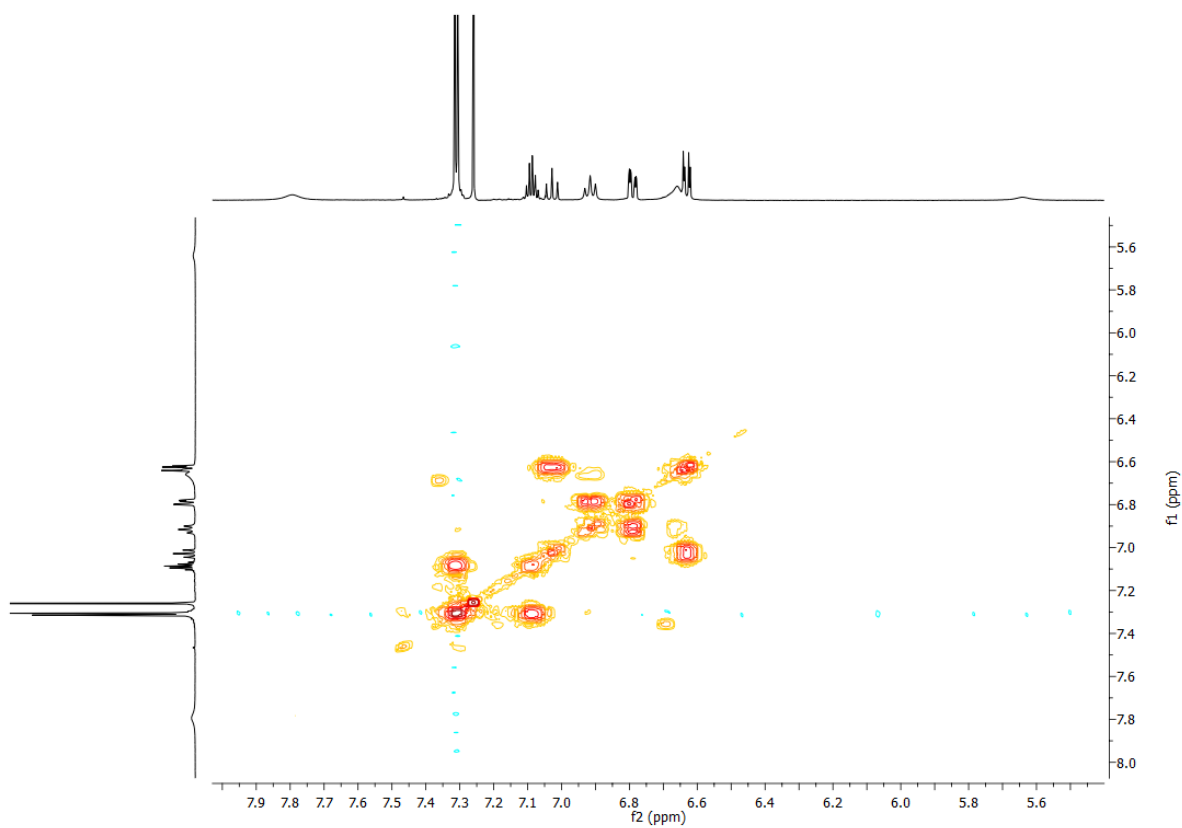

**Figure S39.** COSY NMR spectrum of **2a** (CDCl<sub>3</sub>, 300K, 600 MHz).

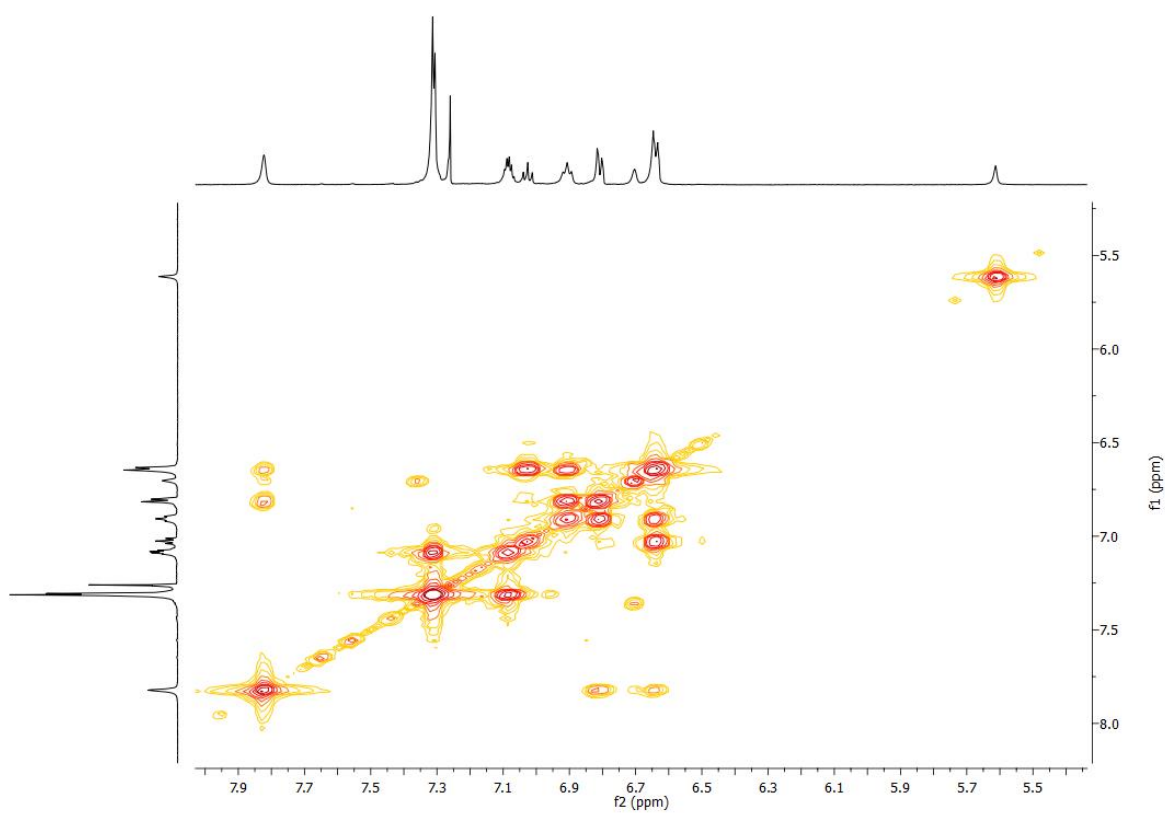

**Figure S40.** COSY NMR spectrum of **2a** (CDCl<sub>3</sub>, 270K, 600 MHz).

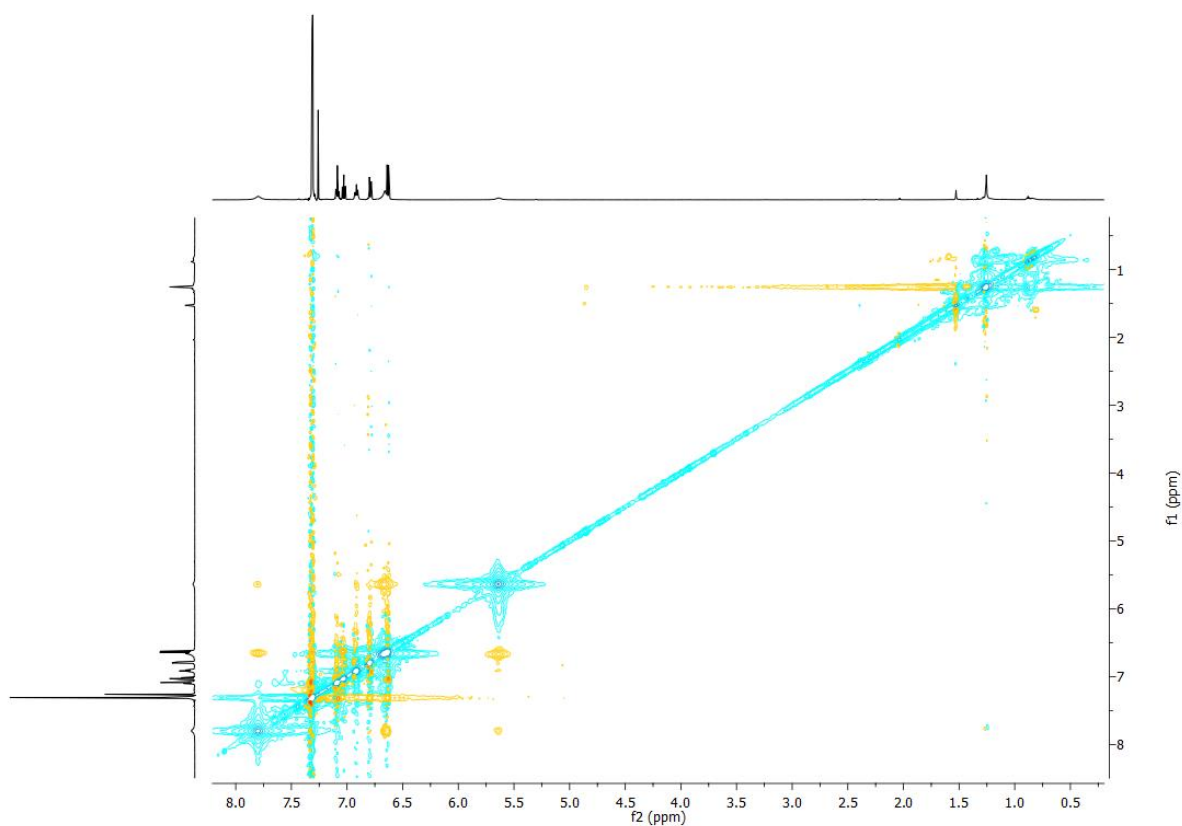

**Figure S41.** ROESY NMR spectrum of **2a** (CDCl<sub>3</sub>, 300K, 600 MHz).

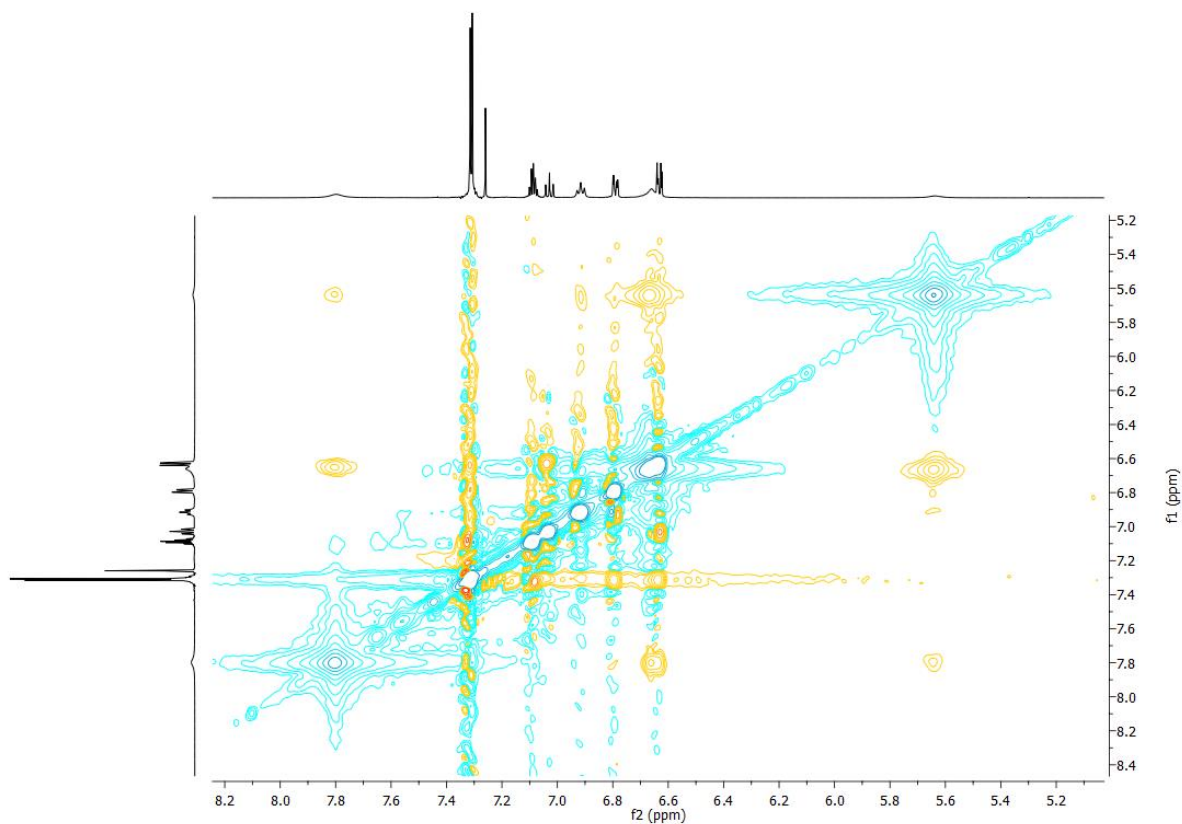

**Figure S42.** ROESY NMR (zoom, aromatic region) spectrum of **2a** (CDCl<sub>3</sub>, 300K, 600 MHz).

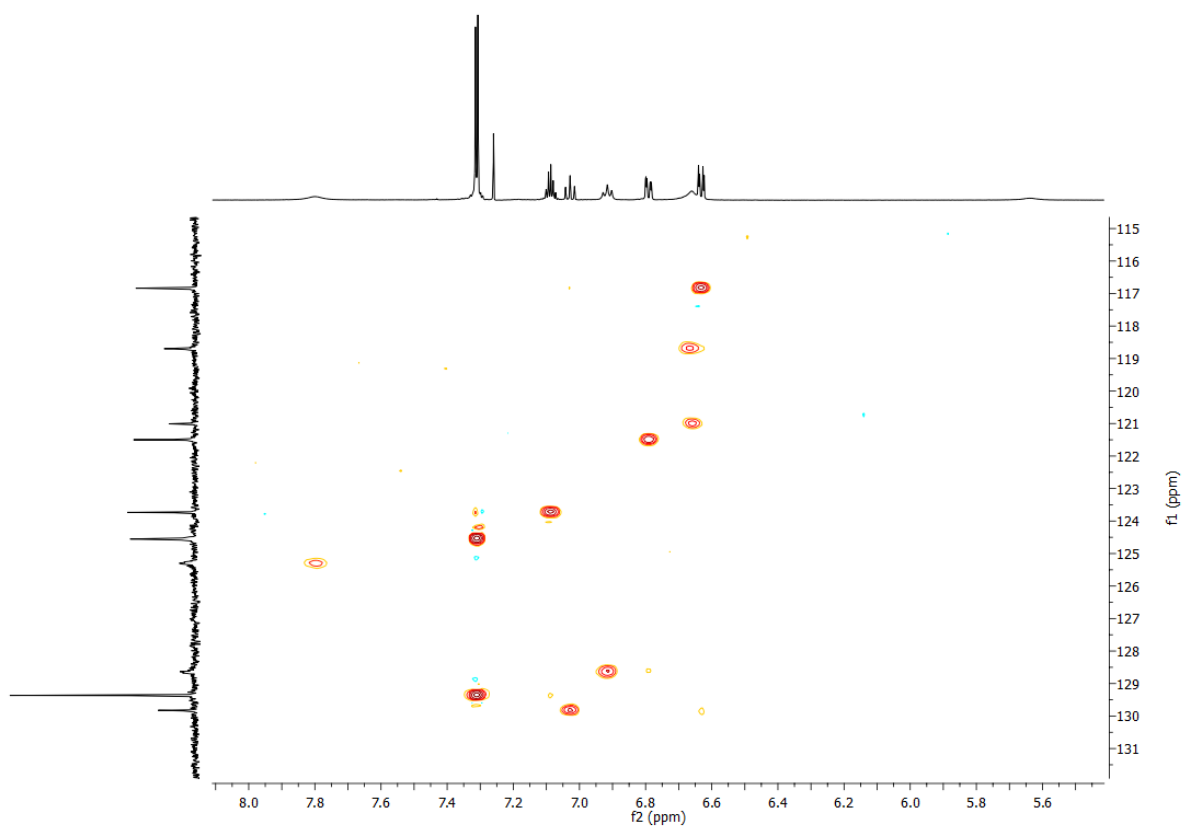

Figure S43. HSQC NMR spectrum of **2a** (CDCl<sub>3</sub>, 300K, 600, 151 MHz).

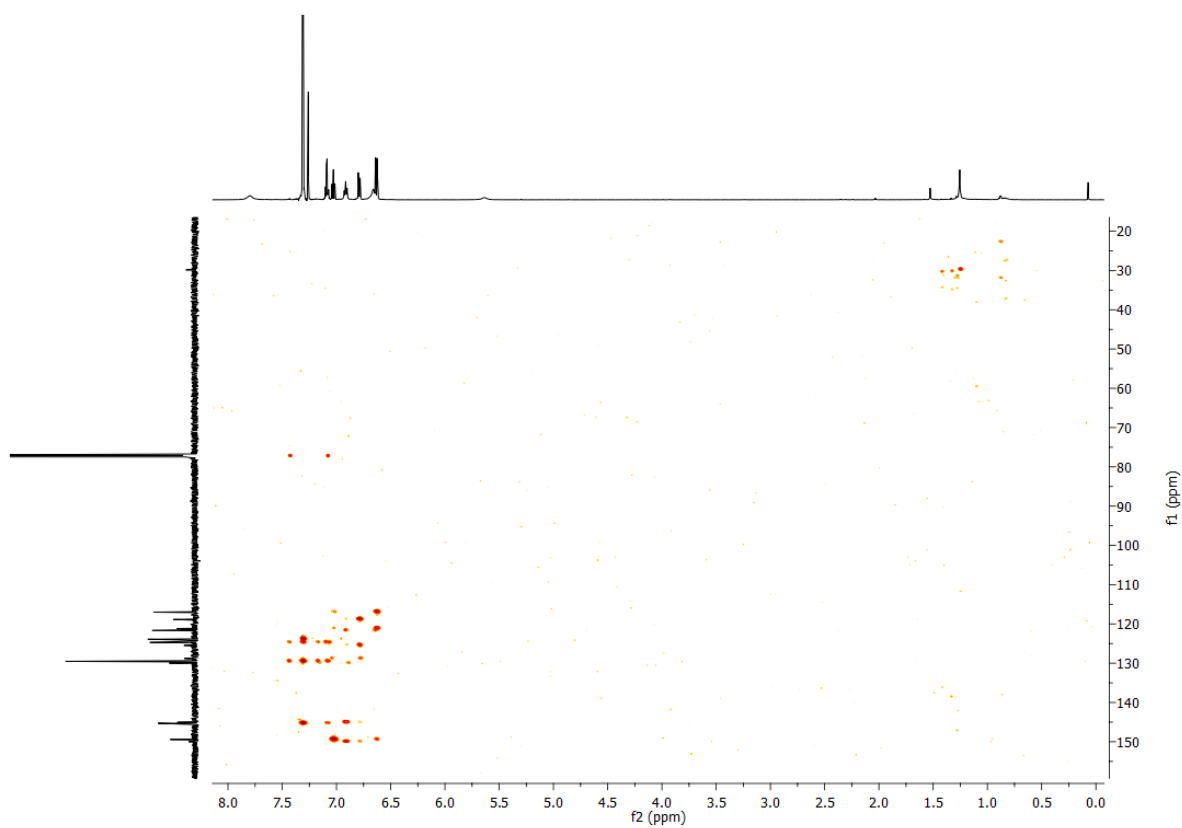

Figure S44. HMBC NMR spectrum of **2a** (CDCl<sub>3</sub>, 300K, 600, 151 MHz).

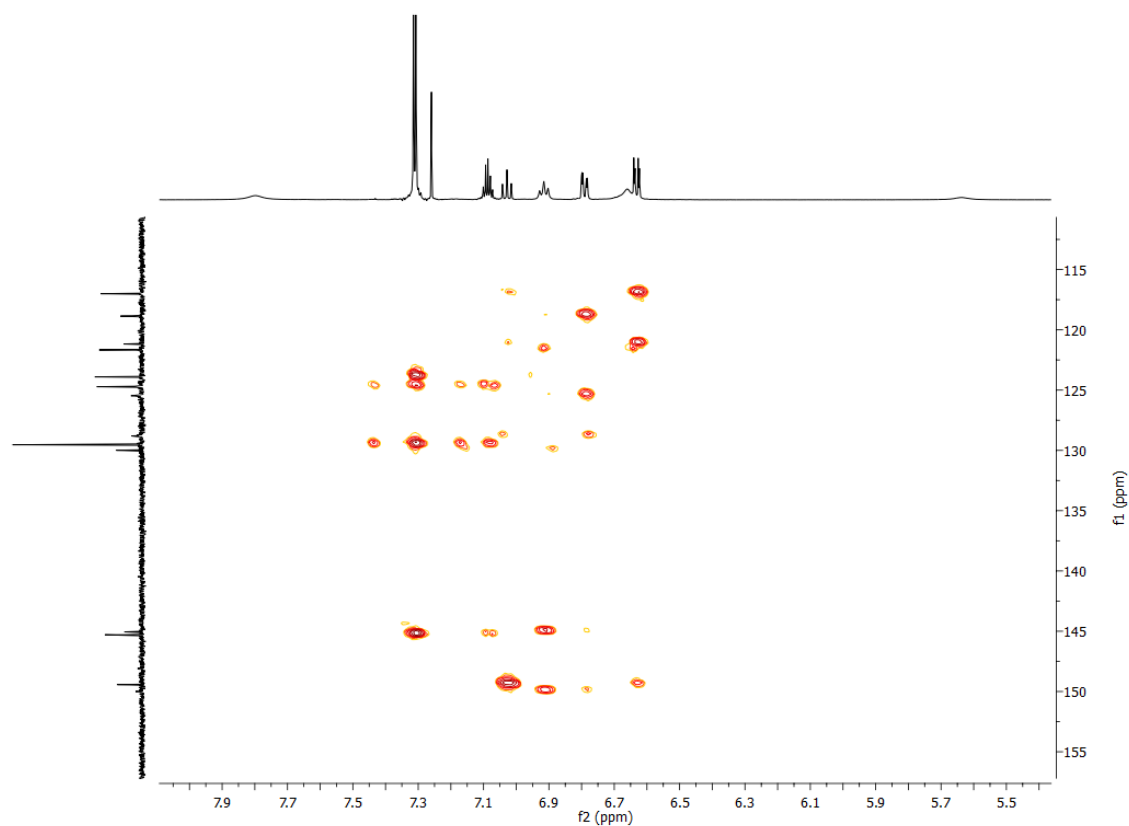

**Figure S45.** HMBC NMR spectrum (zoom, aromatic region) of **2a** (CDCl<sub>3</sub>, 300K, 600, 151 MHz).

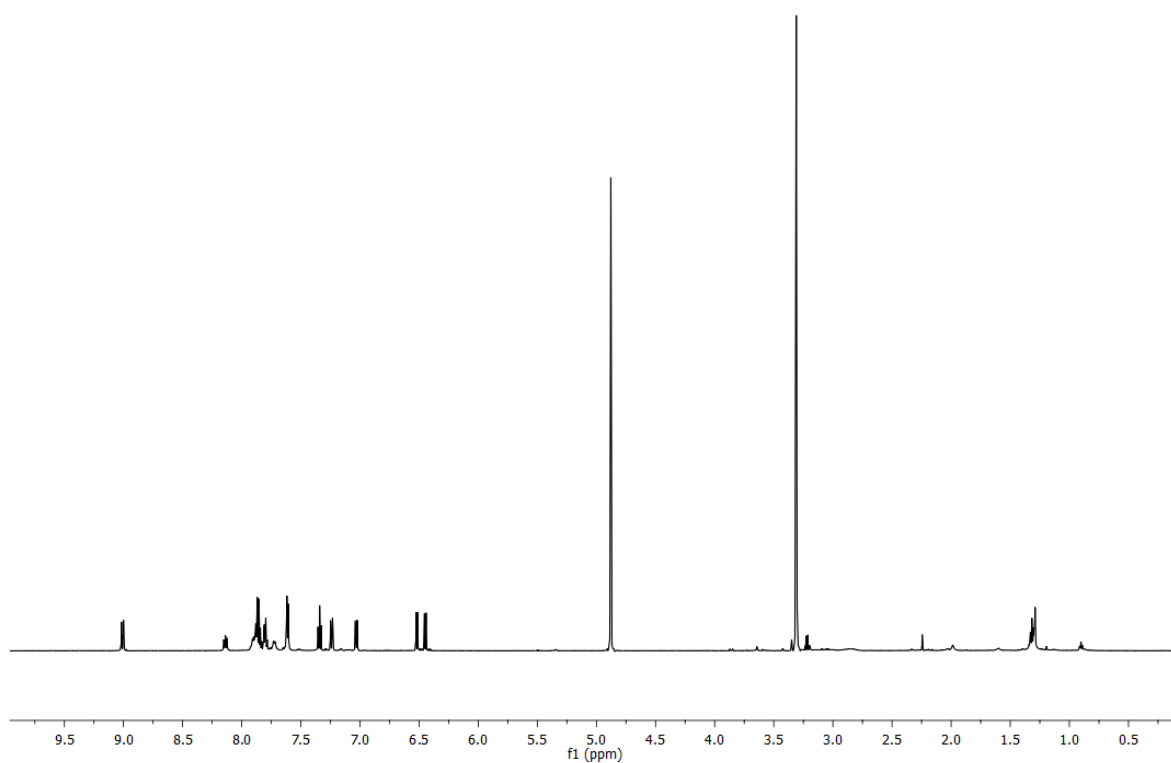

**Figure S46.** <sup>1</sup>H NMR spectrum of **3** (CD<sub>3</sub>OD, 300K, 600 MHz).

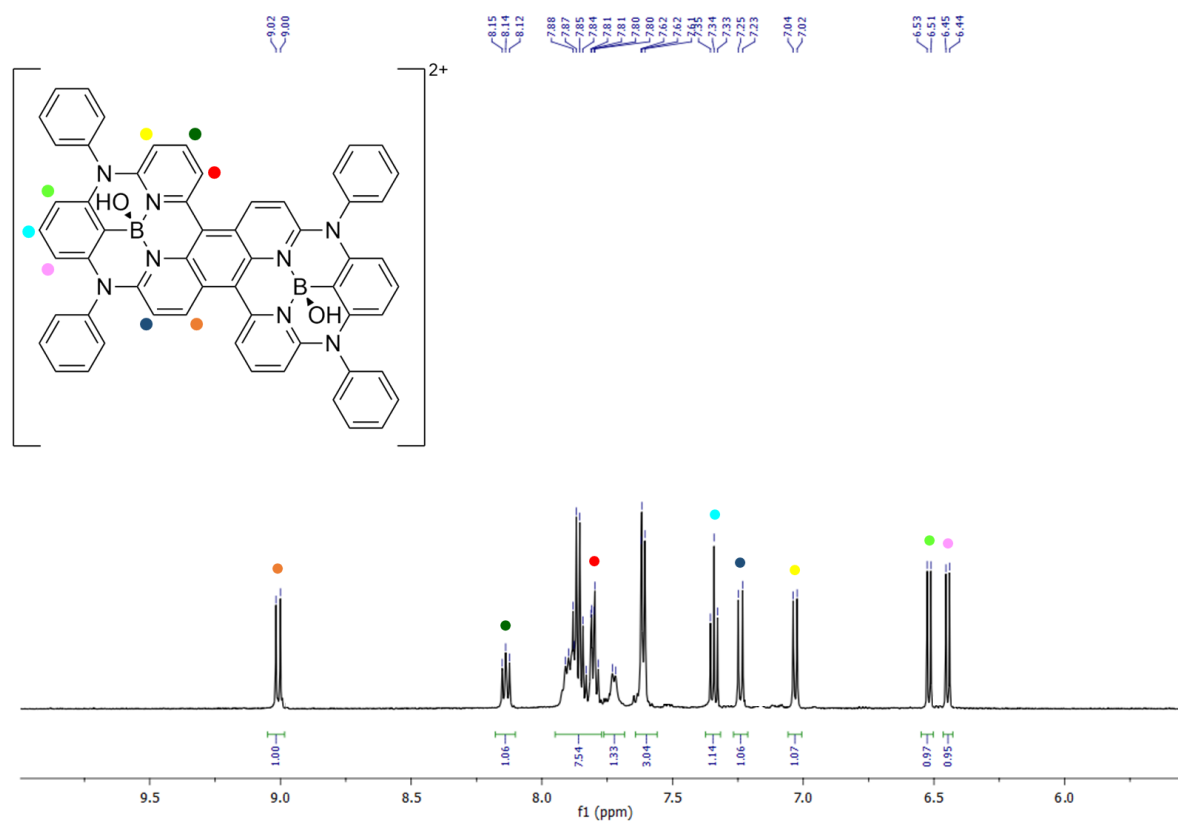

Figure S47.  $^1\text{H}$  NMR spectrum (zoom, aromatic region) of **3** ( $\text{CD}_3\text{OD}$ , 300K, 600 MHz).

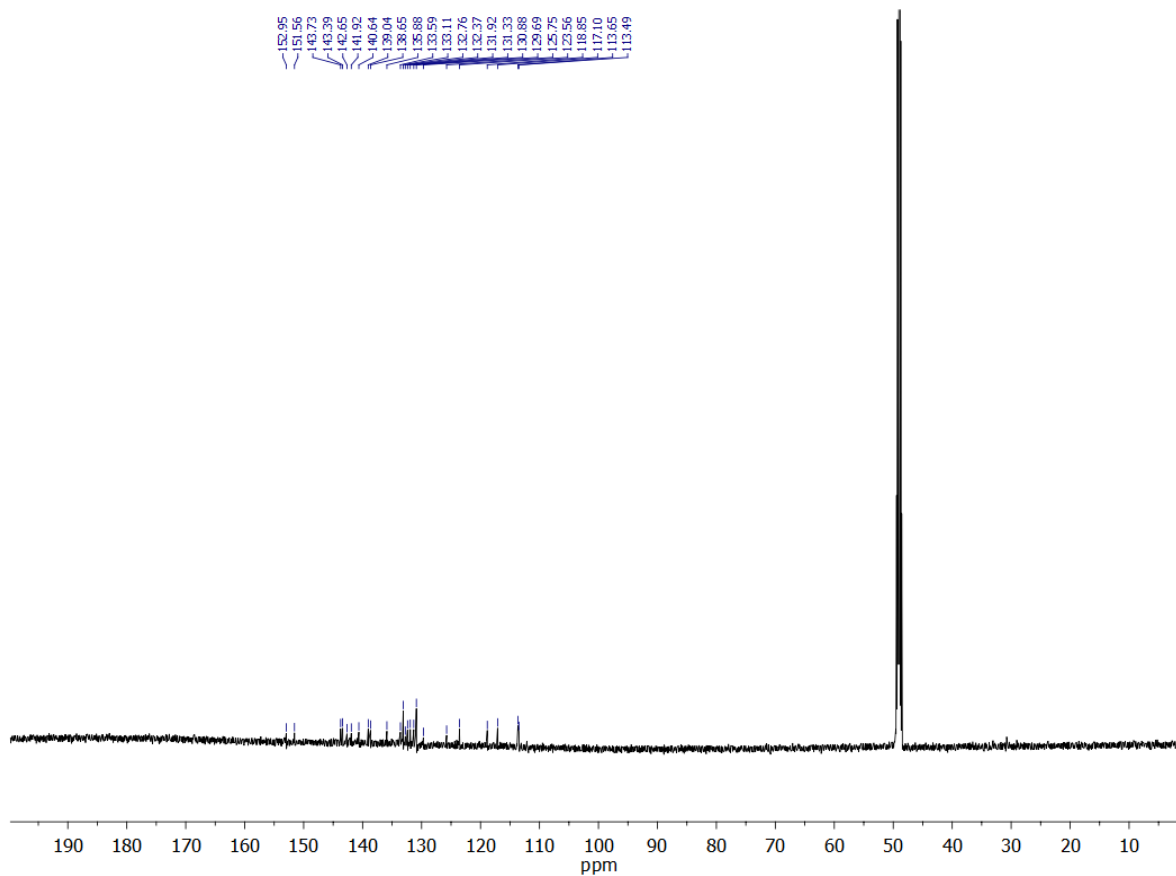

Figure S48.  $^{13}\text{C}$  NMR spectrum of **3** ( $\text{CD}_3\text{OD}$ , 300K, 151 MHz).

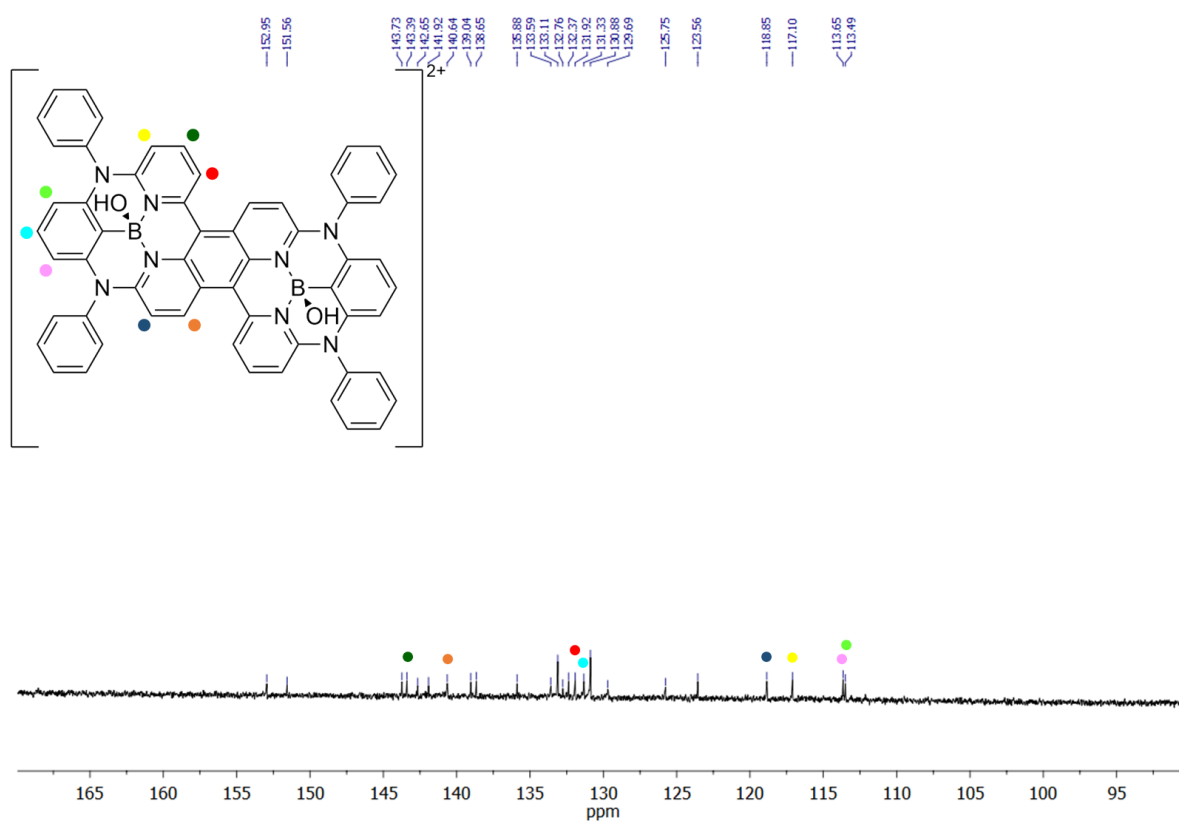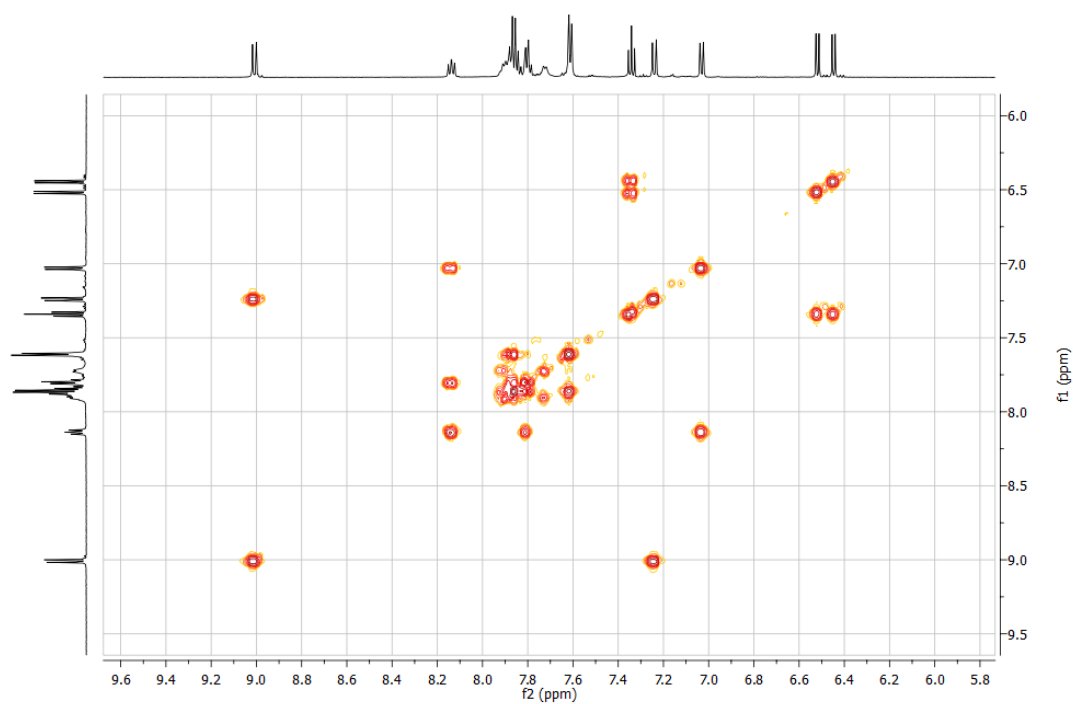

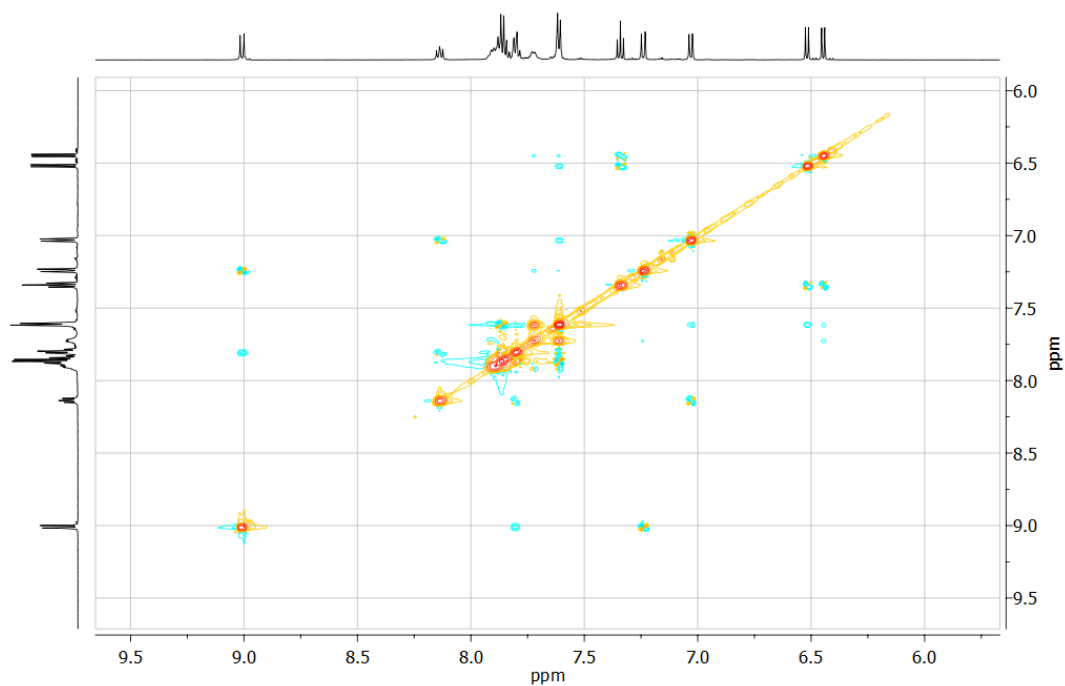

**Figure S51.** NOESY NMR spectrum of **3** (CD<sub>3</sub>OD, 300K, 600 MHz).

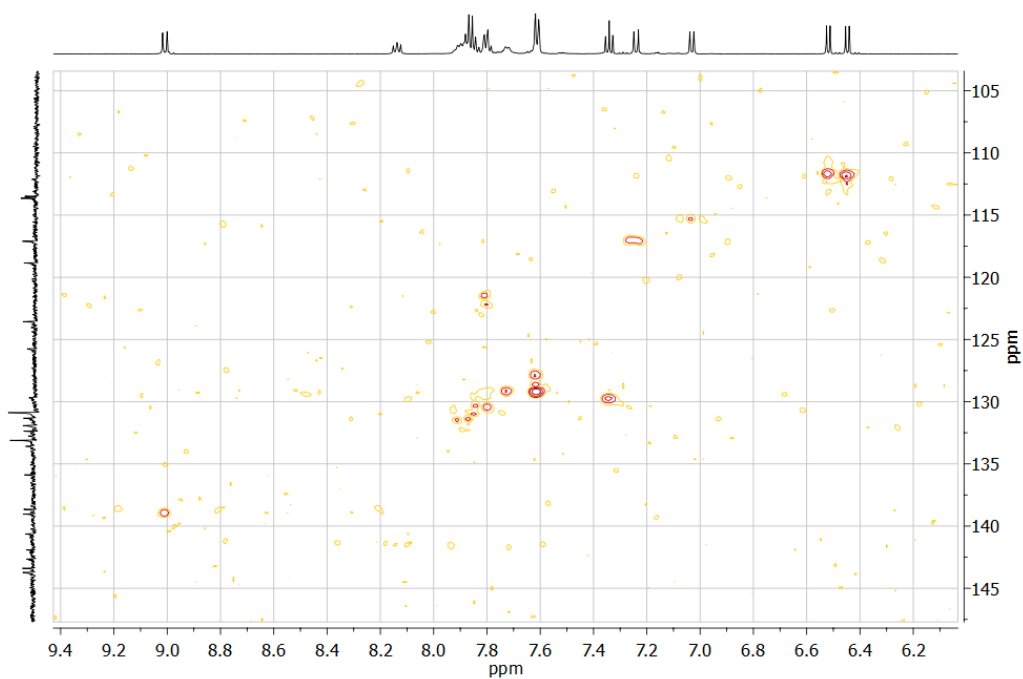

**Figure S52.** HSQC NMR spectrum of **3** (CD<sub>3</sub>OD, 300K, 600, 151 MHz).

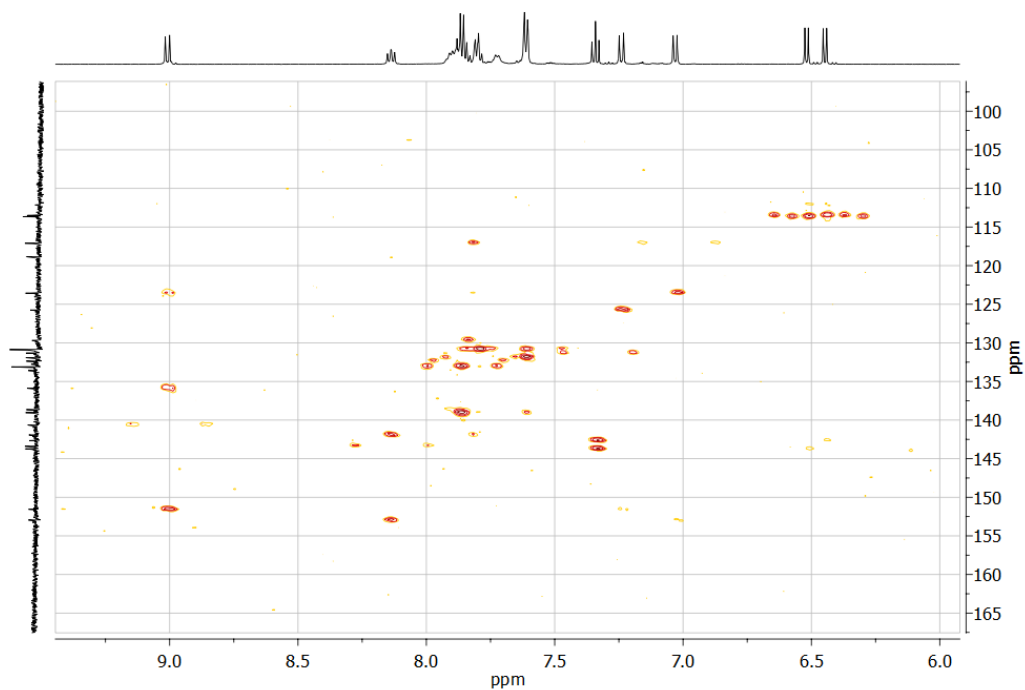

**Figure S53.** HMBC NMR spectrum of **3** (CD<sub>3</sub>OD, 300K, 600, 151 MHz).

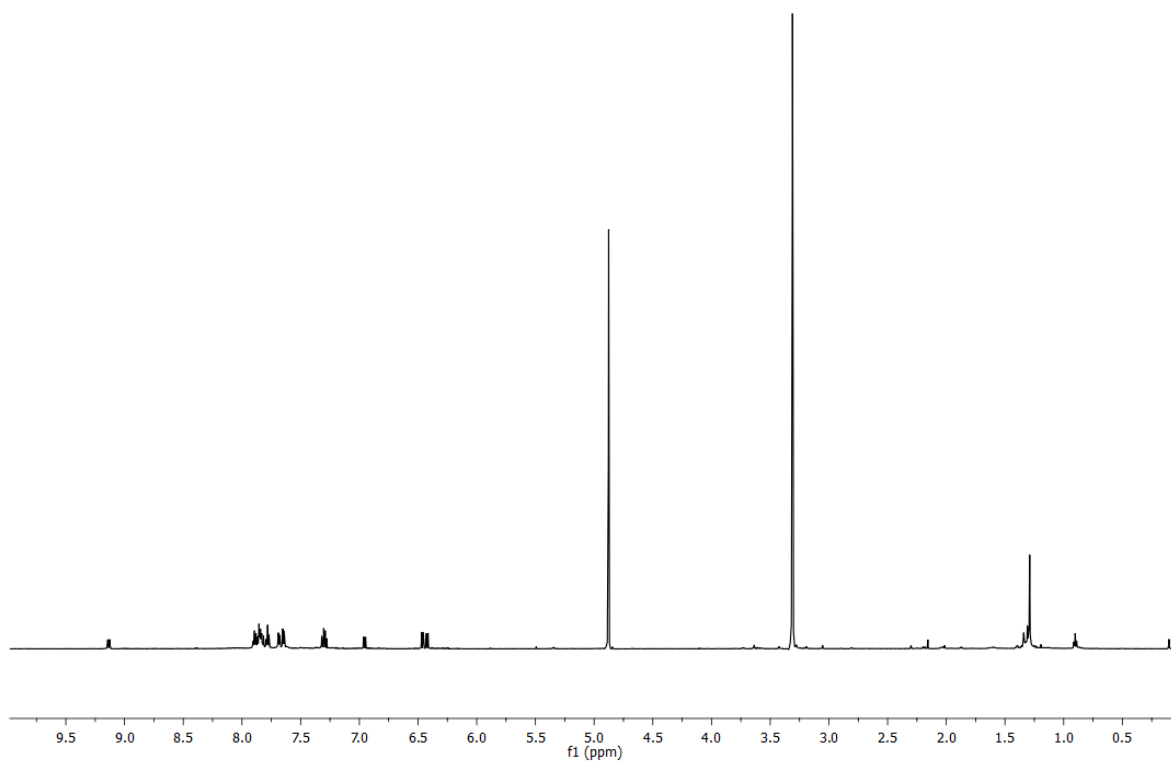

**Figure S54.** <sup>1</sup>H NMR spectrum of **4** (CD<sub>3</sub>OD, 300K, 600 MHz).



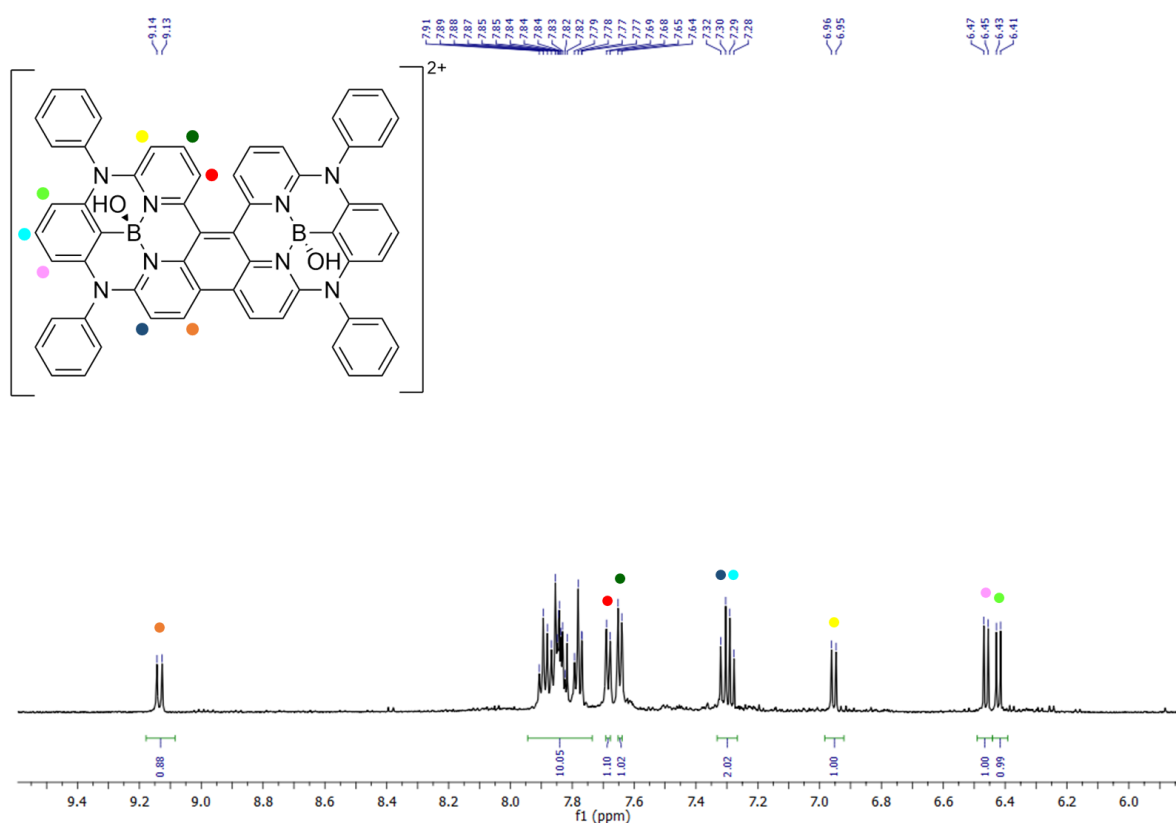

Figure S55.  $^1\text{H}$  NMR spectrum (zoom, aromatic region) of **4** (CD<sub>3</sub>OD, 300K, 600 MHz).

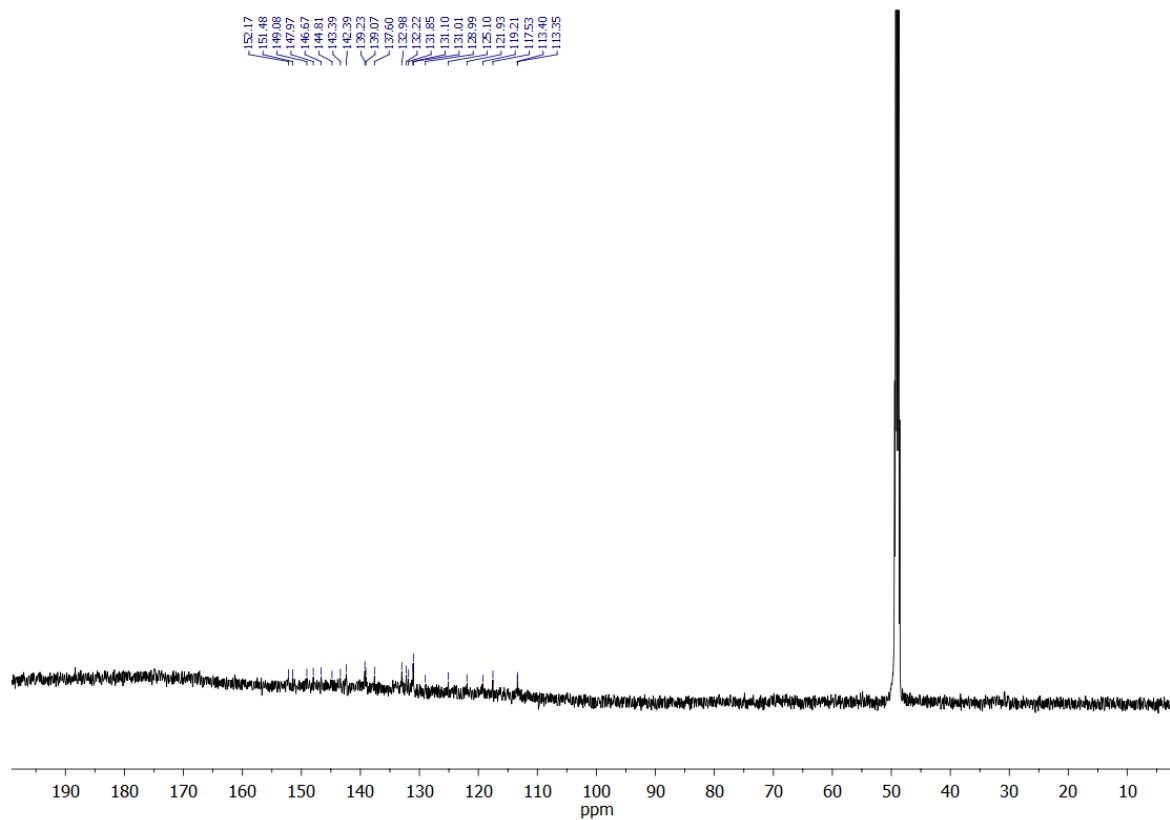

Figure S56.  $^{13}\text{C}$  NMR spectrum of **4** (CD<sub>3</sub>OD, 300K, 151 MHz).

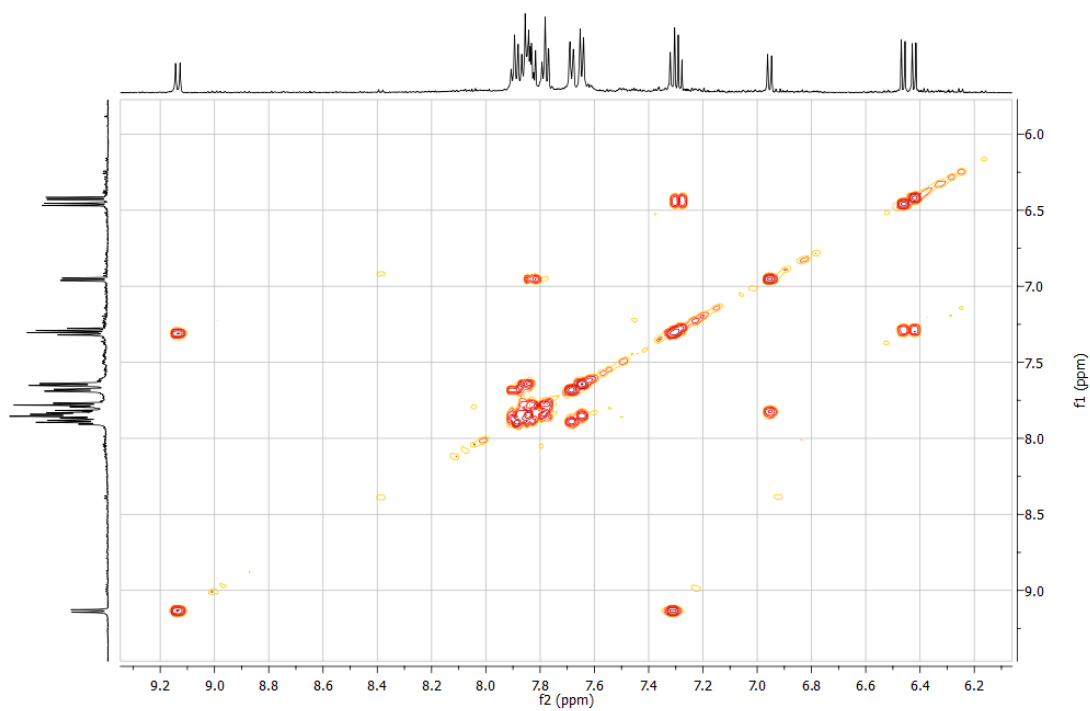

**Figure S57.** COSY NMR spectrum of **4** (CD<sub>3</sub>OD, 300K, 600 MHz).

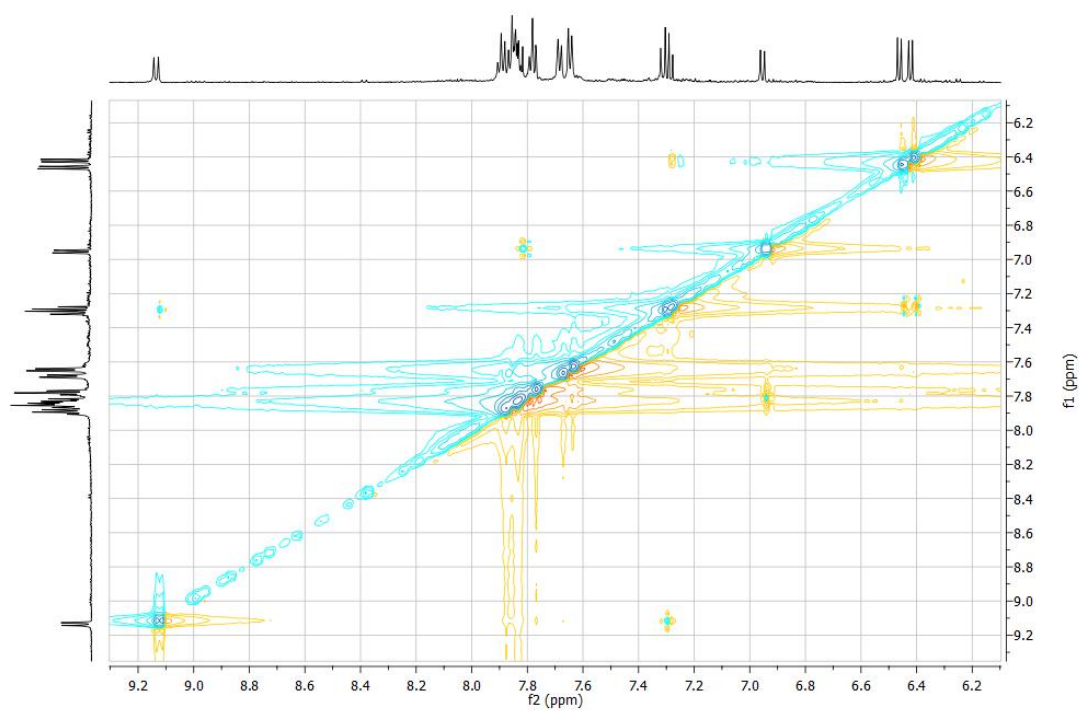

**Figure S58.** NOESY NMR spectrum of **4** (CD<sub>3</sub>OD, 300K, 600 MHz).

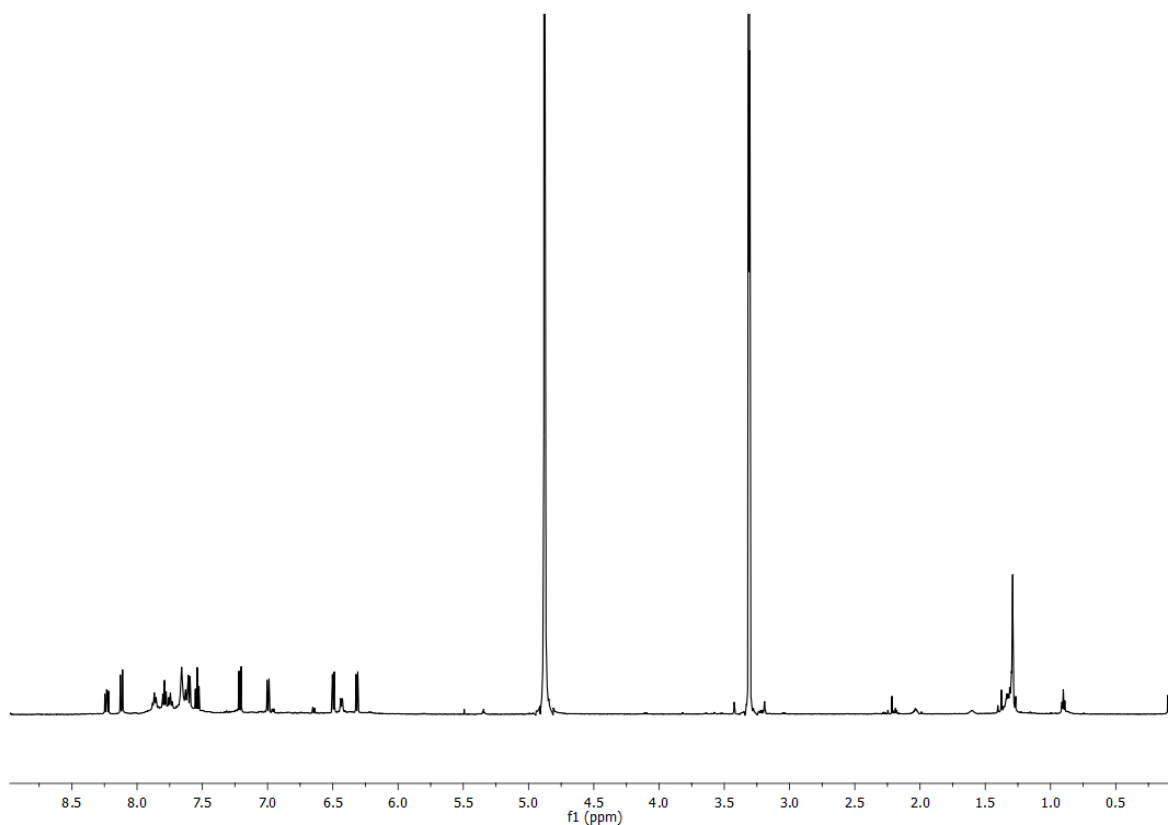

Figure S59  $^1\text{H}$  NMR spectrum of **3-O-3** ( $\text{CD}_3\text{OD}$ , 300K, 600 MHz).

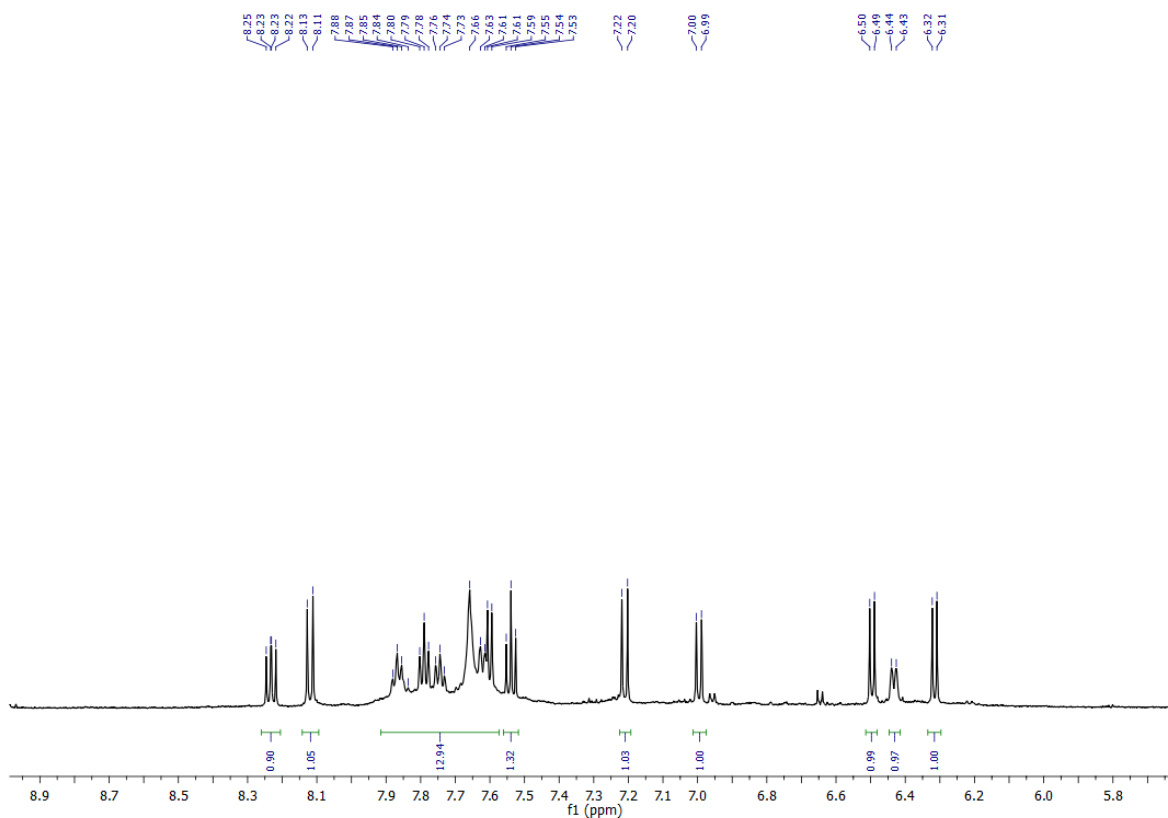

Figure S60.  $^1\text{H}$  NMR spectrum (zoom, aromatic region) of **3-O-3** ( $\text{CD}_3\text{OD}$ , 300K, 600 MHz).

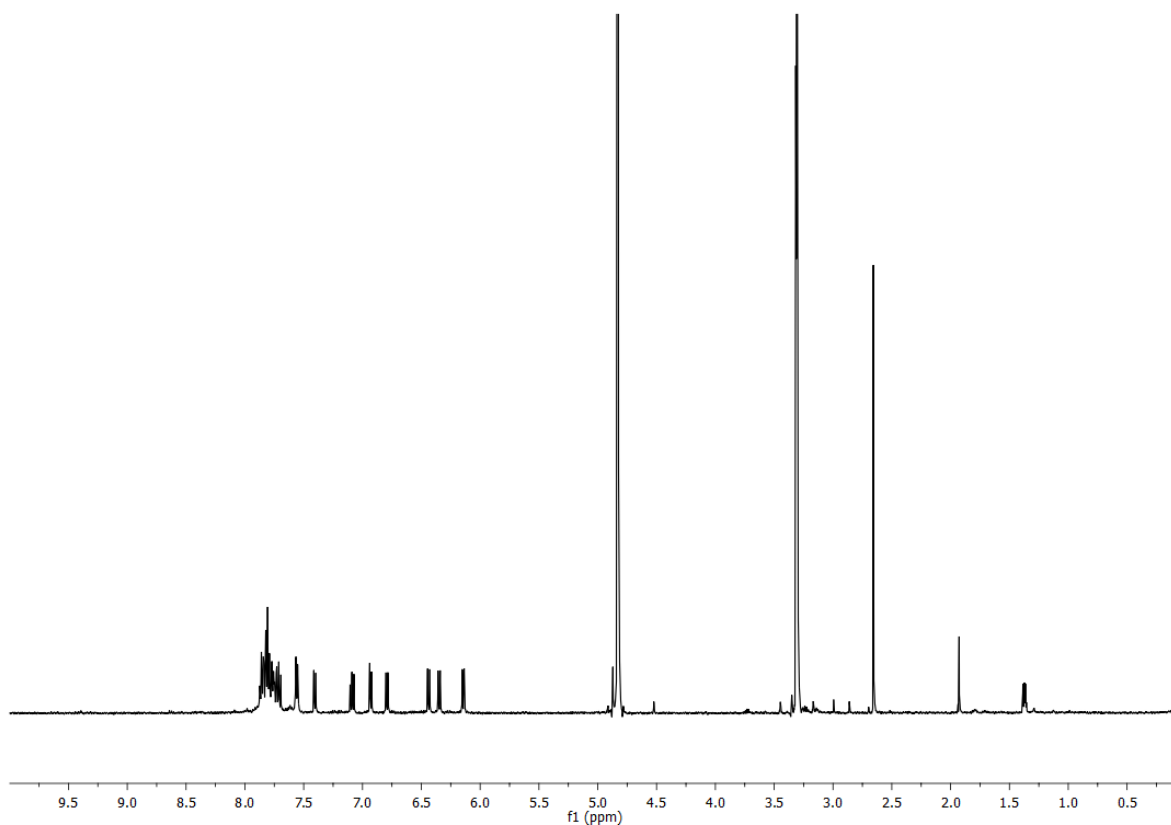

Figure S61.  $^1\text{H}$  NMR spectrum of **5** ( $\text{CD}_3\text{OD}$ , 300K, 500 MHz).

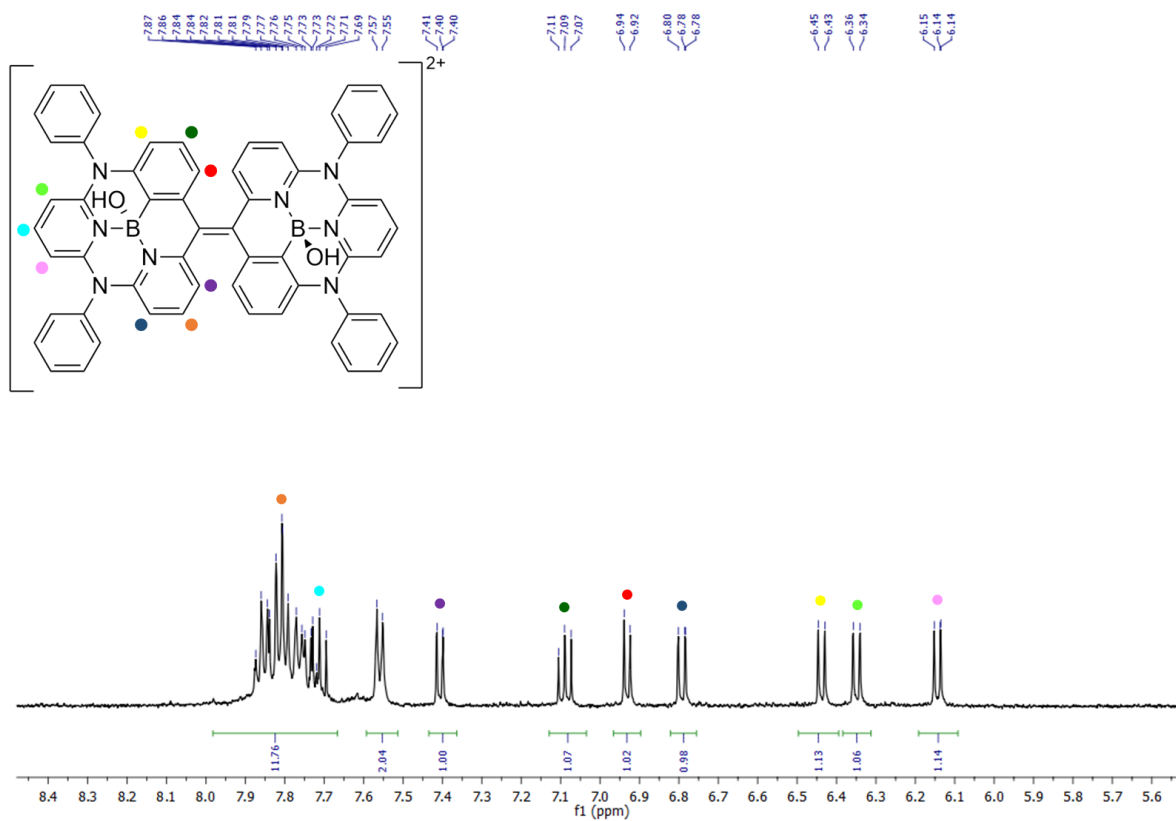

Figure S62  $^1\text{H}$  NMR spectrum (zoom, aromatic region) of **5** ( $\text{CD}_3\text{OD}$ , 300K, 500 MHz).

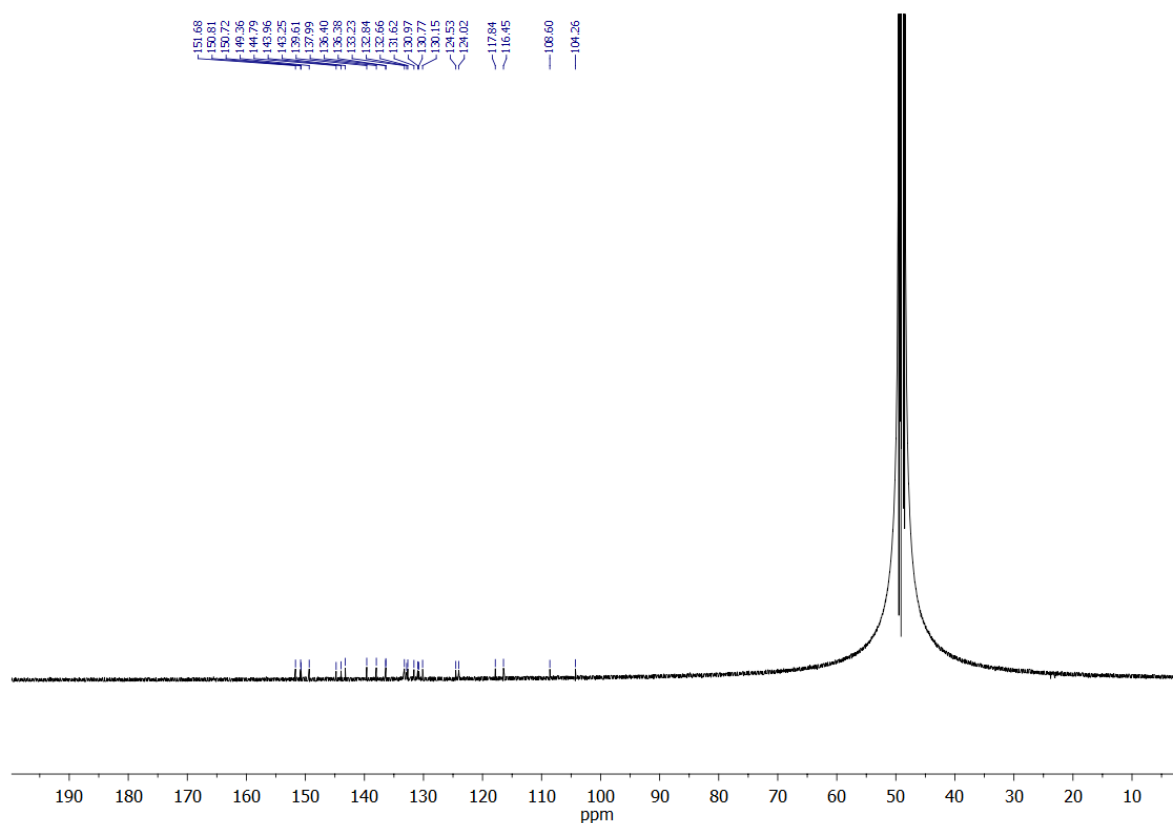

Figure S63.  $^{13}\text{C}$  NMR spectrum of **5** ( $\text{CD}_3\text{OD}$ , 300K, 126 MHz).

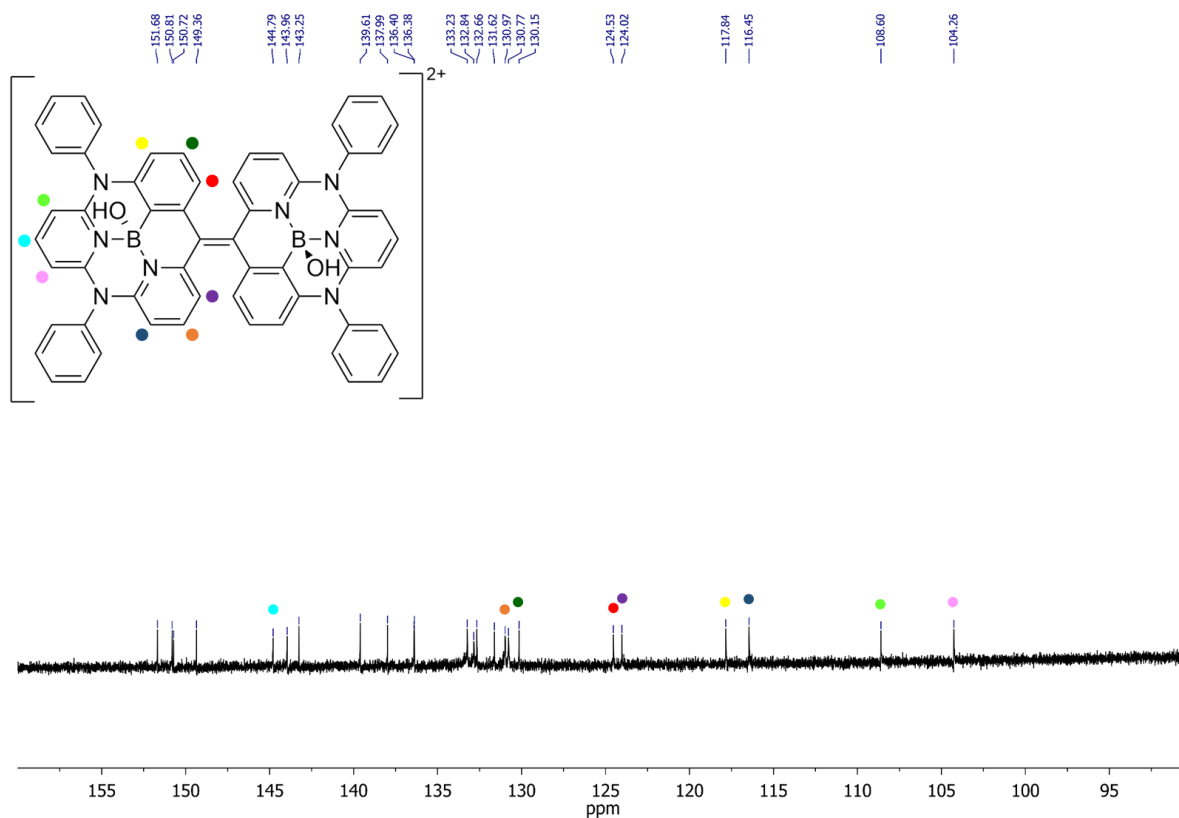

Figure S64.  $^{13}\text{C}$  NMR spectrum (zoom) of **5** ( $\text{CD}_3\text{OD}$ , 300K, 126 MHz).

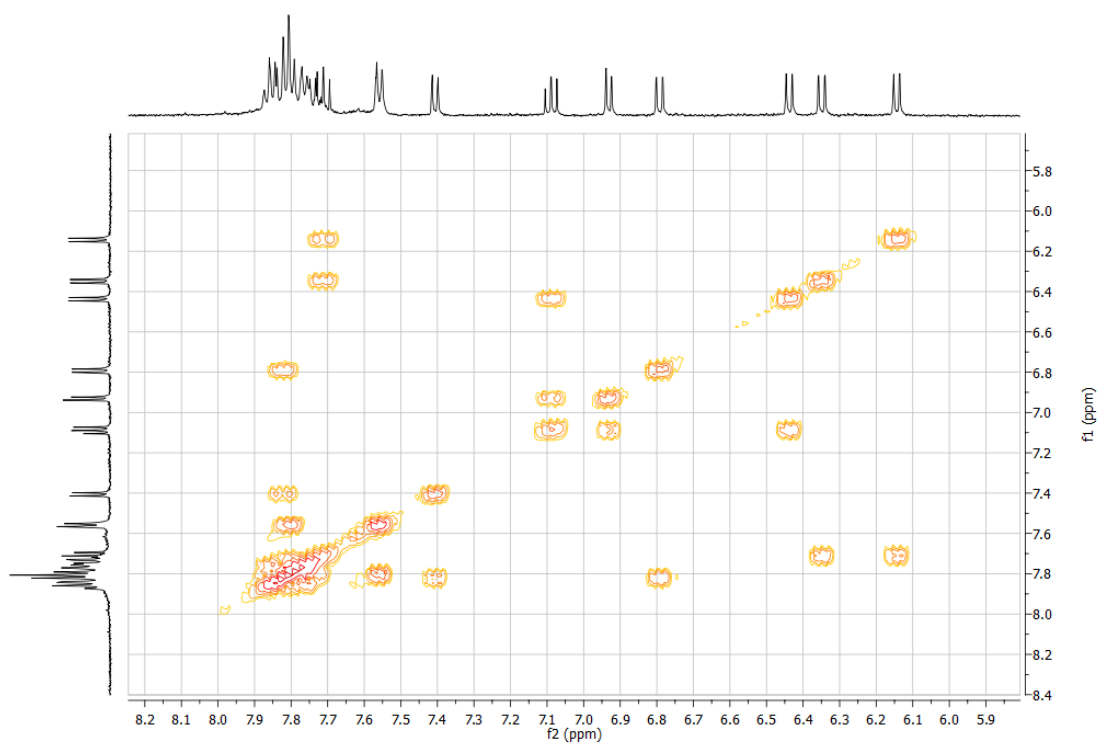

**Figure S65.** COSY NMR spectrum of **5** (CD<sub>3</sub>OD, 300K, 500 MHz).

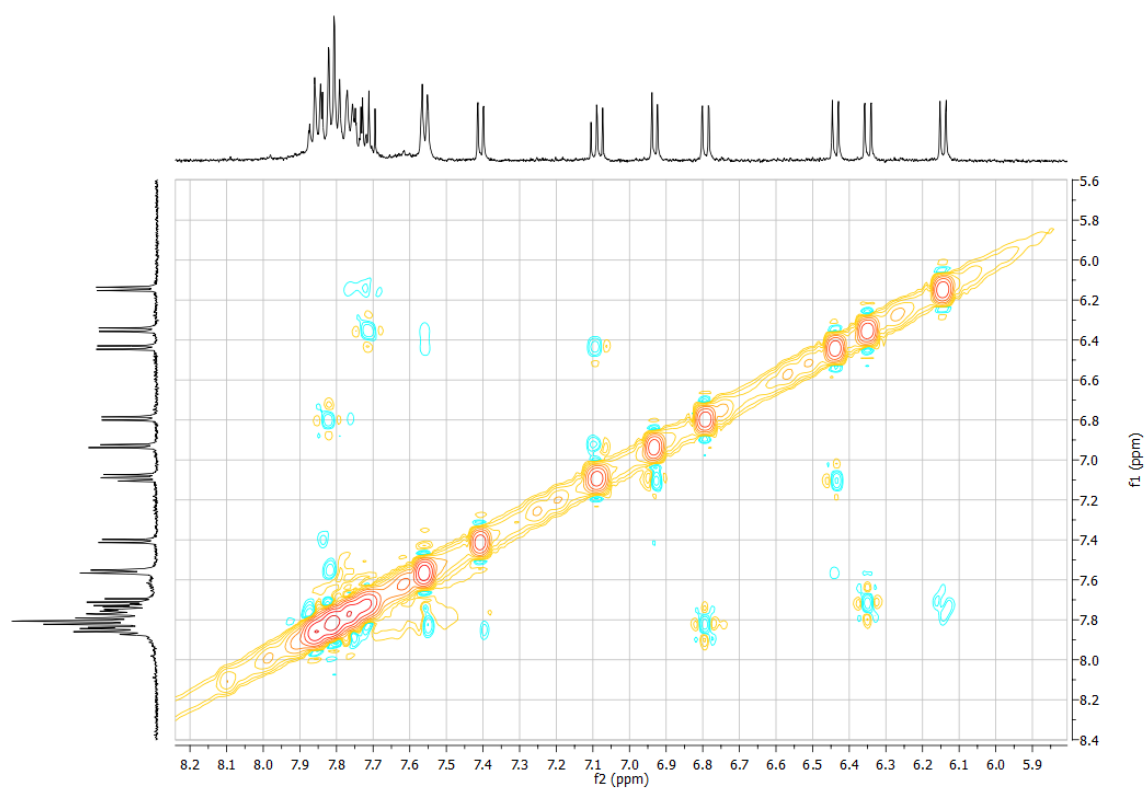

**Figure S66.** NOESY NMR spectrum of **5** (CD<sub>3</sub>OD, 300K, 500 MHz).

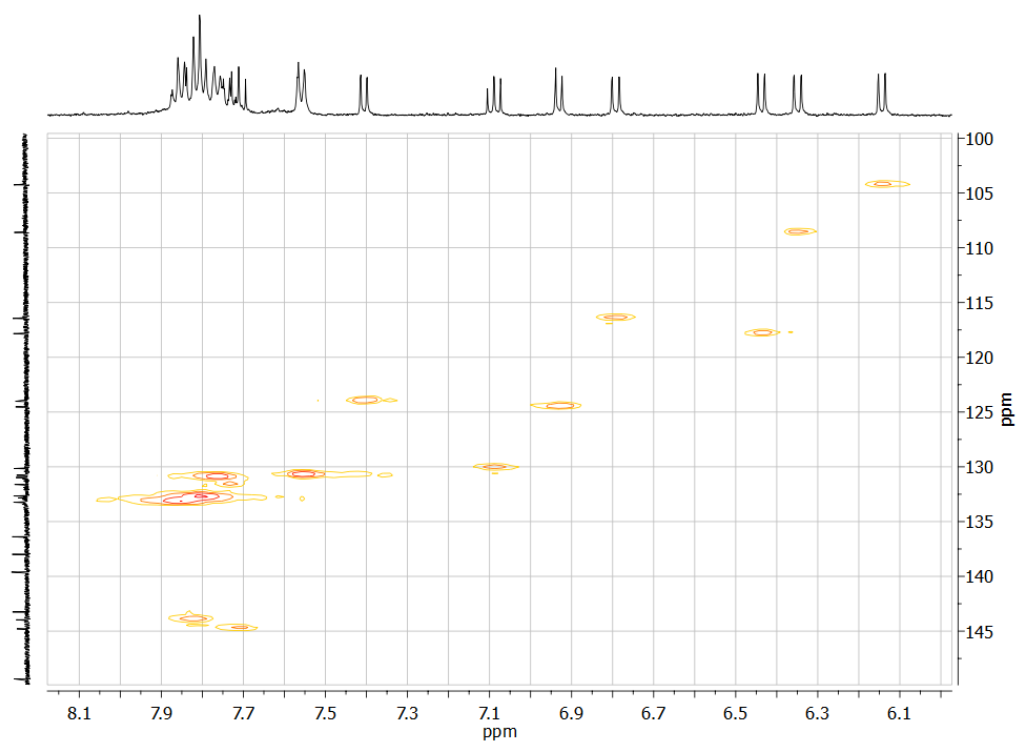

**Figure S67.** HSQC NMR spectrum of **5** ( $\text{CD}_3\text{OD}$ , 300K, 500, 126 MHz).

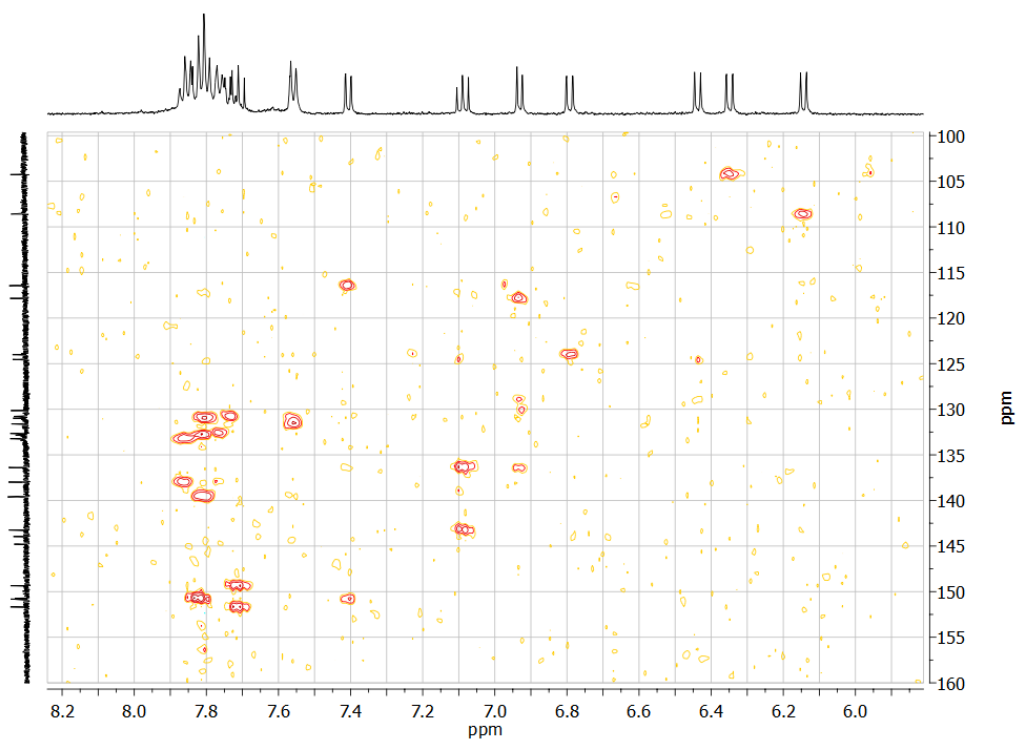

**Figure S68.** HMBC NMR spectrum of **5** ( $\text{CD}_3\text{OD}$ , 300K, 500, 126 MHz).

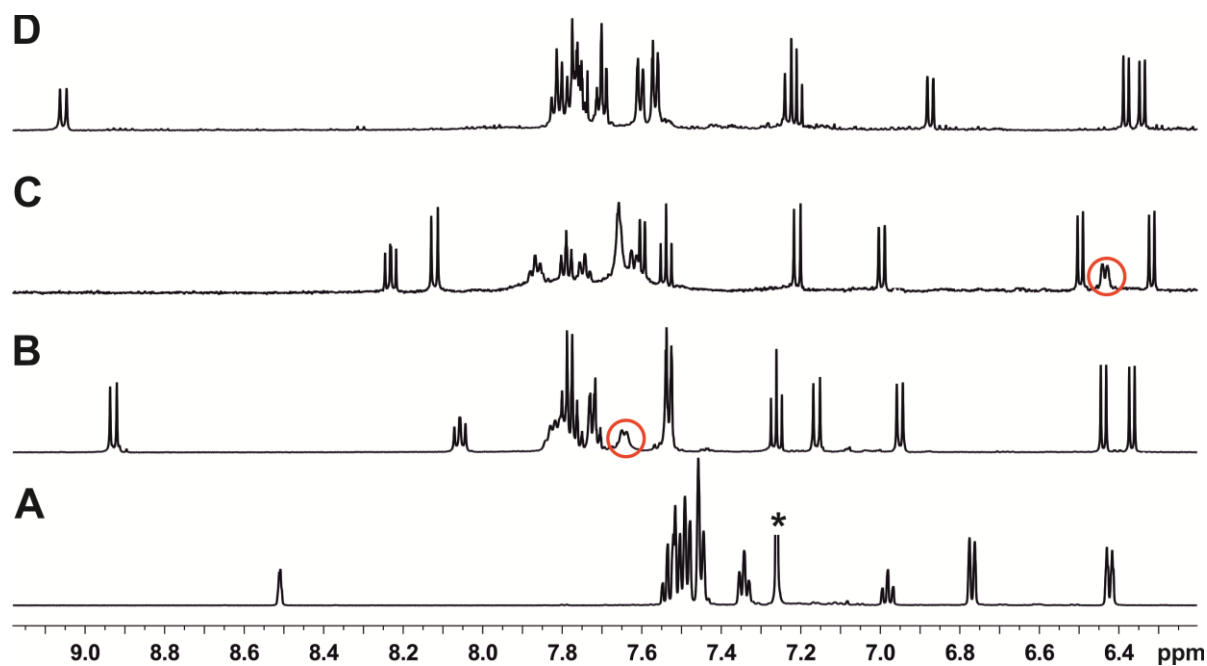

**Figure S69.** NMR stacking of NMR spectra; A: **1d**, B: **3**, C: **3-O-3**, D: **4**. \* peak was suppressed, solvent peak. All spectra were recorded at 300 K, 600 MHz. Solvent in spectrum A: CDCl<sub>3</sub>, solvent in spectra B, C and D: CD<sub>3</sub>OD.

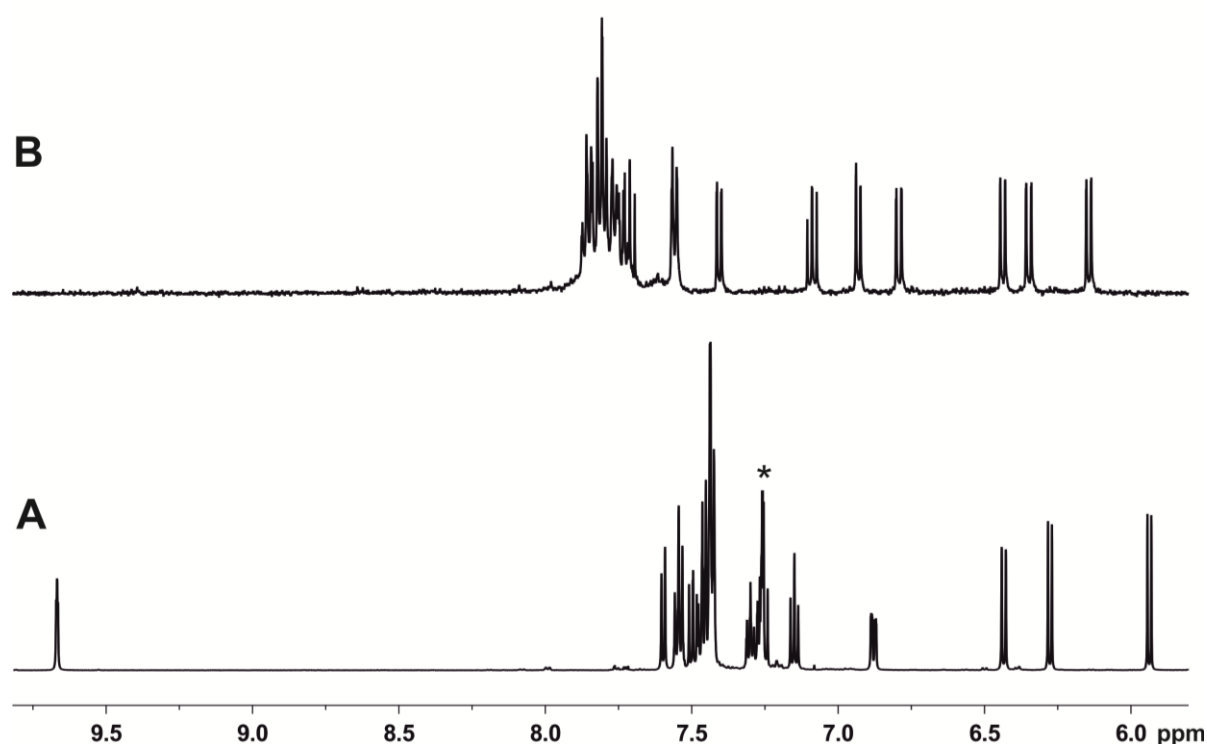

**Figure S70.** NMR stacking of NMR spectra; A: **1e**, B: **5**. \* peak was suppressed, solvent peak. All spectra were recorded at 300 K, 600 MHz. Solvent in spectrum A: CDCl<sub>3</sub>, solvent in spectrum B: CD<sub>3</sub>OD.



## 4. Mass spectra.

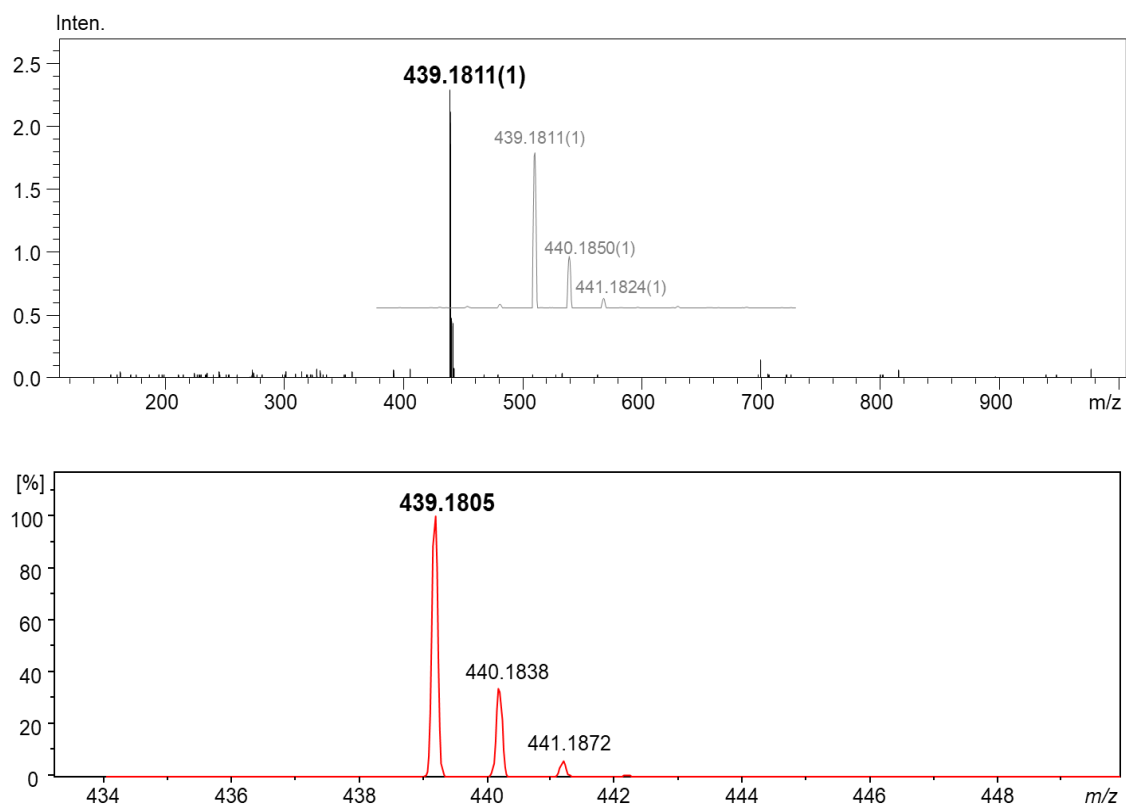

Figure S71. MS spectrum recorded for **1a** (above) compared with simulated pattern (below).

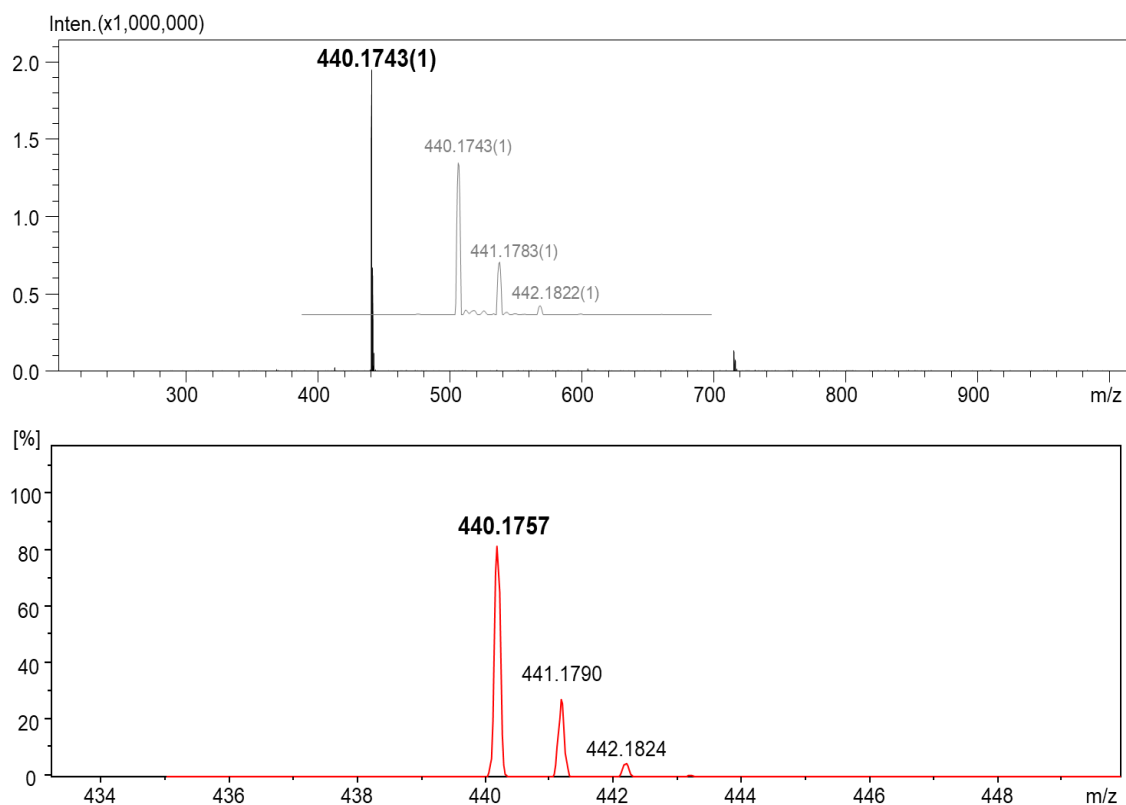

Figure S72. MS spectrum recorded for **1b** (above) compared with simulated pattern (below).

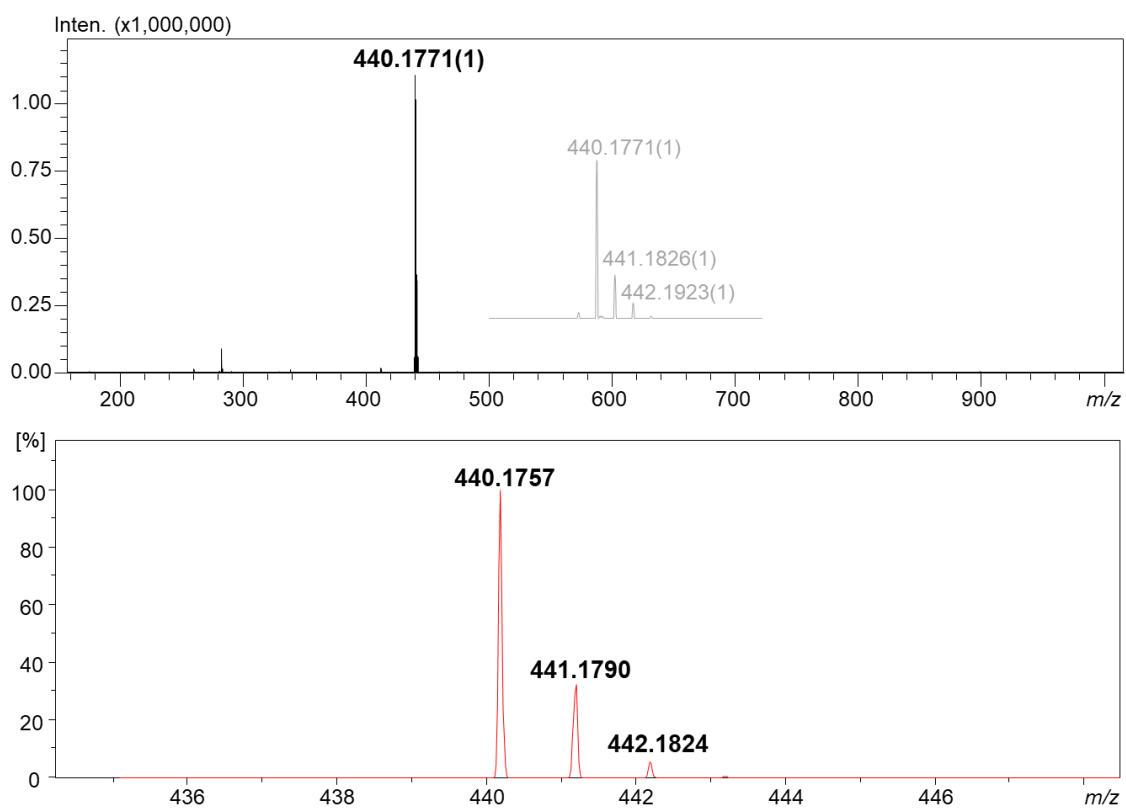

**Figure S73.** MS spectrum recorded for **1c** (above) compared with simulated pattern (below).

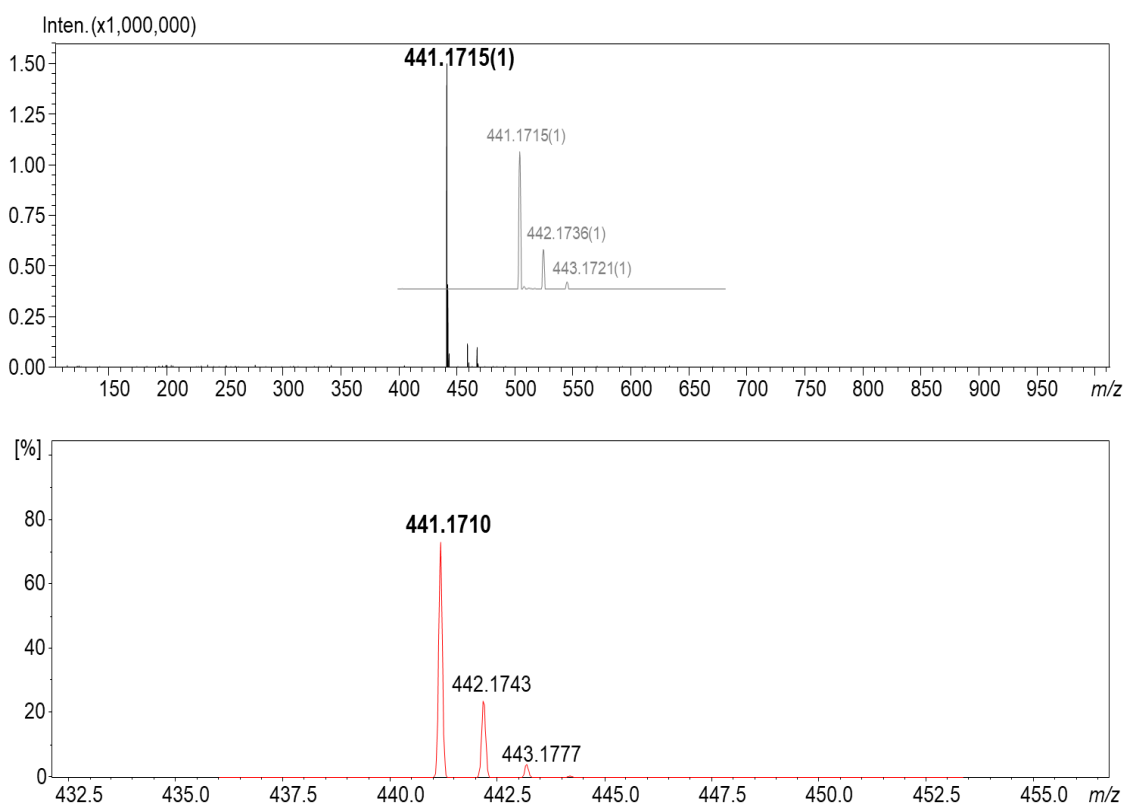

**Figure S74.** MS spectrum recorded for **1d** (above) compared with simulated pattern (below).

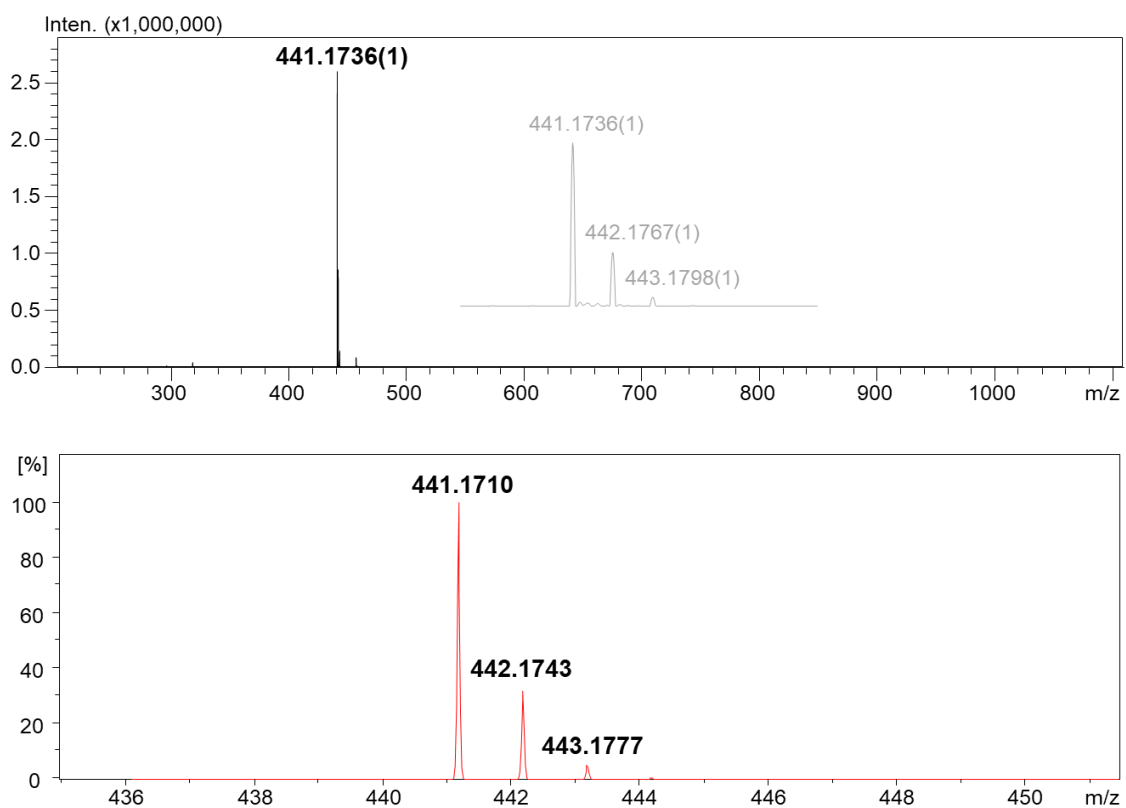

**Figure S75.** MS spectrum recorded for **1e** (above) compared with simulated pattern (below).

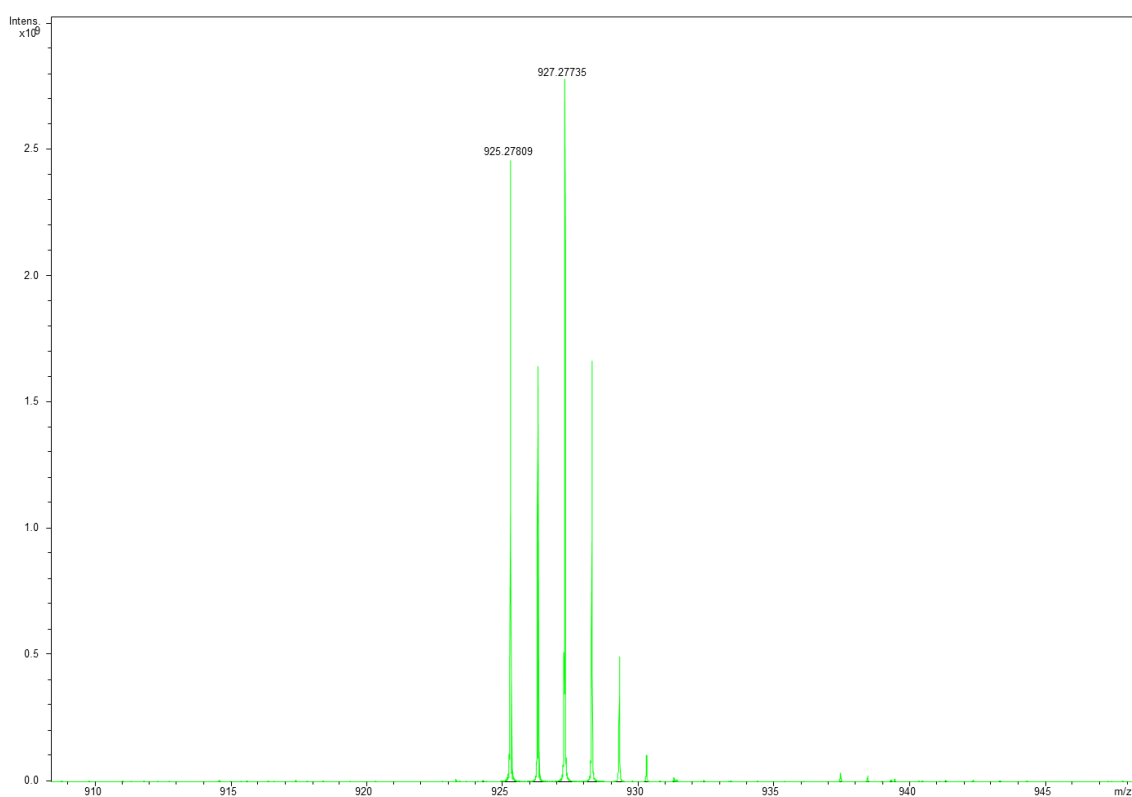

**Figure S76.** MS spectrum recorded for **2a**.

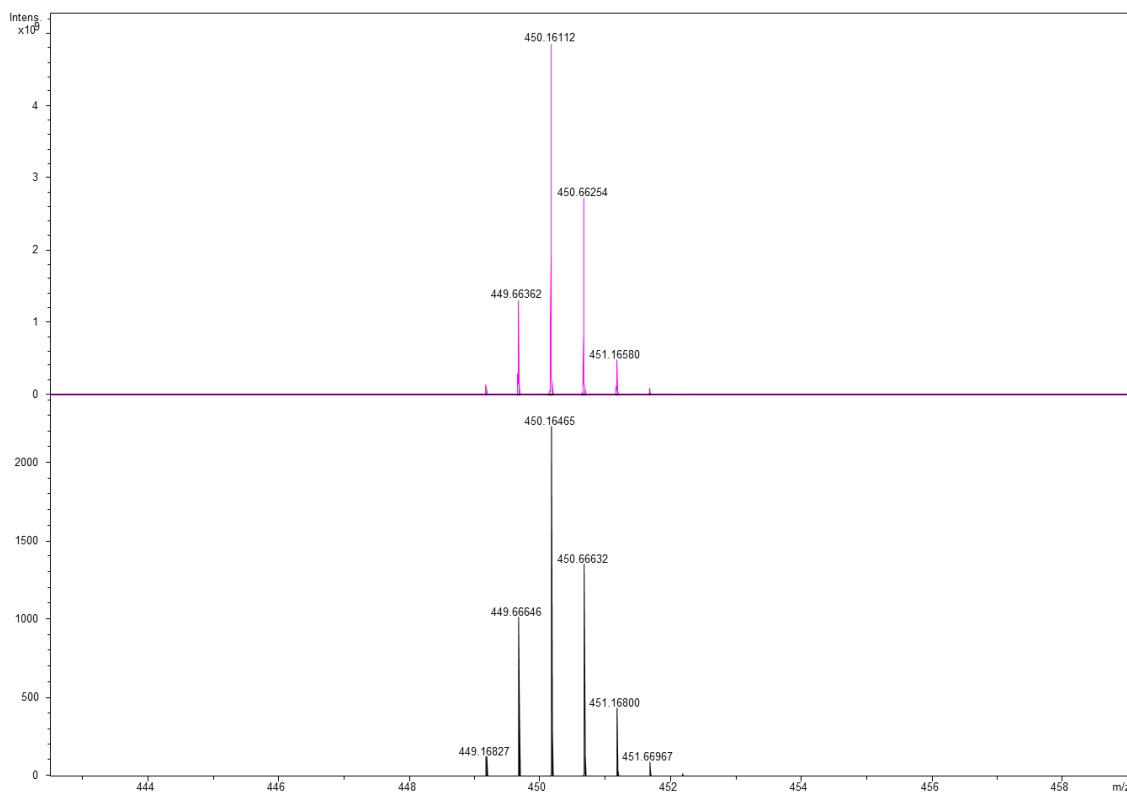

**Figure S77.** ESI-MS spectrum recorded for **3** (above) compared with simulated pattern (below).

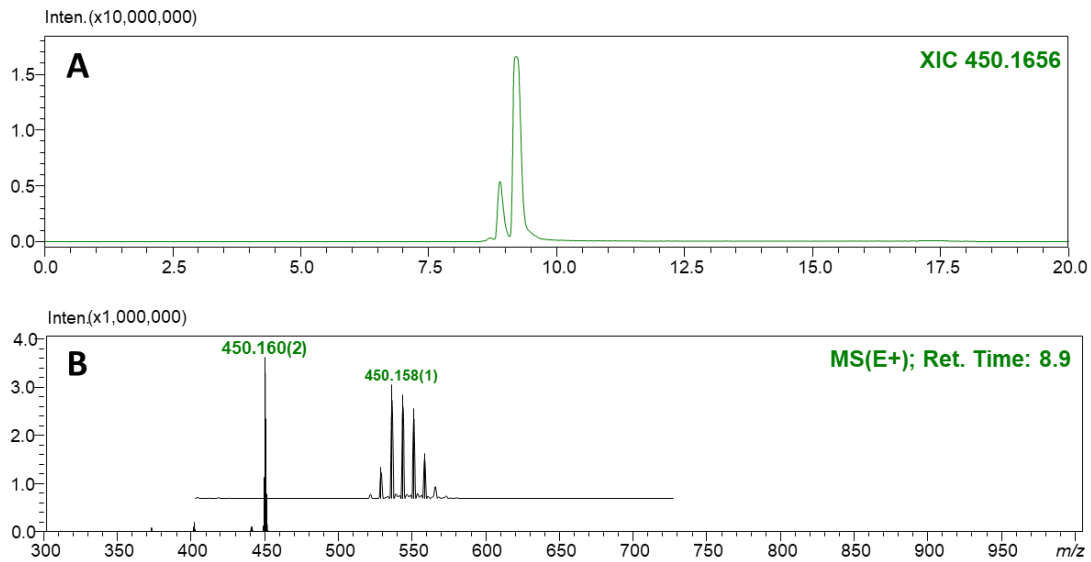

**Figure S78.** LC-MS analysis for compound **3** (A); ESI-MS spectra (B).

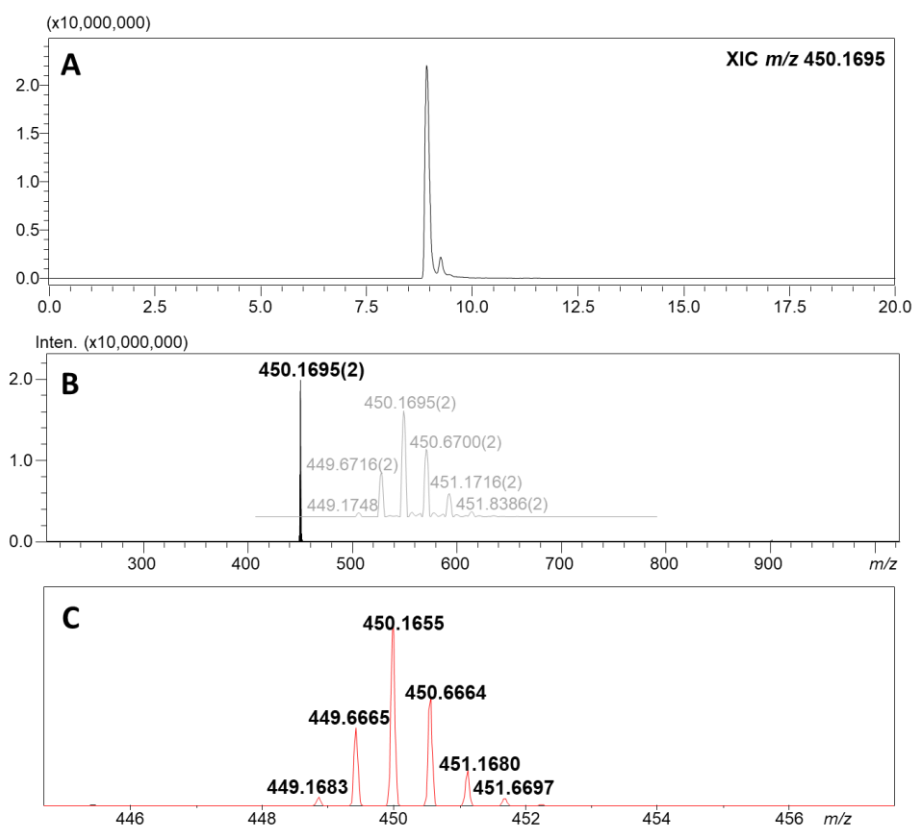

Figure S79. LC-MS analysis for compound 4 (A); ESI-MS spectra (B), simulated pattern (C).

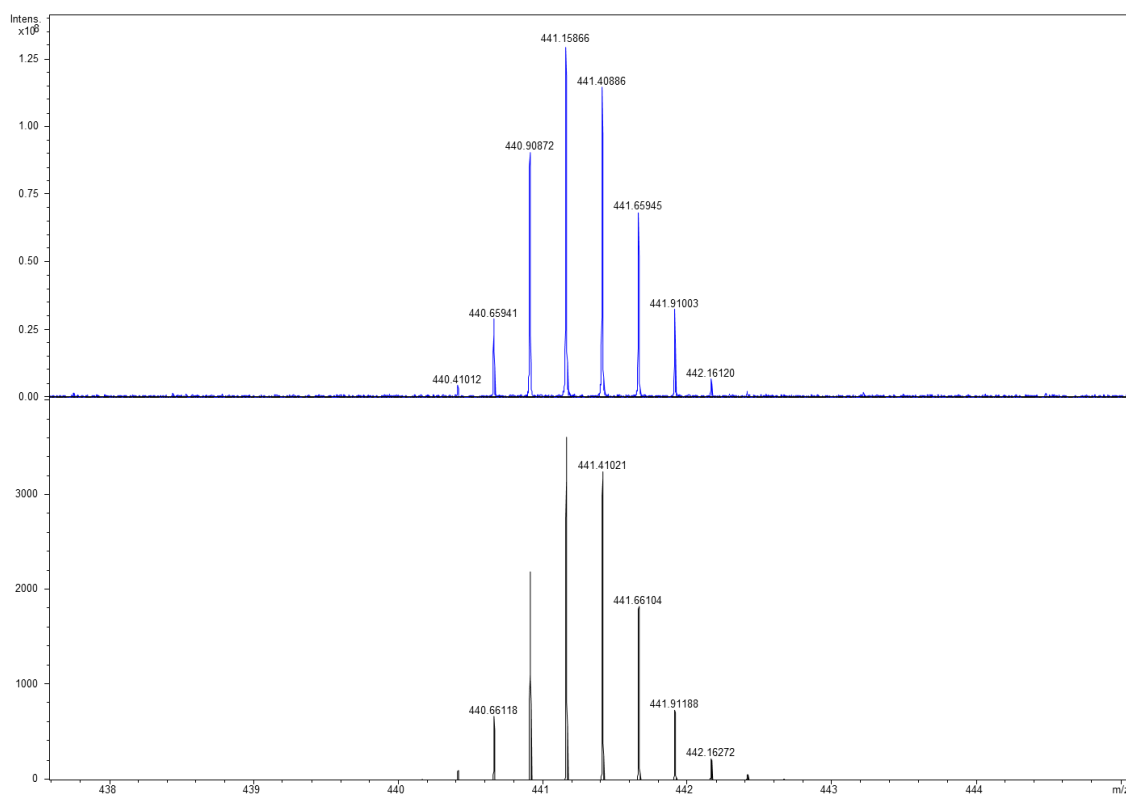

Figure S80. ESI-MS spectrum recorded for 3-O-3 (above) compared with simulated pattern (below).

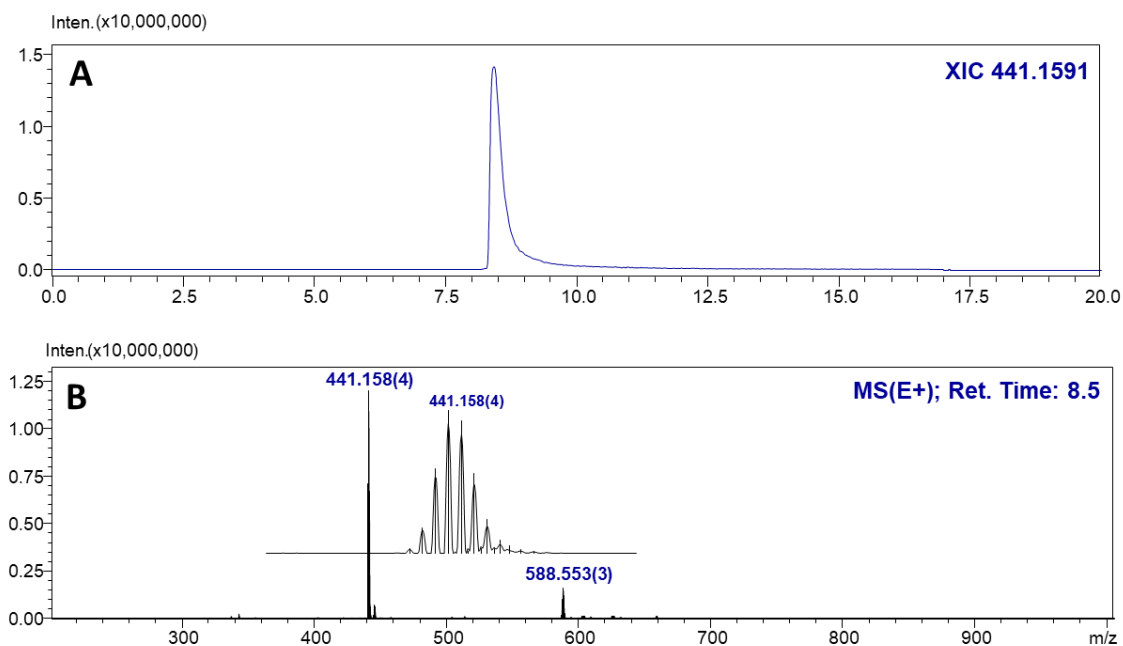

Figure S81. LC-MS analysis for compound **3-O-3** (A); ESI-MS spectra (B).

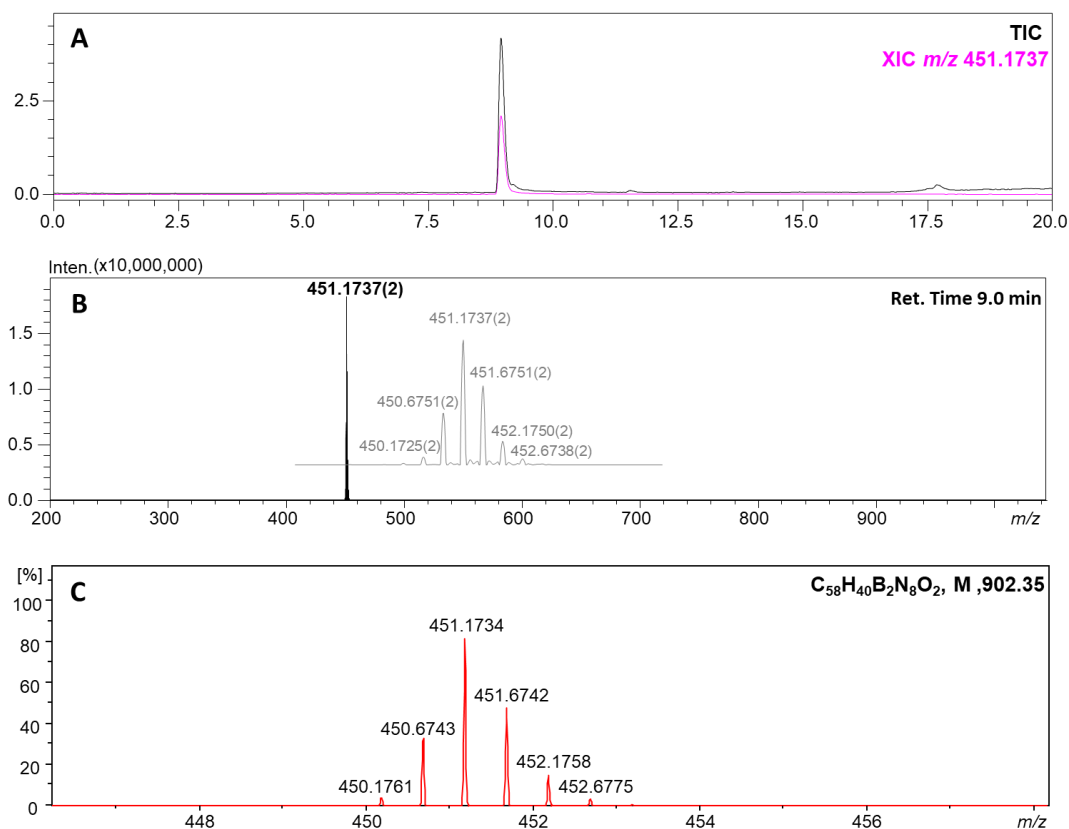

Figure S82. LC-MS analysis for compound **5** (A); ESI-MS spectra (B), simulated pattern (C).

## 5. UV-VIS spectra.

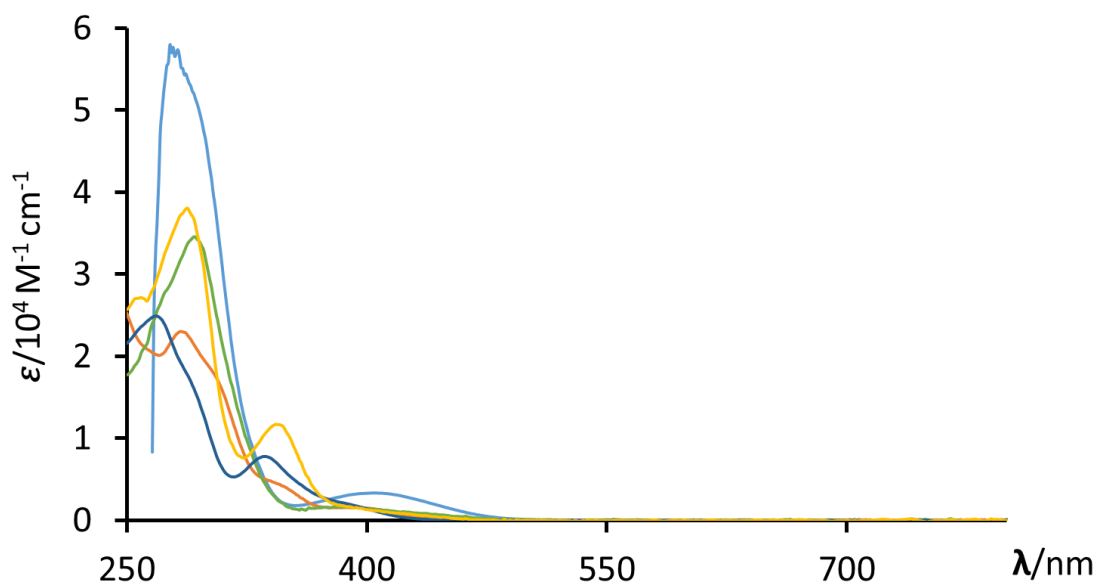

**Figure S83.** Extinction spectrum for macrocycles **1a-e**; **1a** (orange), **1b** (blue), **1c** (green), **1d** (cyan), **1e** (yellow) (CH<sub>2</sub>Cl<sub>2</sub>, 295 K).

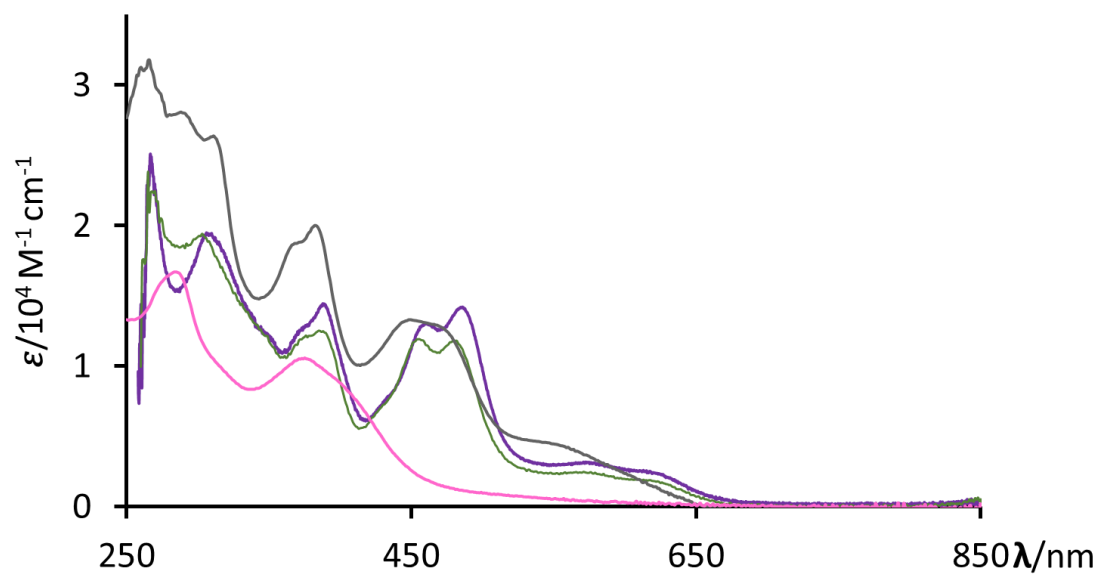

**Figure S84.** Extinction spectrum for boron(III) complexes, structures **3**, **4**, **3-O-3** and **5**; **3** (purple), **4** (grey), **3-O-3** (dark green), and **5** (pink), (CH<sub>2</sub>Cl<sub>2</sub>, 295 K).

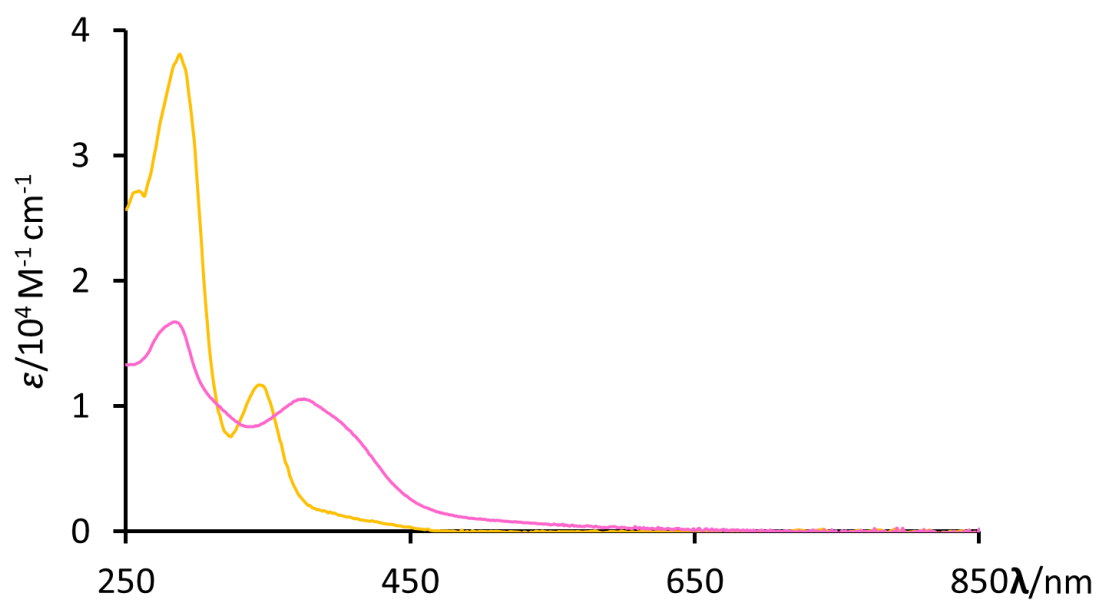

**Figure S85.** Extinction spectrum for structures **1e** and **5**; **1e** (yellow), **5** (pink) ( $\text{CH}_2\text{Cl}_2$ , 295 K).



## 6. Emission spectra.

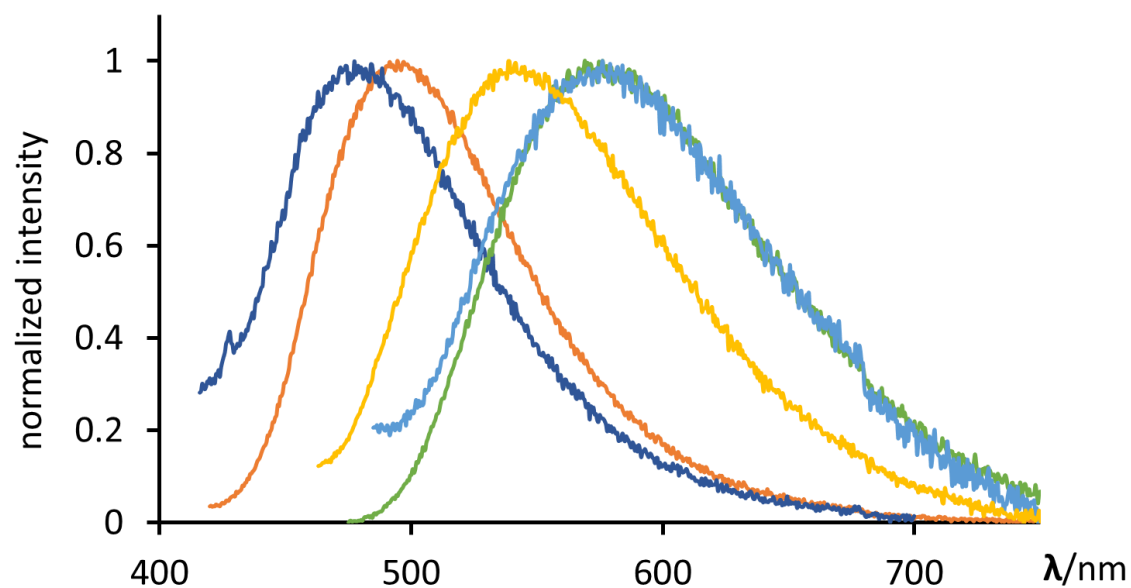

**Figure S86.** Normalized emission spectrum for the monomers **1a-1e**; **1a** (orange), **1b** (blue), **1c** (green), **1d** (cyan), **1e** (yellow) ( $\text{CH}_2\text{Cl}_2$ , 295 K).

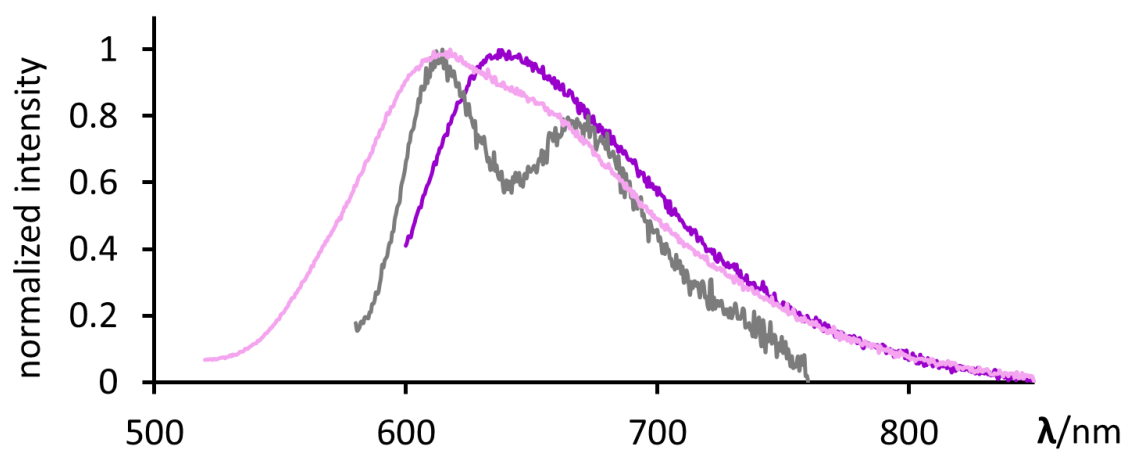

**Figure S87.** Normalized emission spectrum for the boron complexes **3, 4** and **5**, **3** (purple), **4** (grey), **5** (pink).

**Table S1.** Emission properties for macrocycles **1a-e** and boron(III) complexes **3-5**.

| Structure | $\lambda_{\text{emission}}^{[a]}$ | $\lambda_{\text{excitation}}^{[b]}$ | $\Phi^{[c]}$ |
|-----------|-----------------------------------|-------------------------------------|--------------|
| -         | nm                                | nm                                  | %            |
| <b>1a</b> | 495                               | 290                                 | 8.49         |
| <b>1b</b> | 478                               | 270                                 | 5.45         |
| <b>1c</b> | 576                               | 290                                 | <1           |
| <b>1d</b> | 576                               | 310                                 | <1           |
| <b>1e</b> | 539                               | 280                                 | 3.00         |
| <b>3</b>  | 637                               | 575                                 | <1           |
| <b>4</b>  | 615                               | 425                                 | <1           |
| <b>5</b>  | 618                               | 350                                 | 2.62         |

[a] Emission maxima. [b] Excitation wavelength. [c] Quantum yield.

## 7. Lifetime measurements.

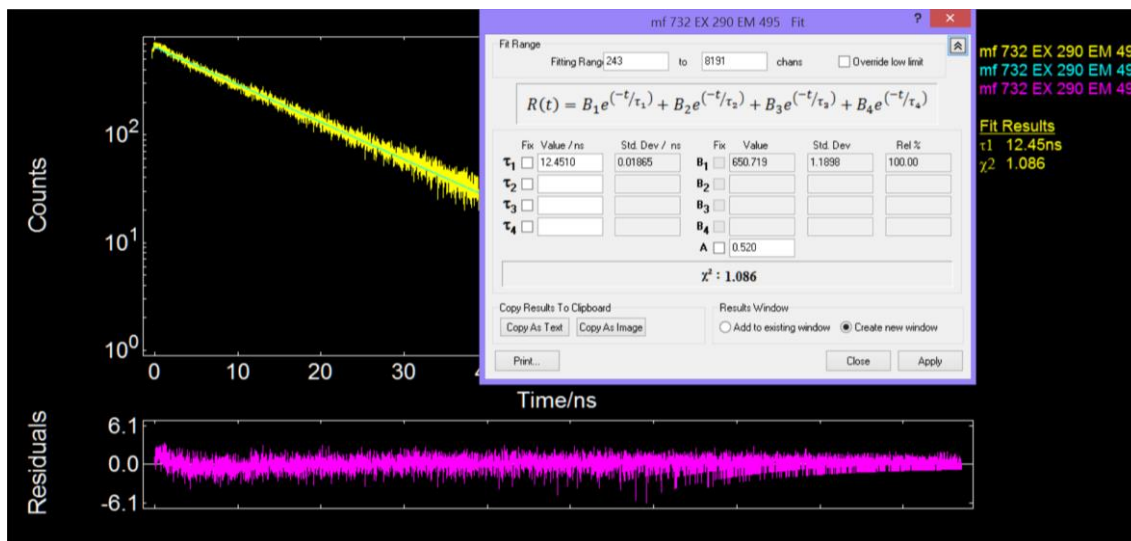

Figure S88. Linear fitting for 1a.

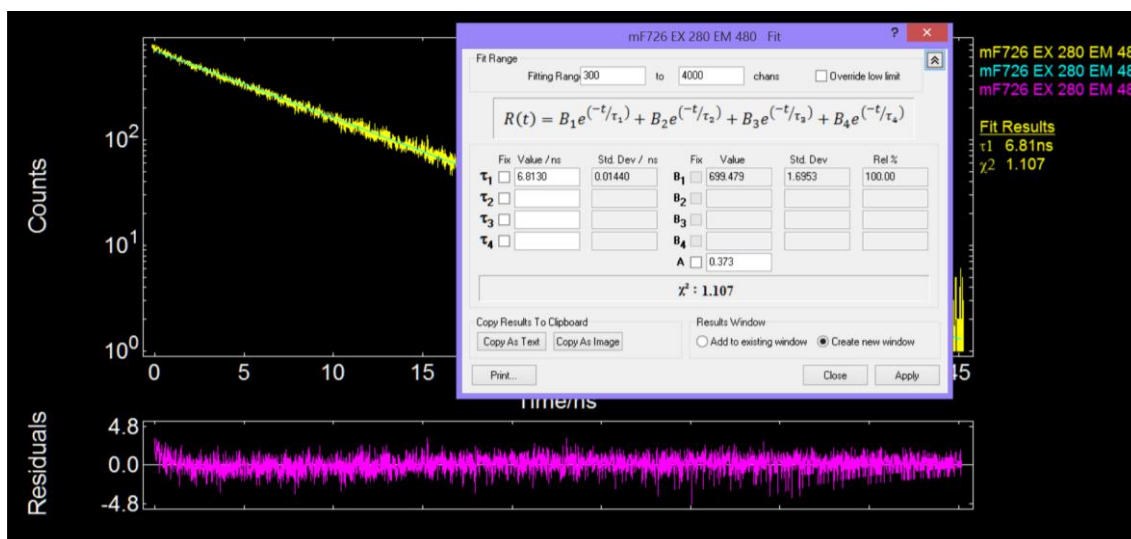

Figure S89. Linear fitting for 1b.

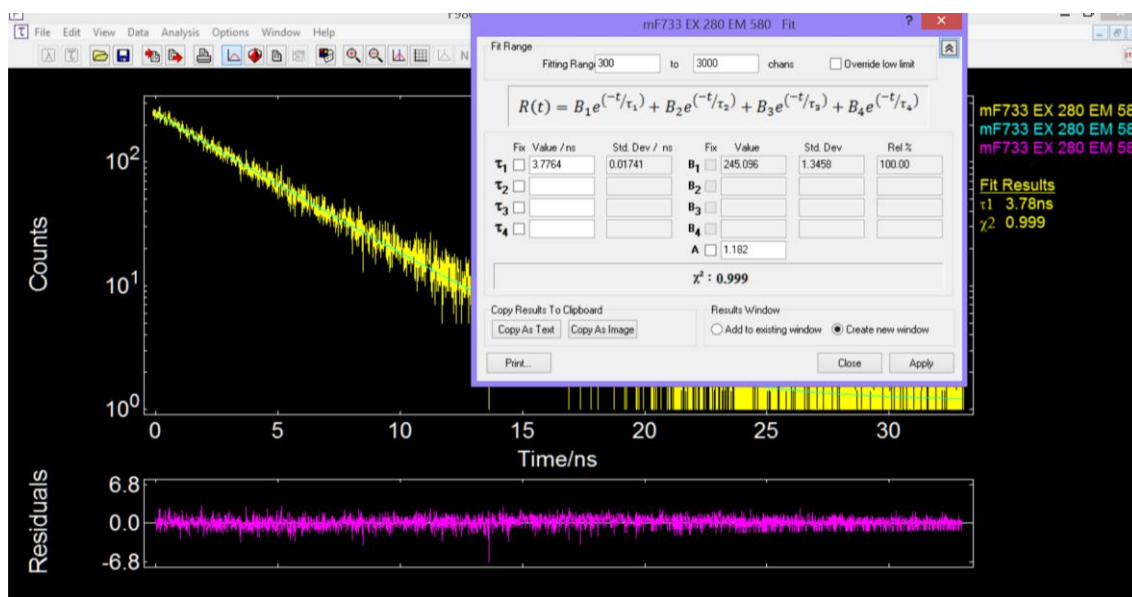

Figure S90. Linear fitting for 1c.

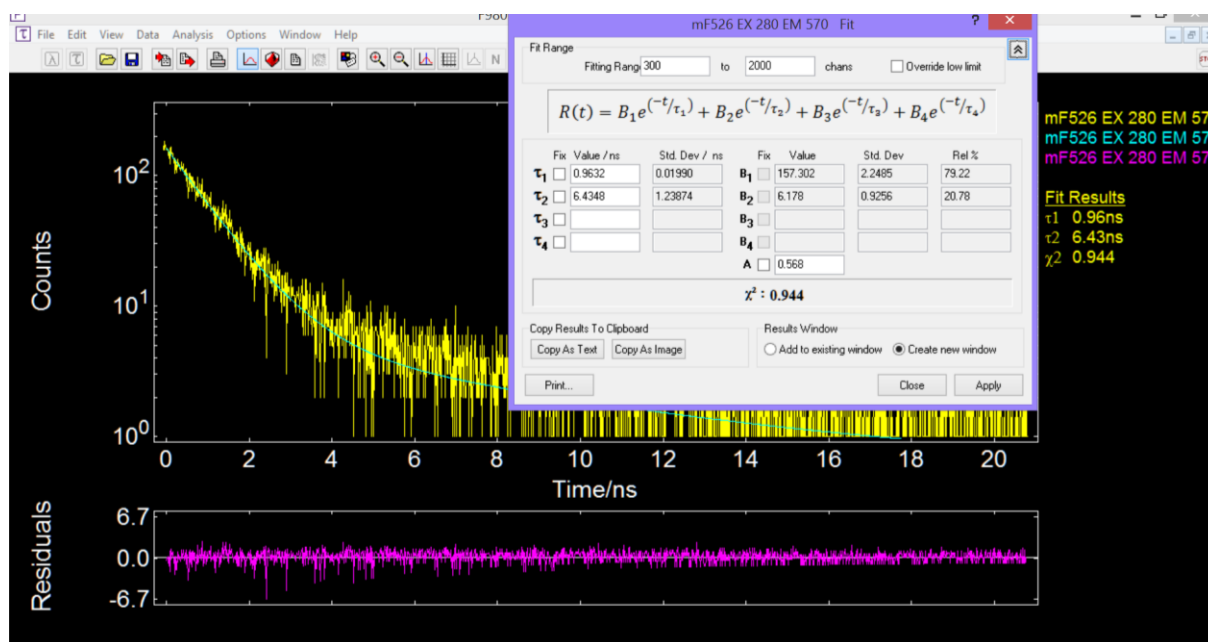

Figure S91. Linear fitting for 1d.

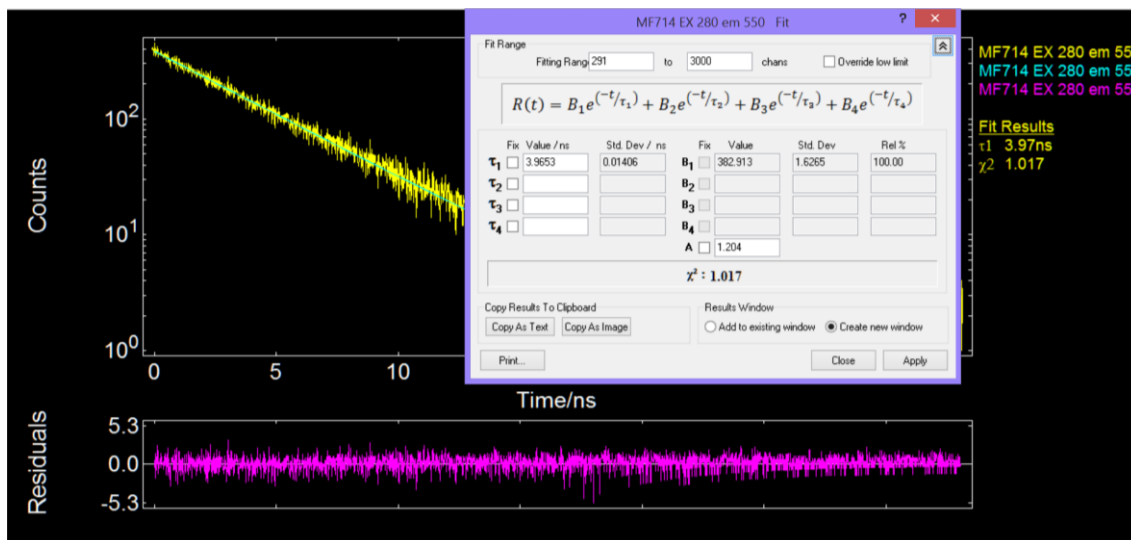

Figure S92. Linear fitting for 1e.

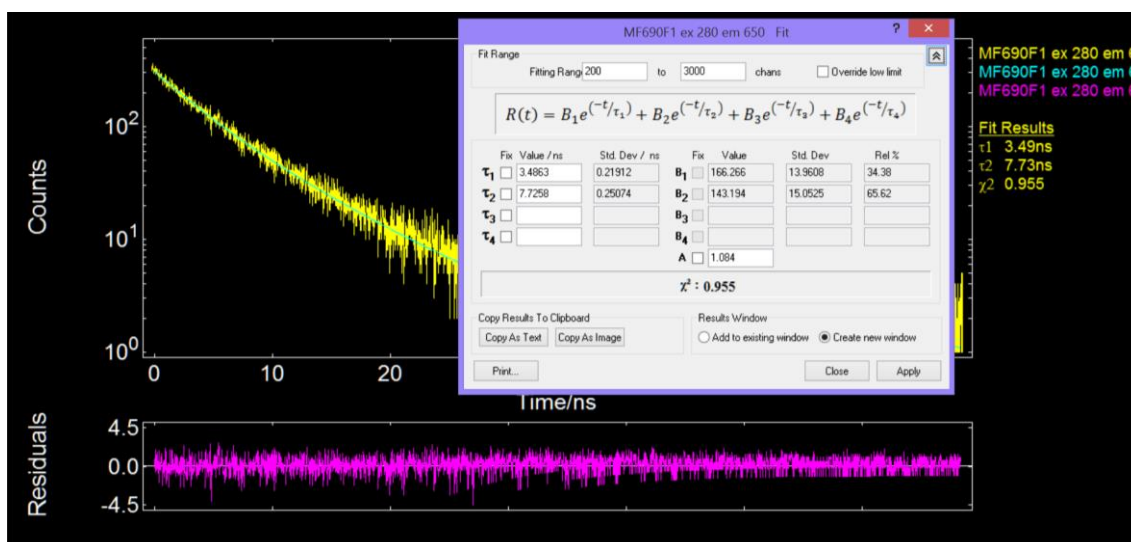

Figure S93. Linear fitting for 3.

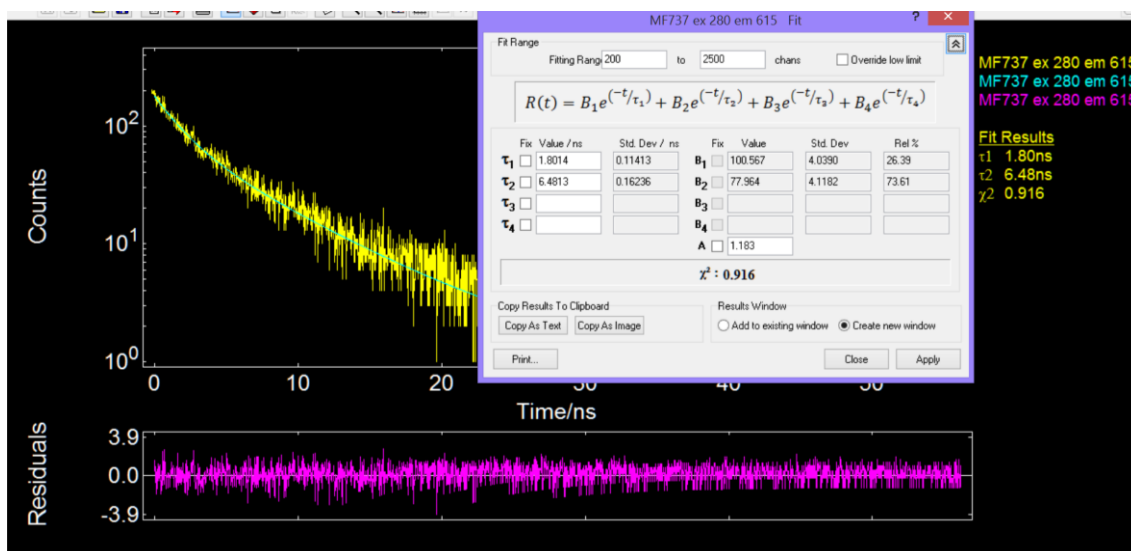

Figure S94. Linear fitting for 4.

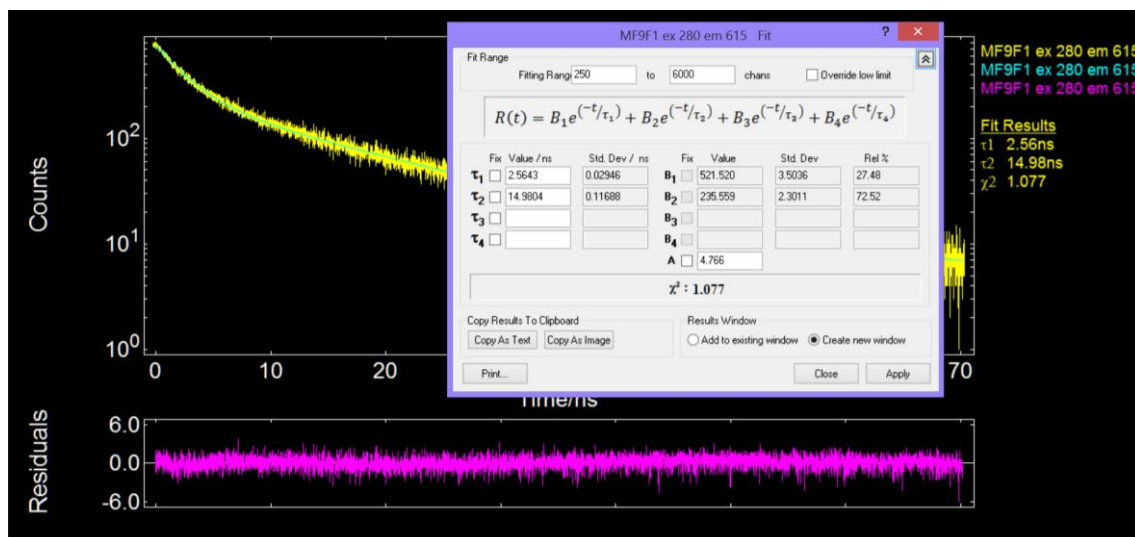

Figure S95. Linear fitting for 5.

## 8. Theoretical calculations.

### 8.1. Optimization details.

**Table S2.** optimization details for macrocycles **1a-e** and boron(III) complexes **3-5**.

| Structure      | Code <sup>[a]</sup> | SCF $E$ <sup>[b]</sup> | ZPV <sup>[c]</sup> | lowest freq. <sup>[d]</sup> | $G$ <sup>[e]</sup> |
|----------------|---------------------|------------------------|--------------------|-----------------------------|--------------------|
|                |                     | a.u.                   | a.u.               | $\text{cm}^{-1}$            | a.u.               |
| <b>1a</b>      | 1a                  | -1379.290953           | 0.445233           | 21.63                       | -1378.845720       |
| <b>1b</b>      | 1b                  | -1395.340741           | 0.433302           | 21.42                       | -1394.907439       |
| <b>1c</b>      | 1c                  | -1395.346751           | 0.433585           | 21.85                       | -1394.913167       |
| <b>1d</b>      | 1d                  | -1411.388286           | 0.421073           | 15.06                       | -1410.967213       |
| <b>1e</b>      | 1e                  | -1411.393268           | 0.421353           | 19.58                       | -1410.971915       |
| <b>3</b>       | 3                   | -2871.291011           | 0.842435           | 13.40                       | -2870.448575       |
| <b>4</b>       | 4                   | -2871.293229           | 0.841793           | 12.68                       | -2870.451436       |
| 3- <b>O</b> -3 | 3- <b>O</b> -3      | -5589.688333           | 1.634899           | 13.64                       | -5588.053434       |
| <b>5</b>       | 5                   | -2872.462636           | 0.862617           | 10.17                       | -2871.600019       |

[a] Optimized geometry available as <code>.pdb file. [b] Electronic energy. [c] Zero-point vibrational energy. [d] Lowest vibrational frequency. [e] Gibbs free energy.

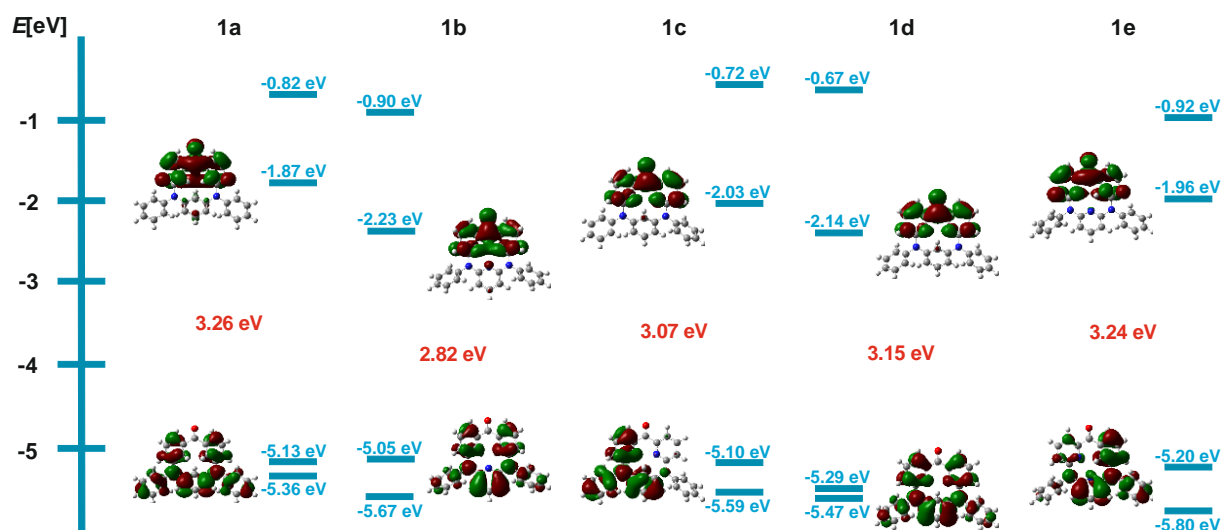

**Figure S96.** graphic representation of the frontier orbitals for **1a-e** with calculated energies (H+1, H, L, L-1).

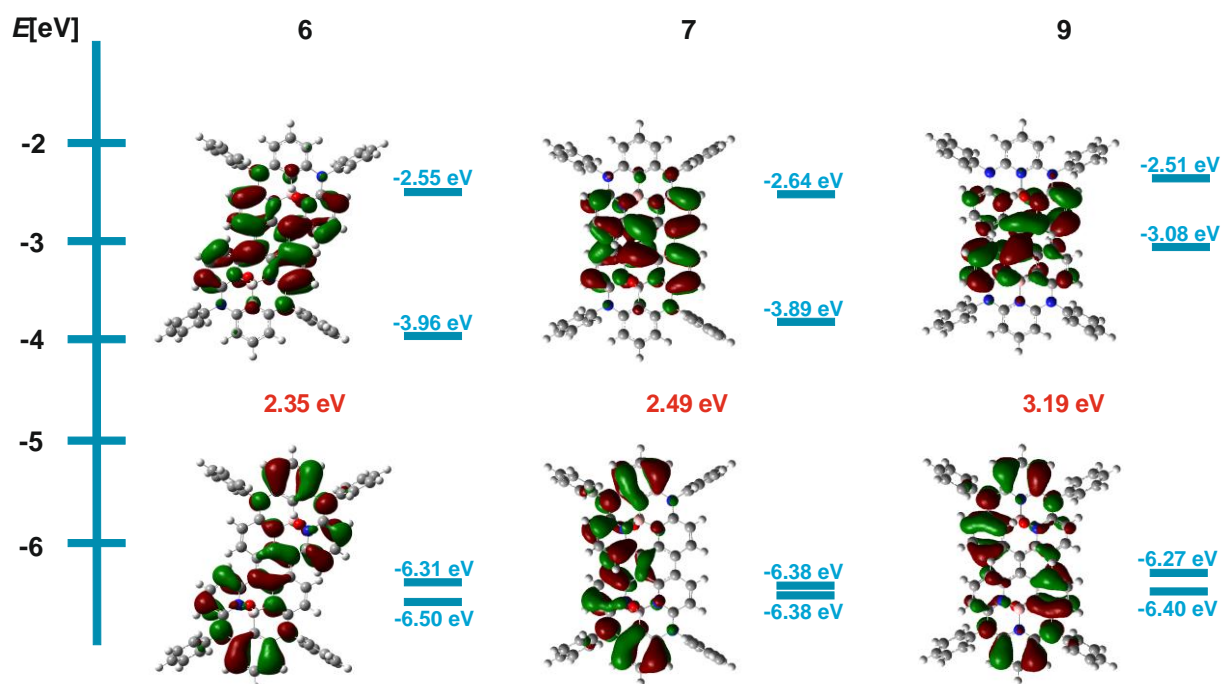

Figure S97. graphic representation of the frontier orbitals for **3**, **4** and **5** with calculated energies (H+1, H, L, L-1).



## 8.2. TD-DFT predicted UV Vis transitions.

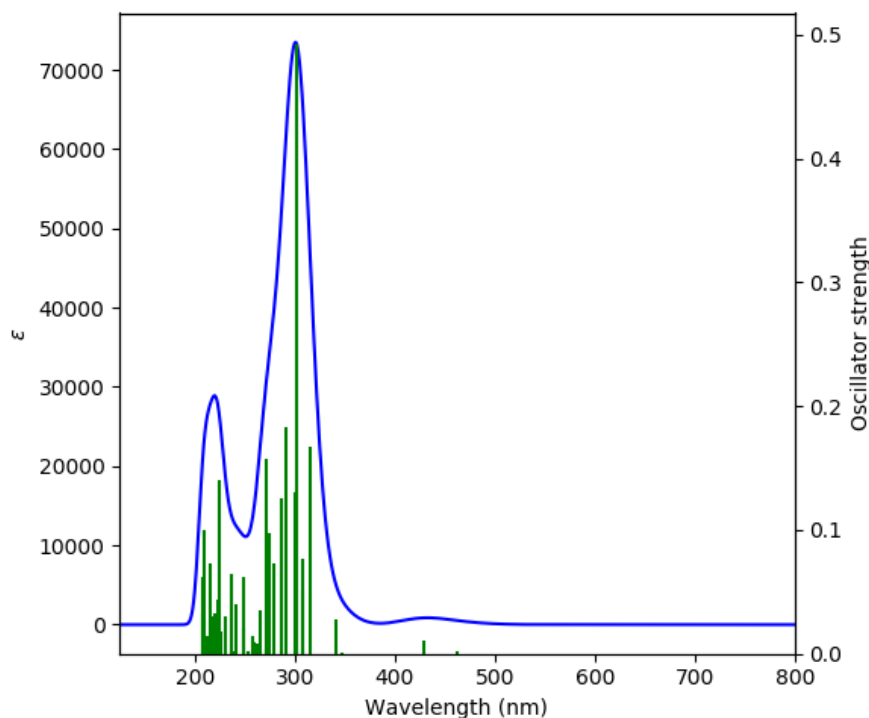

**Figure S98.** TD-DFT predicted absorption spectra for **1a** (solvent dichloromethane).

**Table S3.** UV-Vis transitions (oscillator strength > 0.01) calculated with TD-DFT for **1a**.

| No. | Energy (cm <sup>-1</sup> ) | Wavelength (nm) | Osc. Strength | Major contribs                    |
|-----|----------------------------|-----------------|---------------|-----------------------------------|
| 1   | 21590.66                   | 463.1633        | 0.0026        | HOMO->LUMO (99%)                  |
| 2   | 23282                      | 429.5164        | 0.0108        | H-1->LUMO (99%)                   |
| 4   | 29255.34                   | 341.8179        | 0.0278        | H-2->LUMO (16%), HOMO->L+1 (66%)  |
| 5   | 31707.27                   | 315.3851        | 0.1671        | H-1->L+1 (97%)                    |
| 6   | 32411.39                   | 308.5335        | 0.0509        | HOMO->L+2 (93%)                   |
| 7   | 32495.27                   | 307.7371        | 0.0772        | H-1->L+2 (79%)                    |
| 8   | 33079.22                   | 302.3046        | 0.493         | HOMO->L+3 (82%)                   |
| 9   | 33234.88                   | 300.8887        | 0.13          | HOMO->L+4 (86%)                   |
| 10  | 34259.21                   | 291.8923        | 0.1834        | H-6->LUMO (37%), H-2->LUMO (34%)  |
| 11  | 34853.64                   | 286.9141        | 0.1259        | HOMO->L+5 (78%)                   |
| 14  | 35723.1                    | 279.9309        | 0.0727        | H-1->L+3 (77%)                    |
| 15  | 36411.09                   | 274.6416        | 0.097         | H-9->LUMO (10%), H-3->LUMO (63%)  |
| 18  | 36857.92                   | 271.3121        | 0.158         | H-4->LUMO (90%)                   |
| 19  | 37712.87                   | 265.1615        | 0.0352        | H-5->LUMO (97%)                   |
| 23  | 38831.56                   | 257.5225        | 0.0144        | H-10->LUMO (18%), H-8->LUMO (70%) |
| 25  | 40113.98                   | 249.2896        | 0.0208        | HOMO->L+8 (81%)                   |
| 26  | 40259.16                   | 248.3907        | 0.0624        | H-10->LUMO (75%), H-8->LUMO (19%) |
| 27  | 41547.23                   | 240.6899        | 0.0406        | H-2->L+1 (36%), HOMO->L+9 (45%)   |
| 29  | 42266.68                   | 236.593         | 0.0649        | H-2->L+1 (43%), HOMO->L+9 (43%)   |

|    |          |          |        |                                                  |
|----|----------|----------|--------|--------------------------------------------------|
| 30 | 43390.21 | 230.4667 | 0.0306 | H-1->L+9 (83%)                                   |
| 31 | 44200.8  | 226.2403 | 0.0182 | H-4->L+1 (14%), H-2->L+2 (14%), HOMO->L+10 (61%) |
| 33 | 44593.59 | 224.2475 | 0.1403 | H-3->L+1 (60%)                                   |
| 34 | 44683.12 | 223.7982 | 0.0435 | H-4->L+1 (50%)                                   |
| 37 | 45383.2  | 220.3458 | 0.0325 | H-5->L+1 (46%), H-4->L+1 (18%), H-2->L+4 (10%)   |
| 38 | 45603.39 | 219.2819 | 0.0251 | H-5->L+1 (36%), H-2->L+4 (38%)                   |
| 39 | 45752.61 | 218.5668 | 0.0299 | H-4->L+2 (15%), H-2->L+3 (17%), H-1->L+10 (51%)  |
| 43 | 46254.28 | 216.1962 | 0.073  | H-9->L+1 (32%), H-4->L+2 (32%), H-3->L+1 (18%)   |
| 45 | 47111.65 | 212.2617 | 0.0146 | H-8->L+1 (26%), H-3->L+2 (39%), H-2->L+5 (21%)   |
| 47 | 47681.88 | 209.7233 | 0.0994 | H-5->L+2 (60%), H-5->L+4 (13%)                   |
| 48 | 47770.61 | 209.3337 | 0.0268 | H-6->L+2 (41%), H-6->L+4 (14%)                   |
| 49 | 47967.41 | 208.4749 | 0.0626 | H-11->LUMO (46%), H-8->L+1 (19%), H-6->L+2 (11%) |
| 50 | 48031.93 | 208.1948 | 0.0322 | H-9->L+1 (13%), H-4->L+4 (49%)                   |

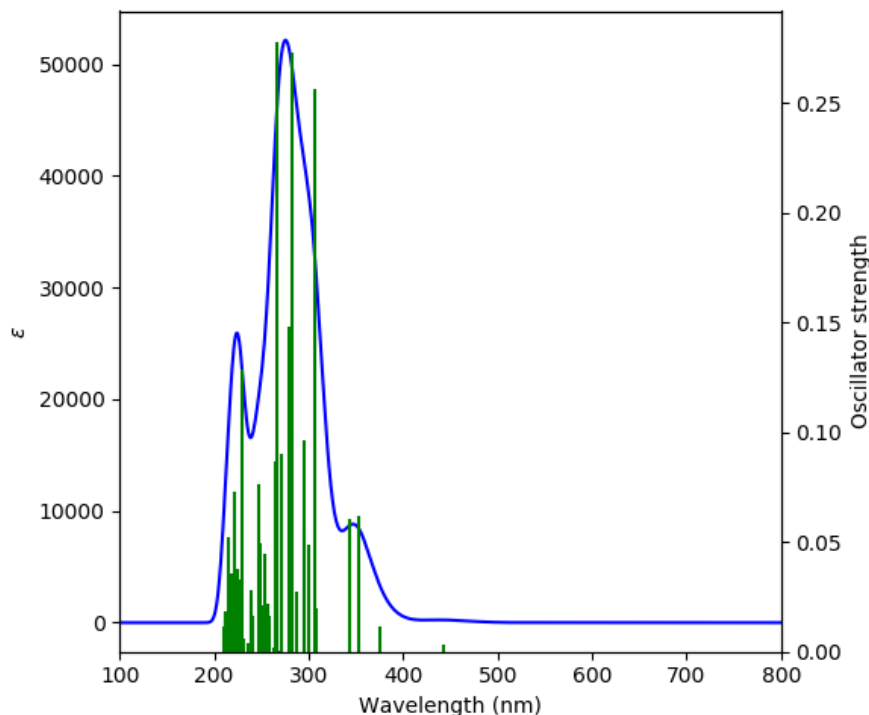

**Figure S99.** TD-DFT predicted absorption spectra for **1b** (solvent dichloromethane).

**Table S4.** UV-Vis transitions (oscillator strength > 0.01) calculated with TD-DFT for **1b**.

| No. | Energy (cm <sup>-1</sup> ) | Wavelength (nm) | Osc. Strength | Major contribs                                                     |
|-----|----------------------------|-----------------|---------------|--------------------------------------------------------------------|
| 1   | 22604.4944272              | 442.389898709   | 0.0033        | HOMO->LUMO (99%)                                                   |
| 2   | 26662.2697595              | 375.061841704   | 0.0114        | H-1->LUMO (98%)                                                    |
| 3   | 28314.8997845              | 353.170948021   | 0.0618        | H-2->LUMO (10%), HOMO->L+1 (85%)                                   |
| 4   | 29159.3622716              | 342.943028275   | 0.0602        | H-5->LUMO (22%), H-3->LUMO (10%), H-2->LUMO (46%), HOMO->L+1 (12%) |
| 5   | 32423.4880458              | 308.418390578   | 0.0197        | HOMO->L+2 (89%)                                                    |
| 6   | 32573.5071696              | 306.997952291   | 0.2561        | HOMO->L+3 (95%)                                                    |
| 7   | 33320.3765708              | 300.116656207   | 0.0486        | H-1->L+1 (86%)                                                     |
| 8   | 33794.6305751              | 295.904995256   | 0.0962        | HOMO->L+4 (88%)                                                    |
| 9   | 33939.8103723              | 294.639241949   | 0.0554        | H-5->LUMO (24%), H-3->LUMO (26%), H-2->LUMO (38%)                  |
| 10  | 34828.6333531              | 287.120080154   | 0.0277        | H-1->L+2 (14%), HOMO->L+6 (76%)                                    |
| 11  | 35383.5428002              | 282.617262394   | 0.2732        | HOMO->L+5 (88%)                                                    |
| 12  | 35855.3771412              | 278.898195956   | 0.1483        | H-1->L+2 (64%), H-1->L+5 (11%), HOMO->L+6 (15%)                    |
| 13  | 36911.1568888              | 270.920795849   | 0.0905        | H-9->LUMO (16%), H-5->LUMO (18%), H-3->LUMO (46%)                  |

|    |               |               |        |                                                                |
|----|---------------|---------------|--------|----------------------------------------------------------------|
| 15 | 37452.3549106 | 267.005907208 | 0.278  | H-4->LUMO (75%), HOMO->L+7 (11%)                               |
| 16 | 37658.8328444 | 265.541952437 | 0.0868 | H-1->L+3 (91%)                                                 |
| 18 | 38753.3272046 | 258.042359749 | 0.0164 | H-1->L+5 (65%)                                                 |
| 19 | 38974.3231181 | 256.57918342  | 0.022  | H-6->LUMO (91%)                                                |
| 21 | 39459.06233   | 253.427208087 | 0.0445 | H-1->L+4 (10%), HOMO->L+8 (67%)                                |
| 22 | 39926.0573444 | 250.462997479 | 0.0212 | H-8->LUMO (66%), H-1->L+6 (16%)                                |
| 23 | 40080.9157947 | 249.495297244 | 0.0497 | H-9->LUMO (20%), H-7->LUMO (41%), H-2->L+1 (17%)               |
| 25 | 40530.1666117 | 246.729802416 | 0.0761 | H-9->LUMO (38%), H-2->L+1 (21%), H-1->L+7 (13%)                |
| 26 | 41452.058324  | 241.242543901 | 0.0164 | H-10->LUMO (92%)                                               |
| 27 | 41748.0637995 | 239.532066637 | 0.0279 | H-2->L+1 (28%), H-1->L+7 (50%)                                 |
| 28 | 41828.7192424 | 239.070193425 | 0.0241 | H-4->L+1 (54%), H-1->L+8 (10%)                                 |
| 32 | 43579.7489077 | 229.464378539 | 0.1285 | H-5->L+1 (12%), H-3->L+1 (66%), H-2->L+3 (12%)                 |
| 33 | 43893.4985806 | 227.824172676 | 0.0103 | H-2->L+2 (81%)                                                 |
| 34 | 44241.9300939 | 226.029921813 | 0.0332 | H-5->L+1 (18%), H-4->L+2 (10%), H-3->L+1 (16%), H-2->L+3 (40%) |
| 35 | 44561.3256478 | 224.409840924 | 0.0375 | H-5->L+1 (49%)                                                 |
| 37 | 44902.4981713 | 222.704758249 | 0.0186 | H-6->L+1 (11%), H-6->L+3 (13%), HOMO->L+10 (16%)               |
| 38 | 44918.6292599 | 222.62478096  | 0.0117 | H-7->L+1 (18%), H-6->L+2 (12%), H-4->L+2 (25%), H-4->L+5 (11%) |
| 39 | 45104.1367785 | 221.709153843 | 0.0726 | H-5->L+1 (11%), H-4->L+2 (15%), H-2->L+3 (37%)                 |
| 41 | 45342.8768895 | 220.541806916 | 0.0102 | H-6->L+1 (23%), H-2->L+5 (16%), H-1->L+9 (27%)                 |
| 42 | 45665.4986611 | 218.983703084 | 0.0359 | H-2->L+4 (69%)                                                 |
| 43 | 46317.1946398 | 215.902540682 | 0.0521 | H-2->L+5 (32%), H-1->L+9 (16%)                                 |
| 47 | 47037.4477449 | 212.596568892 | 0.0145 | H-4->L+3 (18%), H-3->L+4 (14%), H-1->L+9 (11%)                 |
| 48 | 47272.1550837 | 211.541022031 | 0.0172 | H-4->L+3 (16%), H-3->L+2 (44%)                                 |
| 49 | 47289.8992811 | 211.461647244 | 0.0182 | H-3->L+3 (12%), H-2->L+6 (76%)                                 |
| 50 | 47674.6257438 | 209.755186202 | 0.0115 | H-10->L+1 (24%), H-5->L+4 (13%), H-2->L+7 (20%)                |

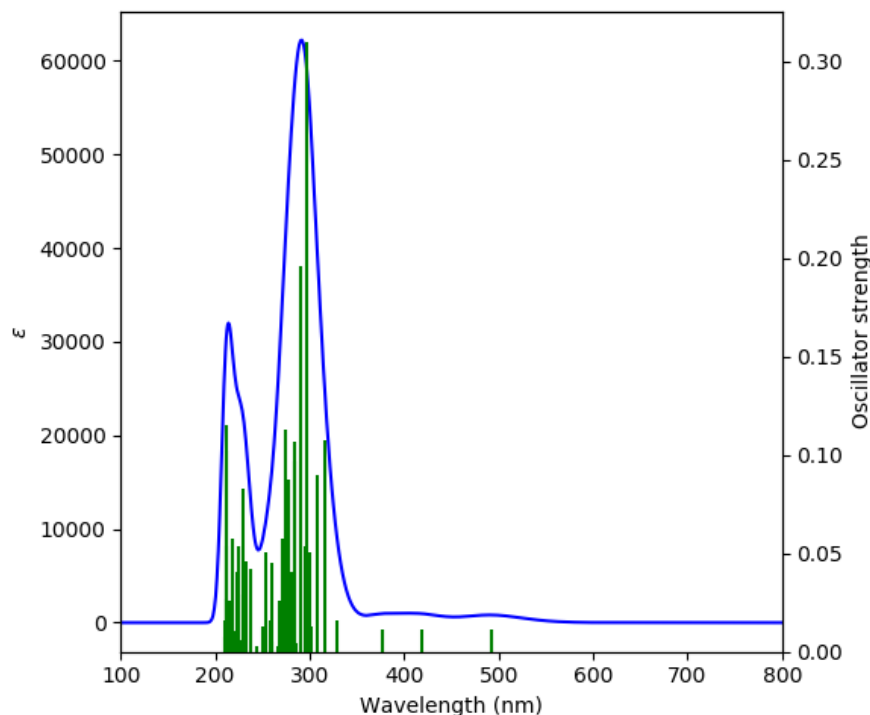

**Figure S100.** TD-DFT predicted absorption spectra for **1c** (solvent dichloromethane).

**Table S5.** UV-Vis transitions (oscillator strength > 0.01) calculated with TD-DFT for **1c**.

|    | Energy (cm <sup>-1</sup> ) | Wavelength (nm) | Osc. Strength | Major contribs                                     |
|----|----------------------------|-----------------|---------------|----------------------------------------------------|
| 1  | 20306.6208589              | 492.45022446    | 0.0111        | HOMO->LUMO (99%)                                   |
| 2  | 23911.1126021              | 418.215587304   | 0.0117        | H-1->LUMO (97%)                                    |
| 3  | 26521.9292888              | 377.04647694    | 0.0117        | H-2->LUMO (83%)                                    |
| 4  | 30339.3514013              | 329.604936762   | 0.0162        | HOMO->L+1 (85%)                                    |
| 5  | 31648.3892395              | 315.971846918   | 0.1073        | HOMO->L+2 (80%)                                    |
| 6  | 32511.4024786              | 307.584393094   | 0.0896        | HOMO->L+3 (16%), HOMO->L+4 (63%)                   |
| 7  | 33055.0201637              | 302.525908333   | 0.0125        | H-10->LUMO (20%), H-7->LUMO (16%), H-6->LUMO (38%) |
| 8  | 33354.2518569              | 299.811851362   | 0.0504        | HOMO->L+3 (66%), HOMO->L+4 (16%)                   |
| 9  | 33600.2509577              | 297.616824725   | 0.31          | HOMO->L+5 (80%)                                    |
| 10 | 33949.4890255              | 294.555243306   | 0.054         | H-3->LUMO (55%), H-1->L+1 (25%)                    |
| 11 | 34429.3889107              | 290.449535016   | 0.1956        | H-3->LUMO (28%), H-1->L+1 (60%)                    |
| 13 | 35185.1304107              | 284.210968761   | 0.0968        | H-4->LUMO (13%), H-1->L+3 (15%), HOMO->L+7 (56%)   |
| 14 | 35268.2055169              | 283.54150299    | 0.1066        | H-4->LUMO (20%), H-1->L+3 (31%), HOMO->L+7 (19%)   |

|    |               |               |        |                                                                   |
|----|---------------|---------------|--------|-------------------------------------------------------------------|
| 15 | 35570.6634278 | 281.130545128 | 0.0403 | H-1->L+3 (14%), HOMO->L+6 (59%)                                   |
| 16 | 36090.08448   | 277.084416511 | 0.0877 | H-1->L+2 (69%), HOMO->L+7 (10%)                                   |
| 17 | 36490.9420312 | 274.040609624 | 0.1126 | H-5->LUMO (21%), H-4->LUMO (13%), H-1->L+4 (46%)                  |
| 18 | 36824.8555649 | 271.55571547  | 0.0572 | H-5->LUMO (53%), H-1->L+4 (27%)                                   |
| 19 | 37103.1168429 | 269.519136151 | 0.0126 | H-8->LUMO (17%), H-7->LUMO (19%), H-6->LUMO (38%)                 |
| 20 | 37226.5196705 | 268.625702551 | 0.0256 | H-8->LUMO (48%), H-7->LUMO (26%)                                  |
| 23 | 38445.2234127 | 260.110336534 | 0.0451 | H-10->LUMO (24%), H-9->LUMO (33%), H-8->LUMO (13%)                |
| 24 | 38721.0650274 | 258.257359216 | 0.0159 | H-10->LUMO (10%), H-1->L+5 (27%), H-1->L+6 (40%), HOMO->L+8 (11%) |
| 25 | 39525.1997931 | 253.003148683 | 0.0505 | H-1->L+6 (11%), HOMO->L+8 (74%)                                   |
| 26 | 39855.887109  | 250.903962384 | 0.0128 | H-2->L+1 (71%)                                                    |
| 28 | 42193.2818443 | 237.004555296 | 0.0424 | H-11->LUMO (31%), H-2->L+2 (35%)                                  |
| 29 | 43070.813063  | 232.175788866 | 0.0456 | H-11->LUMO (23%), H-2->L+2 (10%), H-2->L+4 (23%), HOMO->L+9 (15%) |
| 30 | 43242.6091564 | 231.253390928 | 0.0317 | H-3->L+1 (11%), H-2->L+2 (18%), H-2->L+4 (20%), H-1->L+8 (23%)    |
| 31 | 43508.772118  | 229.838708683 | 0.0288 | HOMO->L+9 (70%)                                                   |
| 32 | 43595.0734419 | 229.383717253 | 0.083  | H-11->LUMO (16%), H-2->L+4 (12%), H-1->L+8 (39%)                  |
| 34 | 44598.4271516 | 224.223154014 | 0.0538 | H-3->L+1 (41%)                                                    |
| 36 | 44962.9897535 | 222.405139312 | 0.0407 | H-4->L+1 (23%), H-3->L+4 (11%)                                    |
| 37 | 45128.3334114 | 221.59027919  | 0.0103 | H-6->L+1 (10%), H-3->L+1 (10%), H-3->L+2 (12%), H-2->L+5 (17%)    |
| 39 | 45873.5897038 | 217.990352719 | 0.0575 | H-4->L+1 (16%), H-3->L+2 (10%), H-1->L+9 (11%), HOMO->L+10 (17%)  |
| 41 | 46402.6894092 | 215.504750421 | 0.0263 | H-2->L+6 (40%), HOMO->L+10 (14%)                                  |
| 45 | 47002.7659044 | 212.753437113 | 0.0537 | H-12->LUMO (15%), H-6->L+1 (11%), H-3->L+2 (21%)                  |
| 46 | 47114.0704156 | 212.250818318 | 0.027  | H-12->LUMO (14%), H-3->L+2 (19%), H-1->L+9 (10%)                  |
| 47 | 47148.7522561 | 212.094690135 | 0.1017 | H-3->L+4 (25%)                                                    |
| 48 | 47216.5028281 | 211.790357206 | 0.1151 | H-3->L+3 (20%)                                                    |
| 50 | 47581.06543   | 210.167635164 | 0.0159 | H-8->L+1 (20%), H-7->L+1 (14%), H-6->L+1 (10%), H-3->L+5 (11%)    |

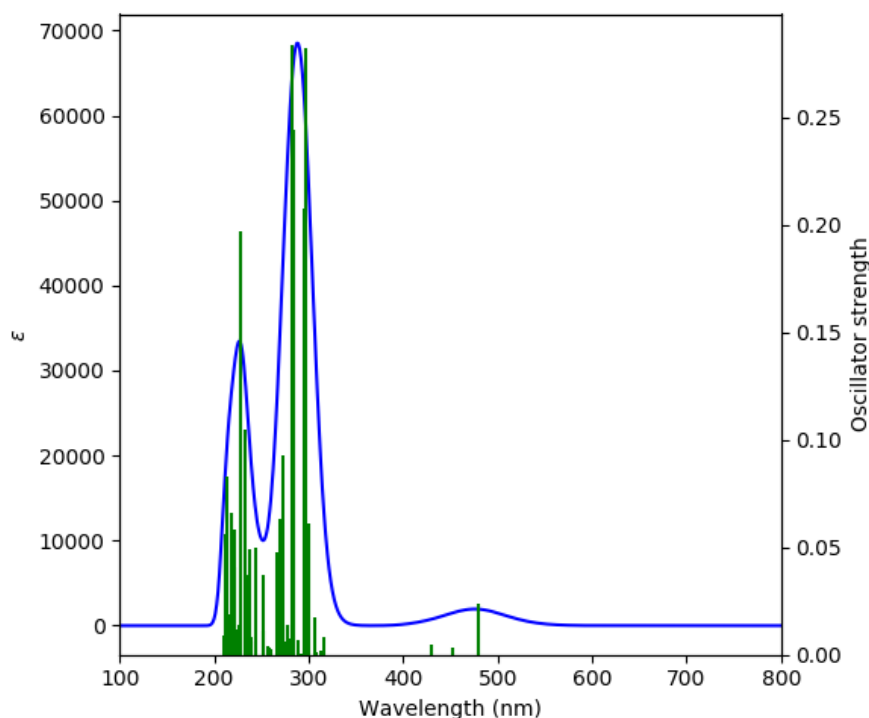

**Figure S101.** TD-DFT predicted absorption spectra for **1d** (solvent dichloromethane).

**Table S6.** UV-Vis transitions (oscillator strength > 0.01) calculated with TD-DFT for **1d**.

| No. | Energy (cm <sup>-1</sup> ) | Wavelength (nm) | Osc. Strength | Major contribs                                                                   |
|-----|----------------------------|-----------------|---------------|----------------------------------------------------------------------------------|
| 1   | 20833.3009011              | 480.000747241   | 0.0241        | HOMO->LUMO (97%)                                                                 |
| 7   | 32542.0515469              | 307.294700999   | 0.0177        | HOMO->L+1 (79%)                                                                  |
| 8   | 33270.3701962              | 300.567740636   | 0.0614        | H-1->L+1 (75%)                                                                   |
| 9   | 33694.6178259              | 296.78330384    | 0.2824        | H-1->L+2 (58%), HOMO->L+3 (29%)                                                  |
| 10  | 33793.0174662              | 295.919120274   | 0.2076        | H-4->LUMO (11%), H-1->L+3 (13%), H-1->L+5 (11%), HOMO->L+4 (55%)                 |
| 13  | 35207.7139347              | 284.028665381   | 0.2445        | HOMO->L+5 (63%)                                                                  |
| 14  | 35409.352542               | 282.411263752   | 0.284         | H-4->LUMO (12%), H-1->L+5 (51%), HOMO->L+5 (10%)                                 |
| 17  | 36074.7599459              | 277.202121788   | 0.0142        | H-5->LUMO (96%)                                                                  |
| 19  | 36463.5191807              | 274.246705329   | 0.0061        | H-6->LUMO (10%), H-2->L+2 (10%), H-1->L+3 (24%), H-1->L+6 (10%), HOMO->L+7 (30%) |
| 20  | 36629.669393               | 273.002737008   | 0.0929        | H-6->LUMO (62%), HOMO->L+7 (10%)                                                 |
| 22  | 37166.8346427              | 269.057079951   | 0.0634        | H-1->L+4 (28%), HOMO->L+6 (34%)                                                  |
| 23  | 37264.4277287              | 268.35243715    | 0.0167        | H-8->LUMO (29%), H-6->LUMO (11%), H-2->L+2 (32%)                                 |
| 24  | 37573.338075               | 266.146169394   | 0.0477        | H-8->LUMO (47%), H-2->L+2 (33%)                                                  |
| 28  | 39618.7601069              | 252.405677841   | 0.0373        | H-10->LUMO (76%)                                                                 |

|    |               |               |        |                                                                                  |
|----|---------------|---------------|--------|----------------------------------------------------------------------------------|
| 29 | 39801.8479623 | 251.244615815 | 0.0111 | H-11->LUMO (43%), H-2->L+3 (16%), H-2->L+5 (17%)                                 |
| 30 | 40854.4014921 | 244.77166804  | 0.0498 | HOMO->L+8 (74%)                                                                  |
| 33 | 42140.8558064 | 237.299404785 | 0.0493 | H-12->LUMO (38%), H-2->L+3 (10%), H-2->L+5 (11%), H-1->L+8 (30%)                 |
| 34 | 42461.0579147 | 235.509911696 | 0.0371 | H-12->LUMO (15%), H-3->L+2 (17%), H-1->L+8 (50%)                                 |
| 35 | 43099.042468  | 232.023716244 | 0.1045 | H-3->L+1 (79%)                                                                   |
| 36 | 43936.2459653 | 227.602513148 | 0.1971 | H-3->L+2 (60%), H-1->L+8 (12%)                                                   |
| 37 | 44171.7598586 | 226.388987715 | 0.0139 | H-2->L+6 (17%), H-2->L+7 (65%)                                                   |
| 39 | 44533.0962428 | 224.552093694 | 0.0119 | HOMO->L+9 (63%)                                                                  |
| 41 | 45023.4813356 | 222.106325485 | 0.0409 | H-3->L+3 (12%), H-3->L+5 (16%), H-1->L+9 (27%)                                   |
| 42 | 45050.9041862 | 221.971127564 | 0.0583 | H-4->L+3 (10%), H-3->L+5 (12%), H-1->L+9 (10%), HOMO->L+9 (14%)                  |
| 44 | 45810.6784583 | 218.289716209 | 0.0143 | H-3->L+3 (55%), H-3->L+5 (13%)                                                   |
| 45 | 45942.9533847 | 217.661235582 | 0.0659 | H-4->L+1 (38%), H-3->L+4 (37%)                                                   |
| 46 | 46389.7845384 | 215.564700279 | 0.0191 | H-13->LUMO (30%), H-4->L+1 (14%), H-3->L+4 (37%)                                 |
| 48 | 46901.1400464 | 213.214433383 | 0.0832 | H-5->L+1 (14%), H-4->L+2 (23%), H-3->L+5 (12%), H-2->L+8 (14%), HOMO->L+10 (10%) |
| 49 | 47133.4277219 | 212.163648674 | 0.0559 | H-2->L+8 (68%)                                                                   |



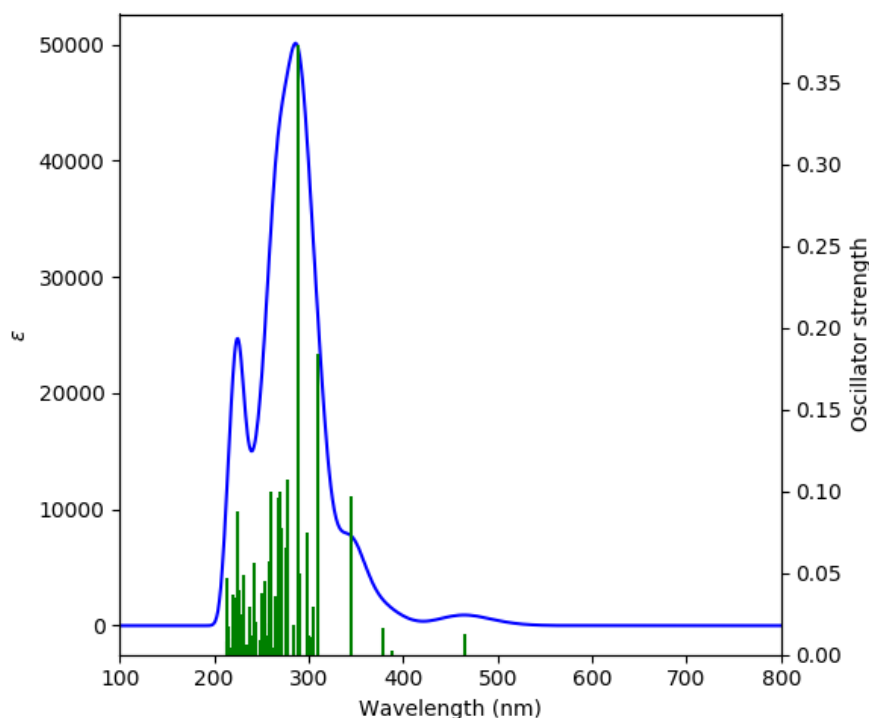

**Figure S102.** TD-DFT predicted absorption spectra for **1e** (solvent dichloromethane).

**Table S7.** UV-Vis transitions (oscillator strength > 0.01) calculated with TD-DFT for **1e**.

| No. | Energy (cm <sup>-1</sup> ) | Wavelength (nm) | Osc. Strength | Major contribs                                                    |
|-----|----------------------------|-----------------|---------------|-------------------------------------------------------------------|
| 1   | 21518.0656113              | 464.725788119   | 0.0126        | HOMO->LUMO (99%)                                                  |
| 3   | 26446.1131725              | 378.12739947    | 0.0164        | H-2->LUMO (49%), H-1->LUMO (42%)                                  |
| 4   | 29001.2776036              | 344.812395395   | 0.0973        | HOMO->L+1 (94%)                                                   |
| 5   | 32287.1803473              | 309.720449182   | 0.1843        | HOMO->L+2 (80%)                                                   |
| 6   | 32714.6541947              | 305.673412914   | 0.0298        | H-6->LUMO (39%)                                                   |
| 7   | 33039.6956296              | 302.666226473   | 0.0108        | HOMO->L+3 (74%)                                                   |
| 8   | 33397.805796               | 299.420867978   | 0.0115        | H-3->LUMO (18%), H-1->L+1 (18%), HOMO->L+3 (14%), HOMO->L+4 (34%) |
| 9   | 33575.2477704              | 297.838457318   | 0.0744        | H-3->LUMO (36%), HOMO->L+4 (45%)                                  |
| 10  | 34331.7958248              | 291.27517975    | 0.0493        | H-3->LUMO (27%), H-1->L+1 (46%), HOMO->L+5 (16%)                  |
| 11  | 34575.3752624              | 289.223180489   | 0.3731        | H-1->L+1 (12%), HOMO->L+5 (61%)                                   |
| 12  | 35298.0480308              | 283.3017846     | 0.0179        | HOMO->L+6 (70%)                                                   |
| 13  | 35982.0061865              | 277.916688362   | 0.107         | H-4->LUMO (61%)                                                   |
| 14  | 36118.313885               | 276.867852465   | 0.0658        | H-1->L+2 (11%), H-1->L+3 (13%), HOMO->L+7 (53%)                   |

|    |               |               |        |                                                                   |
|----|---------------|---------------|--------|-------------------------------------------------------------------|
| 15 | 36778.075408  | 271.901122858 | 0.0778 | H-1->L+2 (32%), H-1->L+3 (12%), HOMO->L+7 (25%)                   |
| 16 | 37104.7299517 | 269.507418947 | 0.0993 | H-1->L+2 (25%), H-1->L+3 (55%)                                    |
| 17 | 37351.535607  | 267.72660983  | 0.0958 | H-2->L+1 (53%), H-1->L+2 (12%)                                    |
| 18 | 37750.7800493 | 264.895188574 | 0.0355 | H-5->LUMO (83%)                                                   |
| 20 | 38336.3385648 | 260.84911534  | 0.0993 | H-8->LUMO (13%), H-7->LUMO (14%), H-1->L+4 (42%)                  |
| 21 | 38587.9835466 | 259.148032131 | 0.0572 | H-8->LUMO (54%), H-7->LUMO (10%), H-6->LUMO (13%), H-1->L+4 (11%) |
| 22 | 39138.0536672 | 255.505807341 | 0.0115 | H-9->LUMO (60%)                                                   |
| 23 | 39472.7737553 | 253.339176568 | 0.0451 | H-1->L+5 (24%), HOMO->L+8 (39%)                                   |
| 24 | 39506.6490413 | 253.121948904 | 0.0196 | H-9->LUMO (15%), H-1->L+5 (36%), HOMO->L+8 (26%)                  |
| 25 | 39881.6968508 | 250.741587988 | 0.0373 | H-11->LUMO (22%), H-1->L+6 (23%), HOMO->L+8 (10%)                 |
| 27 | 40847.1425023 | 244.815166678 | 0.0203 | H-3->L+1 (16%), H-2->L+2 (41%)                                    |
| 28 | 41118.9513448 | 243.196863561 | 0.056  | H-3->L+1 (33%), H-2->L+1 (10%), H-2->L+2 (17%)                    |
| 30 | 41885.9846068 | 238.743343242 | 0.012  | H-1->L+7 (68%)                                                    |
| 31 | 42169.8917658 | 237.136012953 | 0.0298 | H-12->LUMO (22%), H-10->LUMO (21%), H-2->L+3 (23%)                |
| 33 | 43253.094364  | 231.197331591 | 0.0491 | H-12->LUMO (26%), H-11->LUMO (19%), H-1->L+8 (11%)                |
| 34 | 43649.1125886 | 229.09973209  | 0.0247 | H-3->L+2 (43%), H-3->L+3 (10%), H-2->L+2 (12%)                    |
| 35 | 43908.0165603 | 227.748843682 | 0.0134 | H-4->L+1 (23%), H-2->L+5 (40%)                                    |
| 36 | 44199.9892636 | 226.244398847 | 0.0397 | H-4->L+1 (20%), H-2->L+5 (21%), H-1->L+8 (17%)                    |
| 37 | 44270.159499  | 225.885791088 | 0.0158 | H-6->L+1 (31%)                                                    |
| 38 | 44533.0962428 | 224.552093694 | 0.0875 | H-4->L+1 (21%), H-1->L+8 (28%), HOMO->L+9 (22%)                   |
| 40 | 44708.1185539 | 223.673022338 | 0.032  | H-7->L+1 (11%), H-4->L+2 (14%)                                    |
| 41 | 44810.5509664 | 223.161728306 | 0.0348 | H-8->L+1 (10%), H-6->L+1 (19%), HOMO->L+9 (17%)                   |
| 44 | 45578.3907828 | 219.402217328 | 0.0368 | H-3->L+2 (16%), H-3->L+3 (31%), H-2->L+6 (10%)                    |
| 47 | 46513.9939204 | 214.989063659 | 0.0174 | H-8->L+1 (22%), H-2->L+7 (11%)                                    |
| 48 | 46590.6165912 | 214.635493832 | 0.0102 | H-3->L+3 (12%), H-3->L+4 (19%), HOMO->L+10 (30%)                  |
| 49 | 46671.2720341 | 214.264569277 | 0.0471 | H-2->L+7 (33%)                                                    |

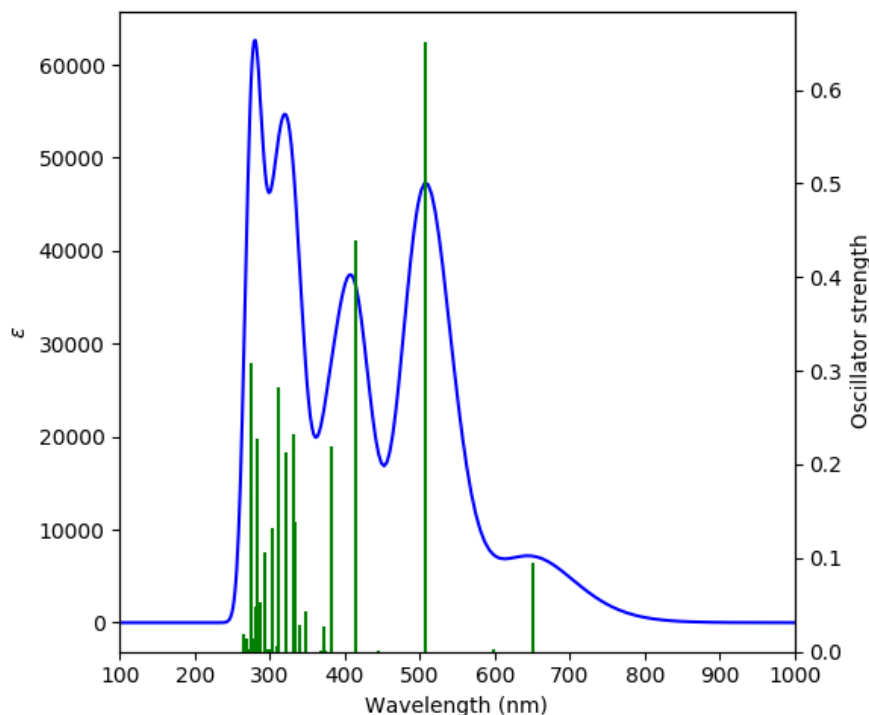

**Figure S103.** TD-DFT predicted absorption spectra for **3** (solvent dichloromethane).

**Table S8.** UV-Vis transitions (oscillator strength > 0.01) calculated with TD-DFT for **3**.

| No. | Energy (cm <sup>-1</sup> ) | Wavelength (nm) | Osc. Strength | Major contribs                                        |
|-----|----------------------------|-----------------|---------------|-------------------------------------------------------|
| 1   | 15347.117675               | 651.588149108   | 0.0946        | HOMO->LUMO (99%)                                      |
| 3   | 19668.6363056              | 508.423657066   | 0.6515        | H-2->LUMO (98%)                                       |
| 5   | 24115.9774271              | 414.662852884   | 0.4385        | H-4->LUMO (96%)                                       |
| 6   | 26206.5665071              | 381.583752961   | 0.219         | HOMO->L+1 (90%)                                       |
| 8   | 26826.0003085              | 372.77267893    | 0.0104        | H-11->LUMO (11%), H-9->LUMO (12%),<br>H-6->LUMO (68%) |
| 10  | 26849.390387               | 372.44793479    | 0.0273        | H-9->LUMO (66%), H-8->LUMO (27%)                      |
| 17  | 28686.7213762              | 348.593339366   | 0.0429        | H-13->LUMO (92%)                                      |
| 19  | 29324.7059296              | 341.009387239   | 0.0288        | H-15->LUMO (12%), H-2->L+1 (60%), H-1->L+2 (13%)      |
| 22  | 29892.5202476              | 334.531846668   | 0.1385        | H-1->L+2 (79%)                                        |
| 23  | 30106.2571713              | 332.156865037   | 0.2328        | H-1->L+3 (31%), HOMO->L+4 (56%)                       |
| 25  | 31131.3878505              | 321.219216053   | 0.2136        | H-1->L+3 (54%), HOMO->L+4 (32%)                       |
| 26  | 31144.2927214              | 321.086116466   | 0.0016        | H-16->LUMO (66%), H-2->L+2 (20%)                      |
| 27  | 32168.6168462              | 310.861982279   | 0.2827        | HOMO->L+5 (76%)                                       |

|    |               |               |        |                                                                  |
|----|---------------|---------------|--------|------------------------------------------------------------------|
| 29 | 32949.3615335 | 303.496017361 | 0.1317 | H-17->LUMO (73%), H-4->L+1 (10%)                                 |
| 32 | 33947.8759166 | 294.569239753 | 0.0117 | H-2->L+3 (21%), H-1->L+5 (54%)                                   |
| 33 | 34172.9046023 | 292.629500371 | 0.1059 | H-4->L+1 (58%)                                                   |
| 35 | 34782.6597506 | 287.499577999 | 0.0533 | H-4->L+1 (14%), H-3->L+2 (42%), H-2->L+4 (32%)                   |
| 36 | 35079.4717805 | 285.067006213 | 0.0234 | H-18->LUMO (60%), HOMO->L+6 (25%)                                |
| 37 | 35194.8090638 | 284.132810093 | 0.2282 | H-3->L+2 (13%), H-2->L+4 (44%), H-2->L+5 (26%)                   |
| 38 | 35548.8864582 | 281.302763499 | 0.0474 | H-3->L+2 (19%), H-2->L+4 (11%), H-2->L+5 (57%)                   |
| 39 | 35932.8063664 | 278.2972167   | 0.0133 | H-4->L+2 (74%)                                                   |
| 40 | 36240.1036038 | 275.937400989 | 0.3082 | H-3->L+3 (10%), H-1->L+6 (70%)                                   |
| 41 | 36394.1554998 | 274.769392576 | 0.1734 | H-3->L+3 (73%), H-1->L+6 (11%)                                   |
| 45 | 37262.8146198 | 268.364054139 | 0.0134 | H-1->L+8 (19%), HOMO->L+7 (50%), HOMO->L+11 (11%)                |
| 46 | 37432.1910499 | 267.149737152 | 0.0117 | H-4->L+3 (10%), H-3->L+5 (17%), H-2->L+6 (26%), HOMO->L+12 (12%) |
| 50 | 37641.088647  | 265.667130241 | 0.0194 | H-20->LUMO (19%), H-8->L+1 (24%), H-6->L+1 (32%), H-5->L+2 (19%) |

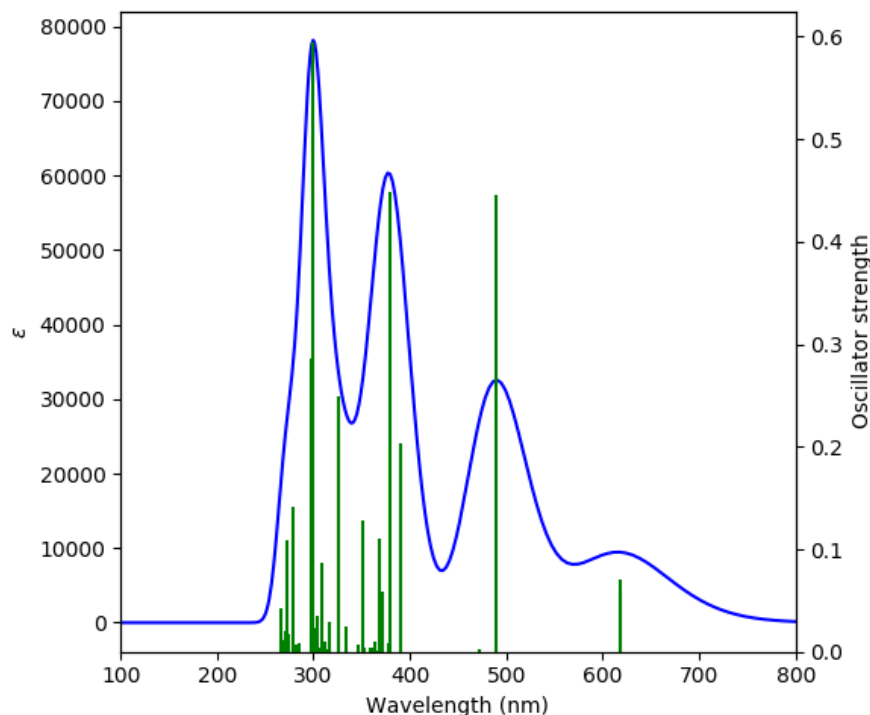

**Figure S104.** TD-DFT predicted absorption spectra for **4** (solvent dichloromethane).

**Table S9.** UV-Vis transitions (oscillator strength > 0.01) calculated with TD-DFT for **4**.

| No. | Energy (cm <sup>-1</sup> ) | Wavelength (nm) | Osc. Strength | Major contribs                                      |
|-----|----------------------------|-----------------|---------------|-----------------------------------------------------|
| 1   | 16164.1573116              | 618.652726971   | 0.0584        | H-1->LUMO (99%)                                     |
| 2   | 16187.54739                | 617.758809229   | 0.0703        | HOMO->LUMO (99%)                                    |
| 3   | 20412.2794891              | 489.901189396   | 0.4461        | H-2->LUMO (99%)                                     |
| 5   | 25658.1094953              | 389.740327588   | 0.2029        | H-4->LUMO (90%)                                     |
| 6   | 26336.4217701              | 379.702303042   | 0.4492        | H-1->L+1 (96%)                                      |
| 8   | 26867.1345844              | 372.201954346   | 0.0593        | H-5->LUMO (84%)                                     |
| 9   | 27143.7827536              | 368.408489369   | 0.1107        | H-8->LUMO (28%), H-1->L+3 (15%),<br>HOMO->L+2 (45%) |
| 19  | 28418.1387514              | 351.887929308   | 0.1282        | H-1->L+3 (77%), HOMO->L+2 (14%)                     |
| 21  | 29944.9462855              | 333.946165896   | 0.0245        | H-2->L+1 (70%)                                      |
| 24  | 30645.8420843              | 326.308540405   | 0.2491        | H-3->L+1 (62%), H-2->L+2 (24%)                      |
| 25  | 31637.904032               | 316.076564045   | 0.0288        | H-3->L+1 (27%), H-2->L+2 (62%)                      |
| 27  | 32075.8630869              | 311.760901738   | 0.01          | H-16->LUMO (32%), H-3->L+2 (48%)                    |
| 28  | 32373.4816712              | 308.894795486   | 0.086         | H-17->LUMO (13%), HOMO->L+4 (66%)                   |
| 30  | 32917.9059108              | 303.786031442   | 0.0344        | H-17->LUMO (61%), H-3->L+3 (28%)                    |

|    |               |               |        |                                                                                                                              |
|----|---------------|---------------|--------|------------------------------------------------------------------------------------------------------------------------------|
| 31 | 33151.0001408 | 301.650024359 | 0.0228 | H-3->L+3 (10%), H-1->L+5 (72%), HOMO->L+4 (11%)                                                                              |
| 33 | 33394.5795783 | 299.449794735 | 0.5953 | H-17->LUMO (15%), H-3->L+3 (48%), H-1->L+5 (20%), HOMO->L+4 (10%)                                                            |
| 34 | 33617.1886007 | 297.46687383  | 0.2856 | H-16->LUMO (17%), H-3->L+2 (29%), H-2->L+3 (30%), H-1->L+4 (10%)                                                             |
| 38 | 35781.9806882 | 279.470275476 | 0.1421 | H-4->L+1 (22%), HOMO->L+6 (60%)                                                                                              |
| 39 | 36429.6438946 | 274.501722524 | 0.0172 | H-2->L+4 (60%), H-1->L+6 (21%)                                                                                               |
| 41 | 36655.4791348 | 272.810511172 | 0.1091 | H-11->L+1 (10%), H-9->L+1 (36%), H-5->L+1 (25%)                                                                              |
| 45 | 36896.638909  | 271.027396958 | 0.0196 | H-4->L+2 (67%)                                                                                                               |
| 47 | 37303.1423413 | 268.073930837 | 0.0119 | H-1->L+8 (26%), H-1->L+11 (16%), HOMO->L+7 (24%), HOMO->L+10 (23%)                                                           |
| 49 | 37445.0959208 | 267.057668143 | 0.0421 | H-19->LUMO (13%), H-6->L+1 (10%), H-4->L+3 (15%), H-3->L+4 (29%) H-10->L+1 (9%), H-8->L+1 (3%), H-5->L+2 (8%), H-4->L+1 (5%) |
| 50 | 37528.9775814 | 266.460762975 | 0.0132 | H-9->L+1 (14%), H-7->L+1 (22%), H-6->L+2 (15%), H-5->L+1 (36%) H-11->L+1 (3%), H-7->L+3 (2%), H-5->L+3 (2%)                  |

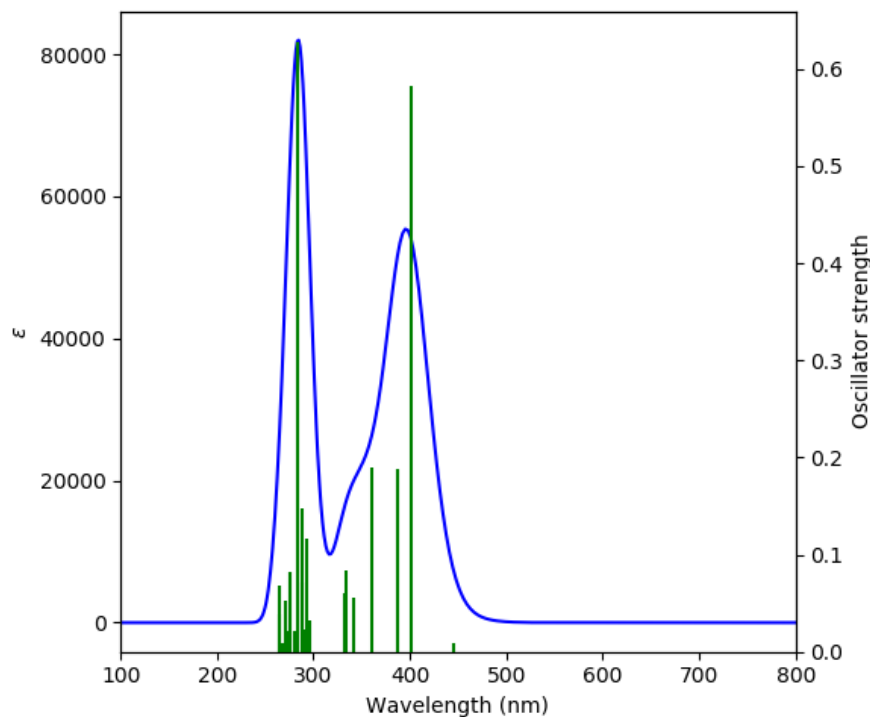

**Figure S105.** TD-DFT predicted absorption spectra for **5** (solvent dichloromethane).

**Table S10.** UV-Vis transitions (oscillator strength > 0.01) calculated with TD-DFT for **5**.

| No. | Energy (cm <sup>-1</sup> ) | Wavelength (nm) | Osc. Strength | Major contribs                                                                   |
|-----|----------------------------|-----------------|---------------|----------------------------------------------------------------------------------|
| 1   | 21412.4069811              | 467.01895816    | 0.0           | HOMO->LUMO (98%)                                                                 |
| 3   | 24941.8891624              | 400.931939633   | 0.583         | H-2->LUMO (81%), HOMO->L+2 (12%)                                                 |
| 5   | 25862.9743203              | 386.65313108    | 0.1889        | H-2->LUMO (18%), H-1->L+1 (19%), HOMO->L+2 (59%)                                 |
| 6   | 27716.4363982              | 360.796743721   | 0.1902        | H-1->L+1 (63%), HOMO->L+2 (24%), HOMO->L+3 (12%)                                 |
| 8   | 29248.0832588              | 341.902746635   | 0.0557        | H-2->L+1 (18%), H-1->L+1 (11%), HOMO->L+3 (63%)                                  |
| 10  | 29928.0086425              | 334.135161462   | 0.0844        | H-3->LUMO (68%), H-2->L+1 (12%), HOMO->L+3 (15%)                                 |
| 12  | 30140.9390117              | 331.774666878   | 0.0606        | H-3->LUMO (24%), H-2->L+1 (66%)                                                  |
| 17  | 33686.5522816              | 296.854362429   | 0.033         | H-6->LUMO (79%)                                                                  |
| 20  | 34055.1476557              | 293.641363741   | 0.1164        | H-6->LUMO (10%), H-4->L+2 (20%), H-3->L+1 (24%), H-1->L+4 (23%), HOMO->L+5 (16%) |
| 22  | 34320.5040628              | 291.371011967   | 0.0232        | H-10->LUMO (91%)                                                                 |
| 25  | 34686.6797736              | 288.295105363   | 0.0718        | H-12->LUMO (64%), H-1->L+4 (18%)                                                 |

|    |               |               |        |                                                                                     |
|----|---------------|---------------|--------|-------------------------------------------------------------------------------------|
| 26 | 34752.0106823 | 287.753134384 | 0.1469 | H-12->LUMO (30%), H-4->L+2 (10%), H-1->L+4 (45%)                                    |
| 28 | 35170.612431  | 284.32828742  | 0.6283 | HOMO->L+5 (75%)                                                                     |
| 29 | 35673.9023947 | 280.316963627 | 0.0208 | H-4->L+2 (41%), H-3->L+1 (38%)                                                      |
| 32 | 36262.6871278 | 275.765553853 | 0.0827 | H-15->LUMO (65%), H-2->L+4 (13%)                                                    |
| 34 | 36356.2474416 | 275.055890079 | 0.0827 | H-15->LUMO (20%), H-2->L+4 (11%), H-1->L+8 (10%), HOMO->L+7 (28%), HOMO->L+10 (12%) |
| 37 | 36604.6662057 | 273.189214287 | 0.0213 | H-5->L+2 (41%), H-1->L+6 (10%), HOMO->L+10 (16%)                                    |
| 41 | 36995.0385494 | 270.306516552 | 0.0527 | H-5->L+2 (13%), H-2->L+4 (26%), HOMO->L+7 (24%)                                     |
| 47 | 37684.6425862 | 265.360086065 | 0.0681 | H-11->L+2 (15%), H-10->L+1 (14%), H-9->L+2 (24%), H-6->L+1 (18%)                    |
| 48 | 37793.5274341 | 264.595571753 | 0.0383 | H-10->L+1 (15%), H-9->L+2 (11%), H-6->L+1 (15%), H-1->L+6 (13%)                     |



### 8.3. GIAO-DFT predicted NMR values.

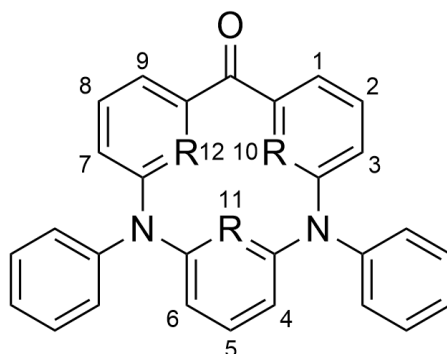

**Figure S106.** general macrocyclic structure with numbering for GIAO analysis, phenyl substituents decorating the cavity are omitted for clarity, R = CH, if not specified.

**Table S11.** summary of NMR spectra (SCF GIAO method) calculated at b3lyp/6-31g(d,p) degree of theory for **1a** and compared with experimental values using CDCl<sub>3</sub> as solvent.

|              | <b>1/9</b> | <b>2/8</b> | <b>3/7</b> | <b>4/6</b> | <b>5</b> | <b>10/12</b> | <b>11</b> |
|--------------|------------|------------|------------|------------|----------|--------------|-----------|
| theoretical  | 6.98       | 7.20       | 7.04       | 6.54       | 7.15     | 7.97         | 7.49      |
| experimental | 7.47       | 7.37       | 7.58       | 6.98       | 7.16     | 7.01         | 7.58      |

**Table S12.** summary of NMR spectra (SCF GIAO method) calculated at b3lyp/6-31g(d,p) degree of theory for **1b** (R(11) = N) and compared with experimental values using CDCl<sub>3</sub> as solvent.

|              | <b>1/9</b> | <b>2/8</b> | <b>3/7</b> | <b>4/6</b> | <b>5</b> | <b>10/12</b> |
|--------------|------------|------------|------------|------------|----------|--------------|
| theoretical  | 7.08       | 7.17       | 6.57       | 5.93       | 7.17     | 8.48         |
| experimental | 7.68       | 7.34       | 7.00       | 6.23       | 7.24     | 8.66         |

**Table S13.** summary of NMR spectra (SCF GIAO method) calculated at b3lyp/6-31g(d,p) degree of theory for **1c** (R(12) = N) and compared with experimental values using CDCl<sub>3</sub> as solvent.

|              | <b>1</b> | <b>2</b> | <b>3</b> | <b>4</b> | <b>5</b> | <b>6</b> | <b>7</b> | <b>8</b> | <b>9</b> | <b>10</b> | <b>11</b> |
|--------------|----------|----------|----------|----------|----------|----------|----------|----------|----------|-----------|-----------|
| theoretical  | 7.28     | 7.28     | 7.28     | 6.70     | 7.12     | 6.27     | 6.59     | 7.56     | 7.73     | 9.02      | 8.02      |
| experimental | 7.50     | 7.16     | 7.18     | 6.33     | 7.01     | 6.72     | 7.16     | 7.41     | 7.16     | 8.77      | 8.00      |

**Table S14.** summary of NMR spectra (SCF GIAO method) calculated at b3lyp/6-31g(d,p) degree of theory for **1d** (R(10/12) = N) and compared with experimental values using CDCl<sub>3</sub> as solvent.

|              | <b>1</b> | <b>2/8</b> | <b>3</b> | <b>4/6</b> | <b>5</b> | <b>7</b> | <b>9</b> | <b>11</b> |
|--------------|----------|------------|----------|------------|----------|----------|----------|-----------|
| theoretical  | 7.53     | 7.53       | 6.82     | 6.34       | 7.07     | 6.76     | 7.68     | 8.36      |
| experimental | 7.50     | 7.50       | 6.77     | 6.42       | 6.98     | 6.77     | 7.50     | 8.51      |

**Table S15.** summary of NMR spectra (SCF GIAO method) calculated at b3lyp/6-31g(d,p) degree of theory for **1e** (R(11/12) = N) and compared with experimental values using CDCl<sub>3</sub> as solvent.

|              | <b>1</b> | <b>2</b> | <b>3</b> | <b>4</b> | <b>5</b> | <b>6</b> | <b>7</b> | <b>8</b> | <b>9</b> | <b>10</b> |
|--------------|----------|----------|----------|----------|----------|----------|----------|----------|----------|-----------|
| theoretical  | 7.30     | 7.23     | 6.80     | 6.17     | 7.23     | 5.79     | 6.25     | 7.59     | 7.59     | 9.88      |
| experimental | 7.30     | 7.15     | 6.88     | 6.28     | 7.26     | 5.94     | 6.44     | 7.50     | 7.60     | 9.67      |

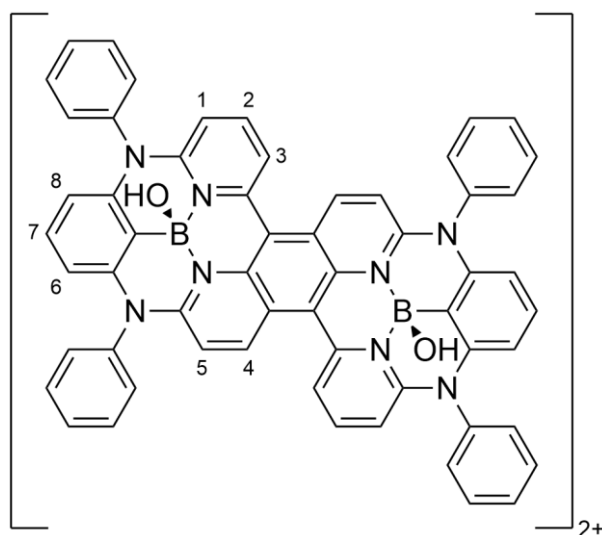

**Figure S107.** boron(III) complex structure **3** with numbering for GIAO analysis, phenyl substituents decorating the cavity are omitted for clarity (two-fold symmetry present).

**Table S16.** summary of NMR spectra (SCF GIAO method) calculated at b3lyp/6-31g(d,p) degree of theory for **3** and compared with experimental values using MeOD<sub>4</sub> as solvent.

|              | <b>1</b> | <b>2</b> | <b>3</b> | <b>4</b> | <b>5</b> | <b>6</b> | <b>7</b> | <b>8</b> |
|--------------|----------|----------|----------|----------|----------|----------|----------|----------|
| theoretical  | 6.91     | 7.94     | 7.41     | 8.69     | 7.03     | 6.41     | 7.41     | 6.56     |
| experimental | 7.03     | 8.14     | 7.81     | 9.01     | 7.24     | 6.45     | 7.34     | 6.52     |

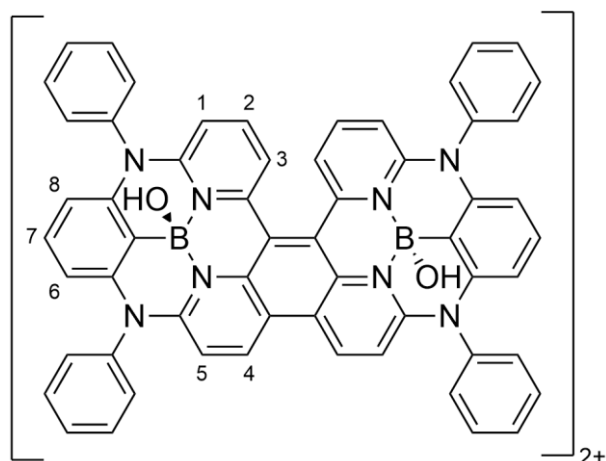

**Figure S108.** boron(III) complex structure **4** with numbering for GIAO analysis (two-fold symmetry present).

**Table S17.** summary of NMR spectra (SCF GIAO method) calculated at b3lyp/6-31g(d,p) degree of theory for **4** and compared with experimental values using MeOD<sub>4</sub> as solvent.

|              | <b>1</b> | <b>2</b> | <b>3</b> | <b>4</b> | <b>5</b> | <b>6</b> | <b>7</b> | <b>8</b> |
|--------------|----------|----------|----------|----------|----------|----------|----------|----------|
| theoretical  | 6.83     | 7.74     | 7.74     | 8.69     | 7.12     | 6.47     | 7.41     | 6.52     |
| experimental | 6.95     | 7.65     | 7.68     | 9.13     | 7.30     | 6.52     | 7.29     | 6.46     |

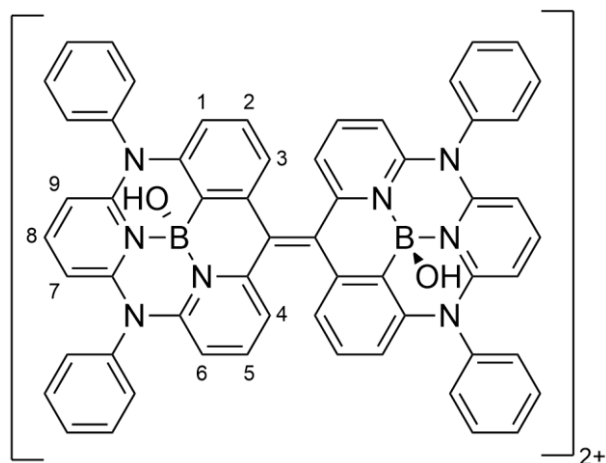

**Figure S109.** boron(III) complex structure **5** with numbering for GIAO analysis (two-fold symmetry present).

**Table S18.** summary of NMR spectra (SCF GIAO method) calculated at b3lyp/6-31g(d,p) degree of theory for **5** and compared with experimental values using MeOD<sub>4</sub> as solvent.

|              | <b>1</b> | <b>2</b> | <b>3</b> | <b>4</b> | <b>5</b> | <b>6</b> | <b>7</b> | <b>8</b> | <b>9</b> |
|--------------|----------|----------|----------|----------|----------|----------|----------|----------|----------|
| theoretical  | 6.41     | 7.19     | 7.02     | 7.26     | 7.71     | 6.75     | 6.07     | 7.53     | 6.17     |
| experimental | 6.44     | 7.09     | 6.93     | 7.41     | 7.82     | 6.79     | 6.14     | 7.71     | 6.35     |

## 9. Crystallographic data.

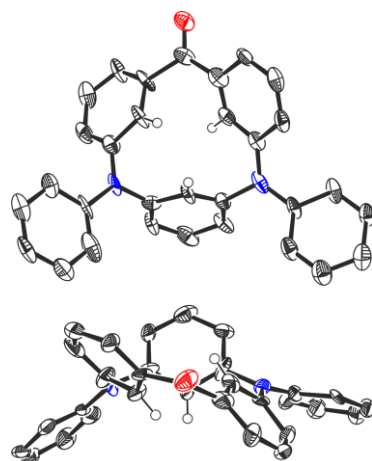

**Figure S110.** X-ray crystal structures of **1a**, thermal ellipsoids present 50% probability. External protons (outside the cavity) have been removed for clarity.

**Table S19.** Crystal data and structure refinement for **1a**.

|                                             |                                                               |
|---------------------------------------------|---------------------------------------------------------------|
| Identification code                         | <b>1a</b>                                                     |
| Deposition number                           | 2153360                                                       |
| Empirical formula                           | C <sub>31</sub> H <sub>22</sub> N <sub>2</sub> O              |
| Formula weight                              | 438.50                                                        |
| Temperature/K                               | 100(2)                                                        |
| Crystal system                              | orthorhombic                                                  |
| Space group                                 | Pna2 <sub>1</sub>                                             |
| a/Å                                         | 14.420(5)                                                     |
| b/Å                                         | 37.960(9)                                                     |
| c/Å                                         | 8.121(3)                                                      |
| Volume/Å <sup>3</sup>                       | 4445(2)                                                       |
| Z                                           | 8                                                             |
| $\rho_{\text{calc}}/\text{g}/\text{cm}^3$   | 1.310                                                         |
| $\mu/\text{mm}^{-1}$                        | 0.621                                                         |
| F(000)                                      | 1840.0                                                        |
| Crystal size/mm <sup>3</sup>                | 0.04 × 0.03 × 0.01                                            |
| Radiation                                   | CuK $\alpha$ ( $\lambda$ = 1.54184)                           |
| 2 $\theta$ range for data collection/°      | 9.298 to 136.326                                              |
| Index ranges                                | -13 ≤ h ≤ 17, -44 ≤ k ≤ 37, -9 ≤ l ≤ 9                        |
| Reflections collected                       | 14528                                                         |
| Independent reflections                     | 6598 [R <sub>int</sub> = 0.1911, R <sub>sigma</sub> = 0.2776] |
| Data/restraints/parameters                  | 6598/19/613                                                   |
| Goodness-of-fit on F <sup>2</sup>           | 0.982                                                         |
| Final R indexes [ $I \geq 2\sigma(I)$ ]     | R <sub>1</sub> = 0.1329, wR <sub>2</sub> = 0.2932             |
| Final R indexes [all data]                  | R <sub>1</sub> = 0.2719, wR <sub>2</sub> = 0.3942             |
| Largest diff. peak/hole / e Å <sup>-3</sup> | 0.51/-0.37                                                    |
| Flack parameter                             | -2.1(10)                                                      |

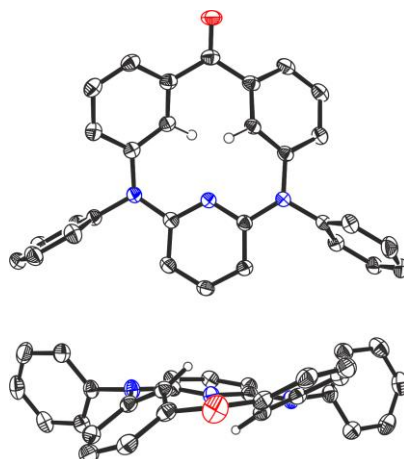

**Figure S111.** X-Ray crystal structures of **1b**, thermal ellipsoids present 50% probability. External protons (outside the cavity) have been removed for clarity.

**Table S20.** Crystal data and structure refinement for **1b**.

| Identification code                         | <b>1b</b>                                                     |
|---------------------------------------------|---------------------------------------------------------------|
| Deposition number                           | 2153365                                                       |
| Empirical formula                           | C <sub>30</sub> H <sub>21</sub> N <sub>3</sub> O              |
| Formula weight                              | 439.50                                                        |
| Temperature/K                               | 151(2)                                                        |
| Crystal system                              | monoclinic                                                    |
| Space group                                 | P2 <sub>1</sub> /c                                            |
| a/Å                                         | 14.826(4)                                                     |
| b/Å                                         | 5.850(3)                                                      |
| c/Å                                         | 25.150(7)                                                     |
| $\beta$ /°                                  | 94.3900(9)                                                    |
| Volume/Å <sup>3</sup>                       | 2174.9(14)                                                    |
| Z                                           | 4                                                             |
| $\rho_{\text{calc}}/\text{g}/\text{cm}^3$   | 1.342                                                         |
| $\mu/\text{mm}^{-1}$                        | 0.650                                                         |
| F(000)                                      | 920.0                                                         |
| Crystal size/mm <sup>3</sup>                | 0.40 × 0.10 × 0.04                                            |
| Radiation                                   | CuK $\alpha$ ( $\lambda$ = 1.54184)                           |
| 2 $\theta$ range for data collection/°      | 5.978 to 147.836                                              |
| Index ranges                                | -18 ≤ h ≤ 18, -7 ≤ k ≤ 7, -31 ≤ l ≤ 31                        |
| Reflections collected                       | 37790                                                         |
| Independent reflections                     | 4384 [R <sub>int</sub> = 0.0186, R <sub>sigma</sub> = 0.0089] |
| Data/restraints/parameters                  | 4384/0/308                                                    |
| Goodness-of-fit on F <sup>2</sup>           | 1.027                                                         |
| Final R indexes [ $ I  \geq 2\sigma(I)$ ]   | R1 = 0.0324, wR2 = 0.0818                                     |
| Final R indexes [all data]                  | R1 = 0.0337, wR2 = 0.0828                                     |
| Largest diff. peak/hole / e Å <sup>-3</sup> | 0.20/-0.17                                                    |

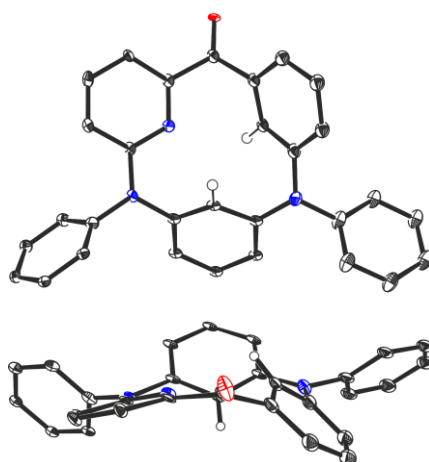

**Figure S112.** X-Ray crystal structures of **1c**, thermal ellipsoids present 50% probability. External protons (outside the cavity) and solvent atoms have been removed for clarity.

**Table S21.** Crystal data and structure refinement for **1c**.

| Identification code                         | <b>1c</b>                                                                              |
|---------------------------------------------|----------------------------------------------------------------------------------------|
| Deposition number                           | 2153363                                                                                |
| Empirical formula                           | C <sub>30.9</sub> H <sub>22.8</sub> Cl <sub>1.8</sub> N <sub>3</sub> O                 |
| Exact composition                           | C <sub>30</sub> H <sub>21</sub> N <sub>3</sub> O·0.9(CH <sub>2</sub> Cl <sub>2</sub> ) |
| Formula weight                              | 515.93                                                                                 |
| Temperature/K                               | 100(2)                                                                                 |
| Crystal system                              | monoclinic                                                                             |
| Space group                                 | P2 <sub>1</sub> /n                                                                     |
| a/Å                                         | 8.416(6)                                                                               |
| b/Å                                         | 31.033(9)                                                                              |
| c/Å                                         | 9.694(6)                                                                               |
| $\beta$ /°                                  | 98.93(3)                                                                               |
| Volume/Å <sup>3</sup>                       | 2501(2)                                                                                |
| Z                                           | 4                                                                                      |
| $\rho_{\text{calc}}/\text{cm}^3$            | 1.370                                                                                  |
| $\mu/\text{mm}^{-1}$                        | 0.269                                                                                  |
| F(000)                                      | 1071.0                                                                                 |
| Crystal size/mm <sup>3</sup>                | 0.200 × 0.150 × 0.090                                                                  |
| Radiation                                   | MoK $\alpha$ ( $\lambda$ = 0.71073)                                                    |
| 2 $\theta$ range for data collection/°      | 4.998 to 50.078                                                                        |
| Index ranges                                | -9 ≤ h ≤ 10, -36 ≤ k ≤ 34, -10 ≤ l ≤ 11                                                |
| Reflections collected                       | 10562                                                                                  |
| Independent reflections                     | 4382 [R <sub>int</sub> = 0.0747, R <sub>sigma</sub> = 0.1202]                          |
| Data/restraints/parameters                  | 4382/0/328                                                                             |
| Goodness-of-fit on F <sup>2</sup>           | 1.190                                                                                  |
| Final R indexes [I ≥ 2 $\sigma$ (I)]        | R1 = 0.1160, wR2 = 0.1931                                                              |
| Final R indexes [all data]                  | R1 = 0.1647, wR2 = 0.2102                                                              |
| Largest diff. peak/hole / e Å <sup>-3</sup> | 0.62/-0.37                                                                             |

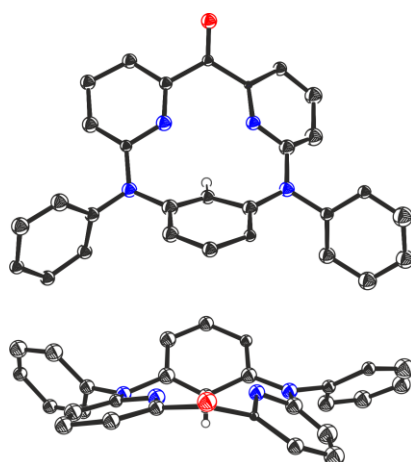

**Figure S113.** X-Ray crystal structures of **1d**, thermal ellipsoids present 50% probability. External protons (outside the cavity) and solvent atoms have been removed for clarity.

**Table S22.** Crystal data and structure refinement for **1d**.

| Identification code                         | <b>1d</b>                                                                        |
|---------------------------------------------|----------------------------------------------------------------------------------|
| Deposition number                           | 2153361                                                                          |
| Empirical formula                           | C <sub>30</sub> H <sub>22</sub> Cl <sub>2</sub> N <sub>4</sub> O                 |
| Exact composition                           | C <sub>29</sub> H <sub>20</sub> N <sub>4</sub> O·CH <sub>2</sub> Cl <sub>2</sub> |
| Formula weight                              | 525.41                                                                           |
| Temperature/K                               | 100(2)                                                                           |
| Crystal system                              | monoclinic                                                                       |
| Space group                                 | P2 <sub>1</sub> /n                                                               |
| a/Å                                         | 8.438(5)                                                                         |
| b/Å                                         | 29.605(3)                                                                        |
| c/Å                                         | 9.885(7)                                                                         |
| $\beta$ /°                                  | 96.74(5)                                                                         |
| Volume/Å <sup>3</sup>                       | 2452(2)                                                                          |
| Z                                           | 4                                                                                |
| $\rho_{\text{calc}}/\text{cm}^3$            | 1.423                                                                            |
| $\mu/\text{mm}^{-1}$                        | 2.640                                                                            |
| F(000)                                      | 1088.0                                                                           |
| Crystal size/mm <sup>3</sup>                | 0.52 × 0.30 × 0.13                                                               |
| Radiation                                   | Cu K $\alpha$ ( $\lambda$ = 1.54184)                                             |
| 2 $\theta$ range for data collection/°      | 5.97 to 134.994                                                                  |
| Index ranges                                | -7 ≤ h ≤ 10, -35 ≤ k ≤ 32, -11 ≤ l ≤ 11                                          |
| Reflections collected                       | 8913                                                                             |
| Independent reflections                     | 4372 [R <sub>int</sub> = 0.0804, R <sub>sigma</sub> = 0.0944]                    |
| Data/restraints/parameters                  | 4372/4/358                                                                       |
| Goodness-of-fit on F <sup>2</sup>           | 1.077                                                                            |
| Final R indexes [I ≥ 2 $\sigma$ (I)]        | R1 = 0.1087, wR2 = 0.2766                                                        |
| Final R indexes [all data]                  | R1 = 0.1346, wR2 = 0.2956                                                        |
| Largest diff. peak/hole / e Å <sup>-3</sup> | 0.73/-0.52                                                                       |

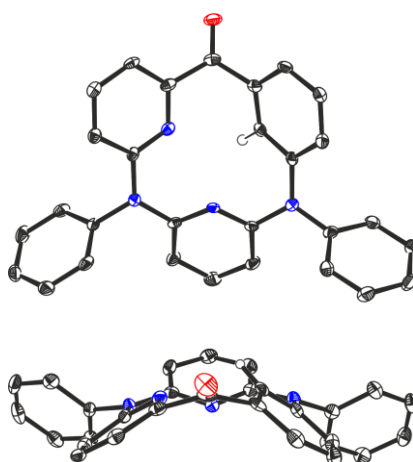

**Figure S114.** X-Ray crystal structures of **1e**, thermal ellipsoids present 50% probability. External protons (outside the cavity) have been removed for clarity.

**Table S23.** Crystal data and structure refinement for **1e**.

| Identification code                         | <b>1e</b>                                                |
|---------------------------------------------|----------------------------------------------------------|
| Deposition number                           | 2153364                                                  |
| Empirical formula                           | C <sub>29</sub> H <sub>20</sub> N <sub>4</sub> O         |
| Formula weight                              | 440.49                                                   |
| Temperature/K                               | 100(2)                                                   |
| Crystal system                              | triclinic                                                |
| Space group                                 | P-1                                                      |
| a/Å                                         | 8.829(4)                                                 |
| b/Å                                         | 9.614(4)                                                 |
| c/Å                                         | 25.805(9)                                                |
| $\alpha$ /°                                 | 91.74(2)                                                 |
| $\beta$ /°                                  | 94.62(3)                                                 |
| $\gamma$ /°                                 | 92.97(3)                                                 |
| Volume/Å <sup>3</sup>                       | 2179.0(15)                                               |
| Z                                           | 4                                                        |
| $\rho_{\text{calc}}$ /g/cm <sup>3</sup>     | 1.343                                                    |
| $\mu$ /mm <sup>-1</sup>                     | 0.084                                                    |
| F(000)                                      | 920.0                                                    |
| Crystal size/mm <sup>3</sup>                | 0.350 × 0.220 × 0.100                                    |
| Radiation                                   | MoK $\alpha$ ( $\lambda$ = 0.71073)                      |
| 2 $\theta$ range for data collection/°      | 4.48 to 50.122                                           |
| Index ranges                                | -10 ≤ h ≤ 10, -11 ≤ k ≤ 11, 0 ≤ l ≤ 30                   |
| Reflections collected                       | 7657                                                     |
| Independent reflections                     | 7657 [R <sub>int</sub> = ?, R <sub>sigma</sub> = 0.0298] |
| Data/restraints/parameters                  | 7657/0/614                                               |
| Goodness-of-fit on F <sup>2</sup>           | 1.248                                                    |
| Final R indexes [ $I \geq 2\sigma(I)$ ]     | R1 = 0.0767, wR2 = 0.1373                                |
| Final R indexes [all data]                  | R1 = 0.0824, wR2 = 0.1397                                |
| Largest diff. peak/hole / e Å <sup>-3</sup> | 0.29/-0.33                                               |



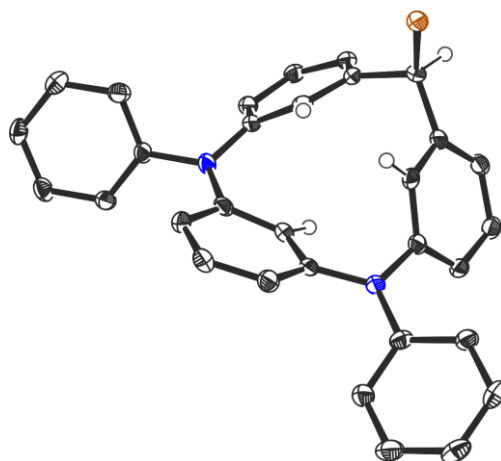

**Figure S115.** X-Ray crystal structures of **2a**, thermal ellipsoids present 50% probability. External protons (outside the cavity) and solvent atoms have been removed for clarity.

**Table S24.** Crystal data and structure refinement for **2a**.

| Identification code                         | <b>2a</b>                                                     |
|---------------------------------------------|---------------------------------------------------------------|
| Deposition number                           | 2153366                                                       |
| Empirical formula                           | C <sub>31</sub> H <sub>23</sub> BrN <sub>2</sub>              |
| Formula weight                              | 503.42                                                        |
| Temperature/K                               | 100(2)                                                        |
| Crystal system                              | orthorhombic                                                  |
| Space group                                 | Pccn                                                          |
| a/Å                                         | 33.181(7)                                                     |
| b/Å                                         | 22.852(5)                                                     |
| c/Å                                         | 5.966(3)                                                      |
| Volume/Å <sup>3</sup>                       | 4524(3)                                                       |
| Z                                           | 8                                                             |
| $\rho_{\text{calc}}/\text{cm}^3$            | 1.478                                                         |
| $\mu/\text{mm}^{-1}$                        | 2.643                                                         |
| F(000)                                      | 2064.0                                                        |
| Crystal size/mm <sup>3</sup>                | 0.490 × 0.020 × 0.020                                         |
| Radiation                                   | CuK $\alpha$ ( $\lambda$ = 1.54184)                           |
| 2 $\theta$ range for data collection/°      | 4.696 to 150.882                                              |
| Index ranges                                | -38 ≤ h ≤ 41, -28 ≤ k ≤ 27, -7 ≤ l ≤ 5                        |
| Reflections collected                       | 22372                                                         |
| Independent reflections                     | 4486 [R <sub>int</sub> = 0.0470, R <sub>sigma</sub> = 0.0359] |
| Data/restraints/parameters                  | 4486/0/307                                                    |
| Goodness-of-fit on F <sup>2</sup>           | 1.074                                                         |
| Final R indexes [I >= 2 $\sigma$ (I)]       | R1 = 0.0466, wR2 = 0.1168                                     |
| Final R indexes [all data]                  | R1 = 0.0577, wR2 = 0.1232                                     |
| Largest diff. peak/hole / e Å <sup>-3</sup> | 1.18/-0.60                                                    |

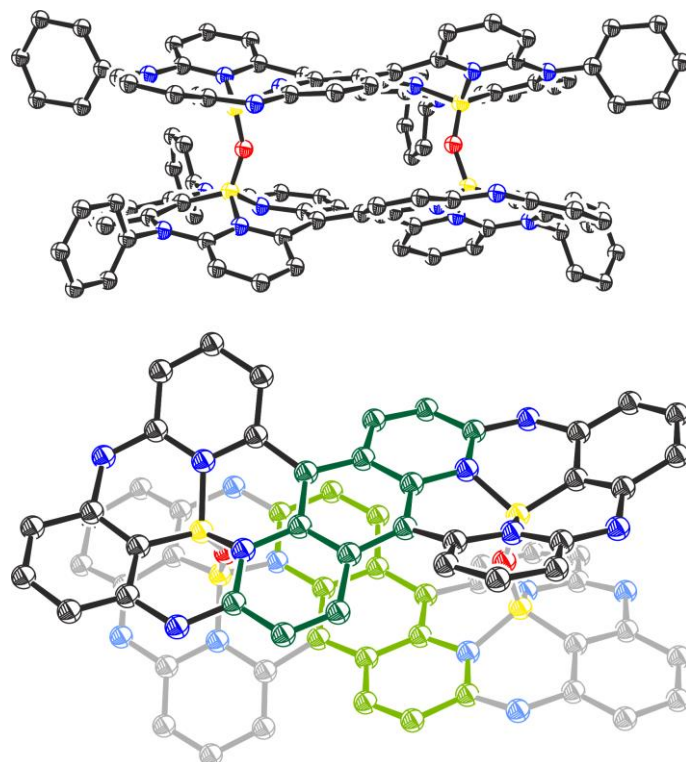

**Figure S116.** X-Ray crystal structures of **3-O-3**, thermal ellipsoids present 50% probability. External phenyl substituents, protons, solvent and counter anion atoms have been removed for clarity. Color scheme applied in the bottom part is intended to highlight the pyrido[2,3-g]quinoline frames.

**Table S25.** Crystal data and structure refinement for **3-O-3**.

|                              |                                                                                               |
|------------------------------|-----------------------------------------------------------------------------------------------|
| Identification code          | <b>3-O-3</b>                                                                                  |
| Deposition number            | 2153367                                                                                       |
| Empirical formula            | $C_{141.09}H_{103.24}B_4Br_4Cl_2N_{16}O_{11.03}Zn^I$                                          |
| Exact composition            | $[C_{116}H_{72}B_4N_{16}O_2]ZnBr_4[ClO_4]_2 \cdot 0.45H_2O \cdot 0.583CH_3OH \cdot 3.5C_7H_8$ |
| Formula weight               | 2693.59                                                                                       |
| Temperature/K                | 100(2)                                                                                        |
| Crystal system               | triclinic                                                                                     |
| Space group                  | P-1                                                                                           |
| a/Å                          | 16.853(4)                                                                                     |
| b/Å                          | 17.842(3)                                                                                     |
| c/Å                          | 22.270(5)                                                                                     |
| $\alpha/^\circ$              | 73.04(2)                                                                                      |
| $\beta/^\circ$               | 79.04(2)                                                                                      |
| $\gamma/^\circ$              | 82.640(10)                                                                                    |
| Volume/Å <sup>3</sup>        | 6269(2)                                                                                       |
| Z                            | 2                                                                                             |
| $\rho_{calc}/cm^3$           | 1.429                                                                                         |
| $\mu/mm^{-1}$                | 2.712                                                                                         |
| F(000)                       | 2748.0                                                                                        |
| Crystal size/mm <sup>3</sup> | 0.232 × 0.066 × 0.011                                                                         |

|                                                |                                                                    |
|------------------------------------------------|--------------------------------------------------------------------|
| Radiation                                      | CuK $\alpha$ ( $\lambda = 1.54184$ )                               |
| 2 $\theta$ range for data collection/ $^\circ$ | 7.058 to 148.054                                                   |
| Index ranges                                   | $-20 \leq h \leq 20$ , $-21 \leq k \leq 12$ , $-27 \leq l \leq 27$ |
| Reflections collected                          | 84401                                                              |
| Independent reflections                        | 24149 [ $R_{\text{int}} = 0.0766$ , $R_{\text{sigma}} = 0.0861$ ]  |
| Data/restraints/parameters                     | 24149/194/1649                                                     |
| Goodness-of-fit on $F^2$                       | 1.336                                                              |
| Final R indexes [ $ I  > 2\sigma(I)$ ]         | $R1 = 0.1345$ , $wR2 = 0.3566$                                     |
| Final R indexes [all data]                     | $R1 = 0.1788$ , $wR2 = 0.3852$                                     |
| Largest diff. peak/hole / $e \text{ \AA}^{-3}$ | 1.27/-2.11                                                         |

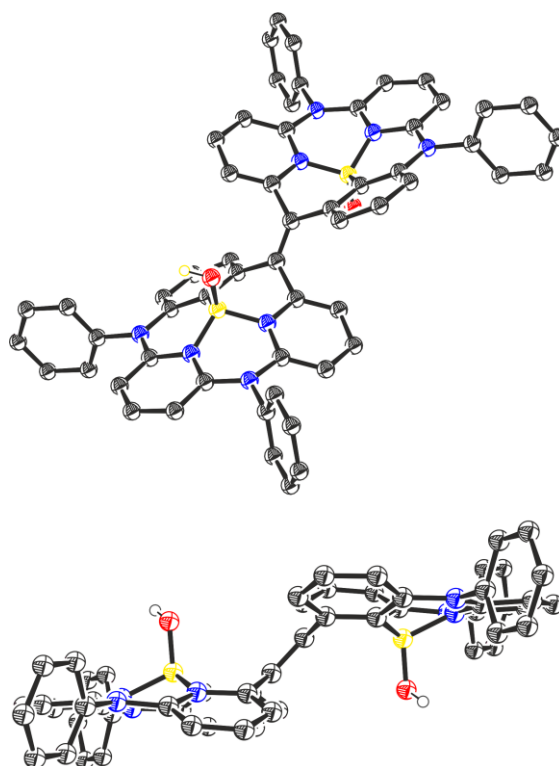

**Figure S117.** X-Ray crystal structures of **5**, thermal ellipsoids present 50% probability. External protons (outside the cavity) and solvent atoms have been removed for clarity.

**Table S26.** Crystal data and structure refinement for **5**.

|                     |                                                                                         |
|---------------------|-----------------------------------------------------------------------------------------|
| Identification code | <b>5</b>                                                                                |
| Deposition number   | 2153362                                                                                 |
| Empirical formula   | $C_{72.1}H_{76.8}B_2Br_2N_8O_{8.6}$                                                     |
| Exact composition   | $[C_{58}H_{40}B_2N_8O_2]Br_2 \cdot 2.3(C_4H_8O) \cdot 4.1(CH_4O) \cdot 0.2(C_4H_{10}O)$ |
| Formula weight      | 1374.45                                                                                 |
| Temperature/K       | 100(2)                                                                                  |
| Crystal system      | monoclinic                                                                              |
| Space group         | C2/c                                                                                    |
| a/ $\text{\AA}$     | 27.431(8)                                                                               |
| b/ $\text{\AA}$     | 12.568(3)                                                                               |

|                                               |                                                               |
|-----------------------------------------------|---------------------------------------------------------------|
| $c/\text{\AA}$                                | 19.588(5)                                                     |
| $\beta/^\circ$                                | 90.23(3)                                                      |
| Volume/ $\text{\AA}^3$                        | 6753(3)                                                       |
| $Z$                                           | 4                                                             |
| $\rho_{\text{calc}}/\text{cm}^3$              | 1.352                                                         |
| $\mu/\text{mm}^{-1}$                          | 1.265                                                         |
| $F(000)$                                      | 2857.0                                                        |
| Crystal size/ $\text{mm}^3$                   | $0.490 \times 0.220 \times 0.100$                             |
| Radiation                                     | Mo $K_\alpha$ ( $\lambda = 0.71073$ )                         |
| $2\theta$ range for data collection/ $^\circ$ | 5.102 to 51.11                                                |
| Index ranges                                  | $-33 \leq h \leq 33, -15 \leq k \leq 15, -23 \leq l \leq 23$  |
| Reflections collected                         | 50611                                                         |
| Independent reflections                       | 6317 [ $R_{\text{int}} = 0.0299, R_{\text{sigma}} = 0.0194$ ] |
| Data/restraints/parameters                    | 6317/3/490                                                    |
| Goodness-of-fit on $F^2$                      | 1.042                                                         |
| Final R indexes [ $I \geq 2\sigma(I)$ ]       | $R_1 = 0.0747, wR_2 = 0.2060$                                 |
| Final R indexes [all data]                    | $R_1 = 0.0870, wR_2 = 0.2168$                                 |
| Largest diff. peak/hole / $e \text{\AA}^{-3}$ | 1.54/-1.56                                                    |
